# Supplementary material for: Ruthenium complexes of redox non-innocent aryl-azo-oximes for catalytic α-alkylation of ketones and synthesis of 2-substituted quinolines
Source: Royal Society of Chemistry journal article supplement (doi:10.1039/d4nj00391h), 2024-01-01
Supplement: d4nj00391h1.pdf [file d4nj00391h1.pdf]

## Electronic Supplementary Information

### **Ruthenium complexes of redox non-innocent aryl-azo-oximes in catalytic $\alpha$ - alkylation of ketones and synthesis of 2-substituted quinolines**

Supriyo Halder<sup>a†</sup>, Srijita Naskar<sup>a†</sup>, Debashis Jana<sup>a</sup>, Gopal Kanrar<sup>b</sup>, Kausikisankar Pramanik<sup>a\*</sup>, Sanjib Ganguly<sup>b\*</sup>

<sup>a</sup>Department of Chemistry, Jadavpur University, Kolkata – 700032, India

<sup>b</sup>Department of Chemistry, St. Xavier's College (Autonomous), Kolkata – 700016, India

<sup>†</sup>Authors contributed equally to this work

kpramanik@hotmail.com Tel: +91 33 2457 2781

\*To whom correspondence should be addressed.

icsgxav@gmail.com icsg@sxccal.edu Tel: +91 33 2255 1266

## Index

|    |                                                        |         |
|----|--------------------------------------------------------|---------|
| 1  | Crystallographic Details                               | S3-S4   |
| 2  | Physical Measurements                                  | S4-S5   |
| 3  | X-ray Crystallography                                  | S5-S6   |
| 4  | Computational Studies                                  | S7-S8   |
| 5  | NMR Spectrum of Complexes                              | S9-S15  |
| 6  | Inter and Intramolecular interactions                  | S16-S18 |
| 7  | MO Contributions and Optimised geometry                | S18-S21 |
| 8  | Optical Transitions of Complexes and NTOs of Complexes | S21-S31 |
| 9  | MO Diagram of Complexes                                | S32-S34 |
| 10 | Coordinates of Optimized Geometry                      | S35-S48 |
| 11 | NMR spectra of alkylated ketones                       | S49-S62 |
| 12 | NMR spectra of 2-substituted quinolines                | S63-S93 |
| 13 | Mechanistic investigation                              | S93-S96 |
| 14 | Appendix: Supplementary data                           | S96-S97 |
| 15 | References                                             | S97-S98 |

**Table S1:** Crystallographic details of **1a**, **2a**, **3a** and **4a**

|                                                                                                                                                                                                                                                                                                                                                                                                                                                                                                                                                                                                                                  | <b>1a</b>                                                                         | <b>2a</b>                                                                          | <b>3a</b>                                                                                        | <b>4a</b>                                                                         |
|----------------------------------------------------------------------------------------------------------------------------------------------------------------------------------------------------------------------------------------------------------------------------------------------------------------------------------------------------------------------------------------------------------------------------------------------------------------------------------------------------------------------------------------------------------------------------------------------------------------------------------|-----------------------------------------------------------------------------------|------------------------------------------------------------------------------------|--------------------------------------------------------------------------------------------------|-----------------------------------------------------------------------------------|
| Empirical formula                                                                                                                                                                                                                                                                                                                                                                                                                                                                                                                                                                                                                | C <sub>50</sub> H <sub>40</sub> N <sub>3</sub> ClO <sub>2</sub> P <sub>2</sub> Ru | C <sub>50</sub> H <sub>39</sub> N <sub>3</sub> ClFO <sub>2</sub> P <sub>2</sub> Ru | C <sub>50</sub> H <sub>38</sub> N <sub>3</sub> ClF <sub>2</sub> O <sub>2</sub> P <sub>2</sub> Ru | C <sub>50</sub> H <sub>40</sub> N <sub>3</sub> ClO <sub>3</sub> P <sub>2</sub> Ru |
| <i>T</i> /K                                                                                                                                                                                                                                                                                                                                                                                                                                                                                                                                                                                                                      | 273.15                                                                            | 273.15                                                                             | 273.15                                                                                           | 273.15                                                                            |
| fw                                                                                                                                                                                                                                                                                                                                                                                                                                                                                                                                                                                                                               | 913.35                                                                            | 931.30                                                                             | 949.29                                                                                           | 929.31                                                                            |
| Crystal system                                                                                                                                                                                                                                                                                                                                                                                                                                                                                                                                                                                                                   | Monoclinic                                                                        | Monoclinic                                                                         | Monoclinic                                                                                       | Monoclinic                                                                        |
| Space Group                                                                                                                                                                                                                                                                                                                                                                                                                                                                                                                                                                                                                      | P 1 21 1                                                                          | P 1 21/n 1                                                                         | P 1 21/c 1                                                                                       | P 1 21/c 1                                                                        |
| <i>a</i> /Å                                                                                                                                                                                                                                                                                                                                                                                                                                                                                                                                                                                                                      | 11.0288(4)                                                                        | 10.5558(3)                                                                         | 12.2380(5)                                                                                       | 20.1633(17)                                                                       |
| <i>b</i> /Å                                                                                                                                                                                                                                                                                                                                                                                                                                                                                                                                                                                                                      | 16.7801(6)                                                                        | 21.1187(7)                                                                         | 18.6710(7)                                                                                       | 12.2066(10)                                                                       |
| <i>c</i> /Å                                                                                                                                                                                                                                                                                                                                                                                                                                                                                                                                                                                                                      | 12.7714(4)                                                                        | 19.2437(6)                                                                         | 20.9395(8)                                                                                       | 18.6526(16)                                                                       |
| <i>α</i> /deg                                                                                                                                                                                                                                                                                                                                                                                                                                                                                                                                                                                                                    | 90                                                                                | 90                                                                                 | 90                                                                                               | 90                                                                                |
| <i>β</i> /deg                                                                                                                                                                                                                                                                                                                                                                                                                                                                                                                                                                                                                    | 113.194(1)                                                                        | 94.6440(10)                                                                        | 99.9840(10)                                                                                      | 109.084(3)                                                                        |
| <i>γ</i> /deg                                                                                                                                                                                                                                                                                                                                                                                                                                                                                                                                                                                                                    | 90                                                                                | 90                                                                                 | 90                                                                                               | 90                                                                                |
| <i>V</i> /Å <sup>3</sup>                                                                                                                                                                                                                                                                                                                                                                                                                                                                                                                                                                                                         | 2172.50(13)                                                                       | 4275.8(2)                                                                          | 4712.1(3)                                                                                        | 4338.6(6)                                                                         |
| <i>Z</i>                                                                                                                                                                                                                                                                                                                                                                                                                                                                                                                                                                                                                         | 2                                                                                 | 4                                                                                  | 4                                                                                                | 4                                                                                 |
| D <sub>c</sub> /Mgm <sup>-3</sup>                                                                                                                                                                                                                                                                                                                                                                                                                                                                                                                                                                                                | 1.396                                                                             | 1.447                                                                              | 1.338                                                                                            | 1.423                                                                             |
| μ/mm <sup>-1</sup>                                                                                                                                                                                                                                                                                                                                                                                                                                                                                                                                                                                                               | 0.540                                                                             | 0.553                                                                              | 0.506                                                                                            | 0.543                                                                             |
| <i>F</i> (000)                                                                                                                                                                                                                                                                                                                                                                                                                                                                                                                                                                                                                   | 934.685                                                                           | 1904                                                                               | 1936                                                                                             | 1904                                                                              |
| cryst size/mm <sup>3</sup>                                                                                                                                                                                                                                                                                                                                                                                                                                                                                                                                                                                                       | 0.6×0.4×0.3                                                                       | 0.4×0.2×0.1                                                                        | 0.5×0.3×0.2                                                                                      | 0.35×0.26×0.18                                                                    |
| <i>θ</i> /deg                                                                                                                                                                                                                                                                                                                                                                                                                                                                                                                                                                                                                    | 2.35–30.05                                                                        | 2.163–25.715                                                                       | 1.690–28.422                                                                                     | 2.585–29.177                                                                      |
| Measured reflns                                                                                                                                                                                                                                                                                                                                                                                                                                                                                                                                                                                                                  | 41211                                                                             | 115966                                                                             | 160291                                                                                           | 98620                                                                             |
| Unique reflns                                                                                                                                                                                                                                                                                                                                                                                                                                                                                                                                                                                                                    | 12639                                                                             | 8138                                                                               | 11794                                                                                            | 11679                                                                             |
| <sup>a</sup> GOF on <i>F</i> <sup>2</sup>                                                                                                                                                                                                                                                                                                                                                                                                                                                                                                                                                                                        | 1.027                                                                             | 1.249                                                                              | 1.142                                                                                            | 1.086                                                                             |
| R1 <sup>b</sup> ,<br>wR2 <sup>c</sup> [ <i>I</i> >2σ( <i>I</i> )]                                                                                                                                                                                                                                                                                                                                                                                                                                                                                                                                                                | 0.0296, 0.0722                                                                    | 0.0552, 0.0948                                                                     | 0.0496, 0.1068                                                                                   | 0.0342, 0.0781                                                                    |
| R1, wR2                                                                                                                                                                                                                                                                                                                                                                                                                                                                                                                                                                                                                          | 0.0329, 0.0736                                                                    | 0.0655, 0.0989                                                                     | 0.0606, 0.1126                                                                                   | 0.0460, 0.0887                                                                    |
| <sup>a</sup> GOF = {Σ[w( <i>F</i> <sub>o</sub> <sup>2</sup> - <i>F</i> <sub>c</sub> <sup>2</sup> ) <sup>2</sup> ]/(n-p)} <sup>1/2</sup> . <sup>b</sup> R1 = Σ [  <i>F</i> <sub>o</sub>  -  <i>F</i> <sub>c</sub>  ]/ Σ   <i>F</i> <sub>o</sub>  .<br><sup>c</sup> wR2 = [Σ [w( <i>F</i> <sub>o</sub> <sup>2</sup> - <i>F</i> <sub>c</sub> <sup>2</sup> ) <sup>2</sup> ]/ Σ [w( <i>F</i> <sub>o</sub> <sup>2</sup> ) <sup>2</sup> ] <sup>1/2</sup> where w = 1/[σ <sup>2</sup> ( <i>F</i> <sub>o</sub> <sup>2</sup> )+(aP) <sup>2</sup> +bP], P = ( <i>F</i> <sub>o</sub> <sup>2</sup> +2 <i>F</i> <sub>c</sub> <sup>2</sup> )/3. |                                                                                   |                                                                                    |                                                                                                  |                                                                                   |

**Table S2:** Crystallographic and theoretical metrical parameters for complexes **1a**, **2a**, **3a**, **[3a]<sup>-</sup>** and **4a**

| Metrical Parameters | 1a          |        | 2a         |        | 3a        |        | [3a] <sup>-</sup> | 4a          |
|---------------------|-------------|--------|------------|--------|-----------|--------|-------------------|-------------|
|                     | Expt.       | Theo.  | Expt.      | Theo.  | Expt.     | Theo.  | Theo.             | Expt.       |
| Ru1-N1              | 2.0871(19)  | 2.132  | 2.083(3)   | 2.135  | 2.076(2)  | 2.140  | 2.144             | 2.0959(17)  |
| Ru1-N3              | 2.0408(18)  | 2.089  | 2.052(3)   | 2.080  | 2.042(2)  | 2.103  | 2.147             | 2.0300(16)  |
| Ru1-C1              | 1.881(2)    | 1.900  | 1.878(4)   | 1.903  | 1.881(3)  | 1.899  | 1.884             | 1.886(2)    |
| Ru1-C11             | 2.4386(5)   | 2.519  | 2.4213(11) | 2.528  | 2.4239(8) | 2.515  | 2.554             | 2.4239(5)   |
| Ru1-P1              | 2.4238(5)   | 2.502  | 2.4283(11) | 2.515  | 2.4257(7) | 2.507  | 2.475             | 2.4225(6)   |
| Ru1-P2              | 2.4120(5)   | 2.520  | 2.4075(11) | 2.512  | 2.4223(7) | 2.538  | 2.514             | 2.4103(16)  |
| N2-N3               | 1.317(3)    | 1.285  | 1.303(4)   | 1.282  | 1.301(3)  | 1.286  | 1.347             | 1.296(2)    |
| N1-O2               | 1.274(3)    | 1.254  | 1.265(4)   | 1.257  | 1.267(3)  | 1.253  | 1.296             | 1.302(2)    |
| C1-O1               | 1.148(3)    | 1.148  | 1.147(5)   | 1.147  | 1.139(4)  | 1.147  | 1.155             | 1.137(3)    |
| C2-N1               | 1.359(3)    | 1.359  | 1.349(5)   | 1.357  | 1.343(4)  | 1.354  | 1.362             | 1.337(3)    |
| C2-N2               | 1.330(4)    | 1.350  | 1.352(5)   | 1.352  | 1.349(4)  | 1.342  | 1.318             | 1.364(3)    |
| C9-N3               | 1.483(3)    | 1.436  | 1.445(5)   | 1.435  | 1.444(4)  | 1.435  | 1.395             | 1.448(2)    |
| C2-C3               | 1.487(4)    | 1.479  | 1.475(5)   | 1.477  | 1.477(4)  | 1.482  | 1.488             | 1.482(3)    |
| N1-Ru1-N3           | 76.34(8)    | 75.26  | 76.40(12)  | 75.33  | 76.20(9)  | 75.42  | 75.93             | 75.69(7)    |
| N1-Ru1-P1           | 89.55(5)    | 88.72  | 88.55(9)   | 88.49  | 89.24(7)  | 89.32  | 89.44             | 89.75(5)    |
| N1-Ru1-P2           | 85.85(5)    | 89.42  | 91.98(9)   | 88.59  | 90.63(6)  | 92.02  | 90.12             | 90.12(5)    |
| N3-Ru1-P1           | 91.14(5)    | 92.88  | 89.41(9)   | 91.85  | 93.88(6)  | 93.34  | 90.79             | 91.77(5)    |
| N3-Ru1-P2           | 91.22(5)    | 93.82  | 90.41(9)   | 91.55  | 92.42(6)  | 94.41  | 91.90             | 93.57(5)    |
| C1-Ru1-C11          | 87.56(6)    | 89.10  | 88.59(13)  | 87.28  | 86.97(11) | 90.34  | 88.73             | 87.58(6)    |
| C1-Ru1-P1           | 93.73(6)    | 93.36  | 93.50(13)  | 94.57  | 91.99(9)  | 91.83  | 90.75             | 91.32(6)    |
| C1-Ru1-P2           | 91.13(6)    | 89.21  | 85.96(13)  | 88.71  | 88.67(9)  | 87.58  | 89.78             | 89.34(6)    |
| C11-Ru1-P1          | 86.272(19)  | 86.89  | 89.89(4)   | 86.13  | 86.70(3)  | 87.58  | 89.97             | 86.787(18)  |
| C11-Ru1-P2          | 90.770(18)  | 85.93  | 90.39(4)   | 90.02  | 86.85(3)  | 84.65  | 87.16             | 87.741(17)  |
| N1-Ru1-C11          | 97.11(6)    | 96.64  | 93.36(9)   | 97.98  | 97.72(7)  | 95.33  | 93.50             | 93.36(9)    |
| N3-Ru1-C1           | 99.11(9)    | 98.97  | 101.66(15) | 99.46  | 99.09(12) | 98.87  | 101.82            | 97.93(5)    |
| P1-Ru1-P2           | 174.190(18) | 172.33 | 179.39(4)  | 174.81 | 173.48(3) | 172.21 | 177.07            | 174.454(17) |

**Physical measurements:**

NMR spectra (<sup>1</sup>H, <sup>13</sup>C, <sup>31</sup>P and <sup>19</sup>F) of all complexes were obtained from Bruker FT 300 and 400 MHz spectrometer. Elemental analysis (C, H, N) was done on a Perkin Elmer 2400 series II Analyzer. Cyclic voltametric experiment was performed on BASi Epsilon-EC using dichloromethane/acetonitrile (9:1 v/v) solution containing 0.2M tetrabutylammonium



hexafluorophosphate as supporting electrolyte. Glassy Carbon electrode as working electrode, Platinum wire as Auxiliary Electrode and Ag/AgCl reference electrode were used for electrochemical experiment. Electron-transfer ability of the synthesized complexes were monitored by cyclic voltammetry in dichloromethane : acetonitrile (1:9 v/v) (supporting electrolyte is 0.2 M Bu<sub>4</sub>NPF<sub>6</sub>) by means of a glassy carbon working electrode and the reported potential is referenced to Ag/AgCl electrode.

Infrared spectra were acquired from PerkinElmer L-0010 spectrometer. The absorption spectra were recorded using PerkinElmer LAMDA 25 spectrometer with solute concentration about 10<sup>-5</sup> M. Electron Paramagnetic Resonance (EPR) spectrum was taken for the sample in standard quartz EPR tubes using a JEOL JES-FA200 X-band spectrometer. Instrument settings: microwave frequency, 9.458 GHz; microwave power, 0.998 mW; modulation frequency, 100 kHz.

**Table S3:** Electrochemical data of Ru(II)-complexes with respect to Ag/AgCl

| Complex                                                                                                                                          | E <sub>1/2</sub> /V (ΔE <sup>a</sup> /mV)        |                                                                                |
|--------------------------------------------------------------------------------------------------------------------------------------------------|--------------------------------------------------|--------------------------------------------------------------------------------|
|                                                                                                                                                  | Oxidation                                        | Reduction                                                                      |
| <b>1a</b>                                                                                                                                        | +1.23(75 <sup>a</sup> )                          | -0.63 (E <sub>p</sub> <sup>2</sup> /V), -1.08 (E <sub>p</sub> <sup>2</sup> /V) |
| <b>2a</b>                                                                                                                                        | +1.24(87 <sup>a</sup> )                          | -0.61(E <sub>p</sub> <sup>2</sup> /V), -1.09(E <sub>p</sub> <sup>2</sup> /V)   |
| <b>3a</b>                                                                                                                                        | +1.35(70)                                        | -0.59 (110mV)V, -1.09(E <sub>p</sub> <sup>2</sup> /V)                          |
| <b>4a</b>                                                                                                                                        | +1.16(116), 0.68(E <sub>p</sub> <sup>1</sup> /V) | -0.65(E <sub>p</sub> <sup>2</sup> /V), -0.97(E <sub>p</sub> <sup>2</sup> /V)   |
| E <sub>p</sub> <sup>1</sup> = anodic peak potential; E <sub>p</sub> <sup>2</sup> = cathodic peak potential, <sup>a</sup> peak-to-peak separation |                                                  |                                                                                |

### X-Ray crystallography:

The suitable crystals of all complexes were placed on Bruker D8 QUEST SC-XRD Diffractometer equipped with graphite monochromator (Mo Kα, λ = 0.71073 Å) the crystals were kept at steady T= 273K during data collection. SAINT<sup>1</sup> crystallographic programme was utilized to integrate and scale the intensity data. SADABS<sup>2</sup> program was employed to process and rectify the integrated

data. Data collection, reduction, absorption corrections were performed. The structure solution was carried out with SHELXT 2014/5<sup>3</sup> solution programme using iterative method and Olex2 1.5-dev<sup>4</sup> as the graphical user interface. The SHELXL 2018/3<sup>3</sup> programme was utilised to refine the model structure using full matrix least square minimisation on F<sup>2</sup>. Lastly, the consistency regarding thermal parameters, bond distances and estimated standard deviation (ESD) within respective atoms were accomplished using suitable commands in SHELXL programme. All non-hydrogen atoms were refined anisotropically. Riding model was applied to determine the position of H atoms geometrically and refined. ORTEP plot was used to draw the molecular structure using Olex2 1.5-dev as GUI. Crystallographic and refinement data of both complexes are given in Table S1. Additional refinement data can be found in CIF files.

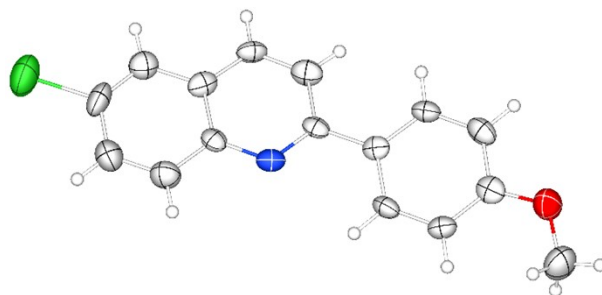

**Figure S1:** ORTEP view of **6-chloro-2-(4-methoxyphenyl)quinoline (10t)** (Thermal ellipsoids are set at 40% probability)

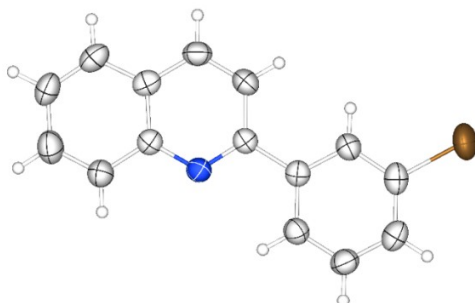

**Figure S2:** ORTEP view of **2-(3-bromophenyl)quinoline (10i)** (Thermal ellipsoids are set at 40% probability)

### **Computational Study:**

The singlet ground state ( $S_0$ ) and excited state molecular geometries of synthesised complex **1a**, **2a** and **3a** were computed by DFT method by employing (R)B3LYP<sup>5,6</sup> while for complex [**3a**]<sup>-</sup> (U)B3LYP which is incorporated in GAUSSIAN 09<sup>7</sup> programme package. The solution phase optimised geometries of the complexes were found without applying any geometry constraints. In order to verify all stationary points as the true minima in potential energy surface, frequency calculation was executed. The absence of any imaginary frequency (NImag = 0) indicates that all the obtained stationary points are indeed the true minima in potential energy surface. The X-Ray positional coordinates of complex **1a**, **2a** and **3a** were directly used as the initial input for geometry optimisation calculation. By using these ground state optimised geometries as well as excited state geometries, we performed subsequent Single Point Energy and TD-DFT<sup>8-11</sup> calculation. In TD-DFT calculation we employ conductor like continuum model (CPCM)<sup>12-14</sup> and dichloromethane (CH<sub>2</sub>Cl<sub>2</sub>) as solvent to simulate absorption spectra in dichloromethane solvent. The lowest 100 singlet-singlet transitions in absorption and emission processes for the complex **1a**, **2a** and **3a** were evaluated gradually. The experimental results and the results obtained from TD calculations were qualitatively comparable. Presently the approach of TD-DFT is documented as a rigorous formalism for the -of electronic excitation energies among the DFT framework for calculating spectral properties of many transition metal complexes<sup>15-18</sup>. In order to acquire the information and nature of absorption and emission processes natural transition orbital (NTO) analysis was executed. This method delivers the most accurate representation of the transition density between the ground and excited states in terms of an expansion into single-particle transitions (hole and

electron states for each given excitation). we refer to the unoccupied and occupied NTOs as “electron” and “hole” transition orbitals. The computed vertical transitions were calculated at the equilibrium geometry of the  $S_0$  state and described in terms of one-electron excitations of molecular orbitals of the corresponding  $S_0$  geometry. The calculated transitions with moderate intensities ( $f \geq 0.02$ ) can be envisaged going from the lower to the higher energy region of the spectrum. The rhodium atom was described by a double- $\zeta$  basis set with the effective core potential of Hay and Wadt (LANL2DZ)<sup>19,20</sup>, and the 6-311++G(d,p)<sup>21,22</sup> basis set was used for the other elements except hydrogen atom (6-31G) present in the complexes to optimize the ground state geometries. The calculated electronic density plots for frontier molecular orbitals were prepared by using the GaussView 6.0 software. GaussSum program, version 3.2<sup>23</sup>, was used to calculate the molecular orbital contributions from groups or atoms.

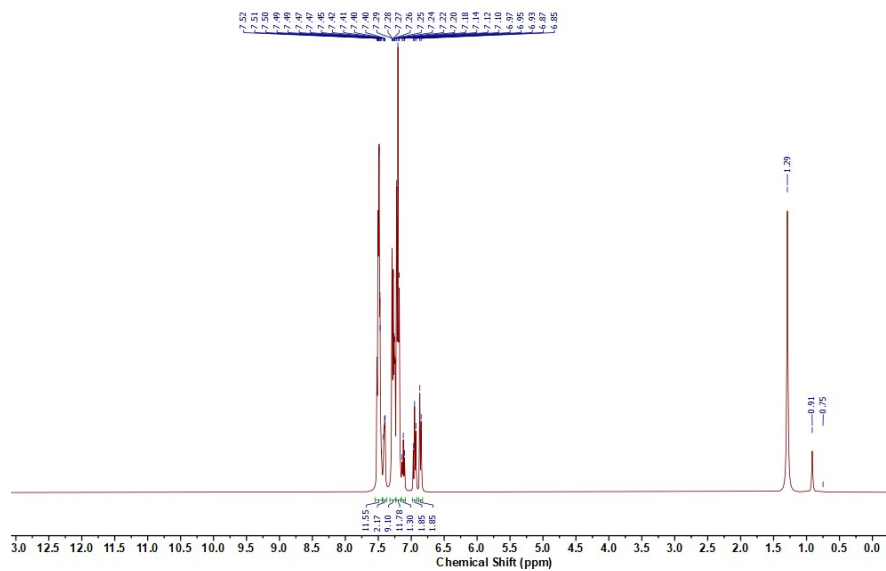

Figure S3:  $^1\text{H}$  NMR spectrum of **1a**

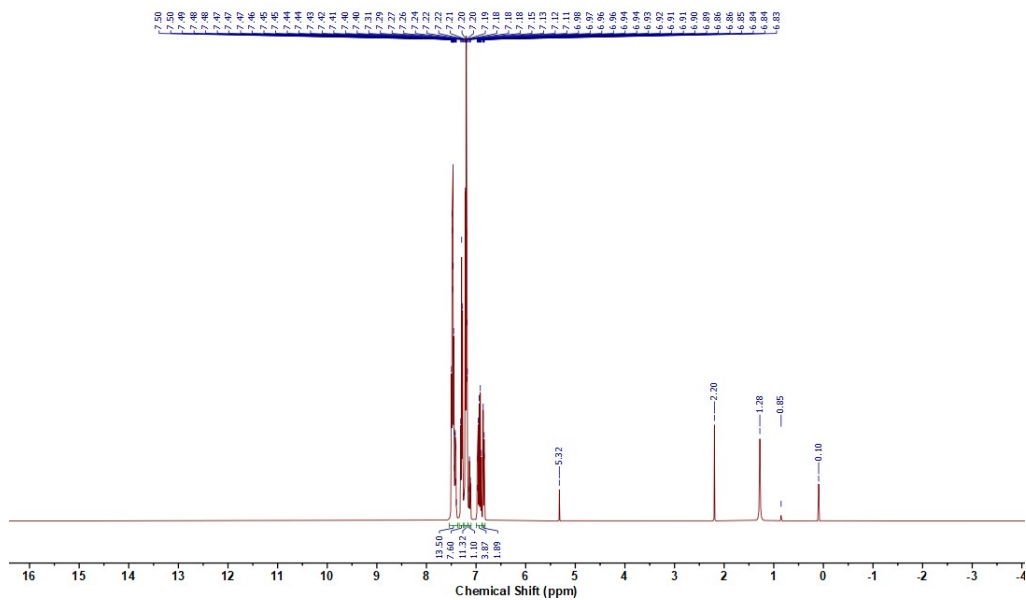

Figure S4:  $^1\text{H}$  NMR spectrum of **2a**

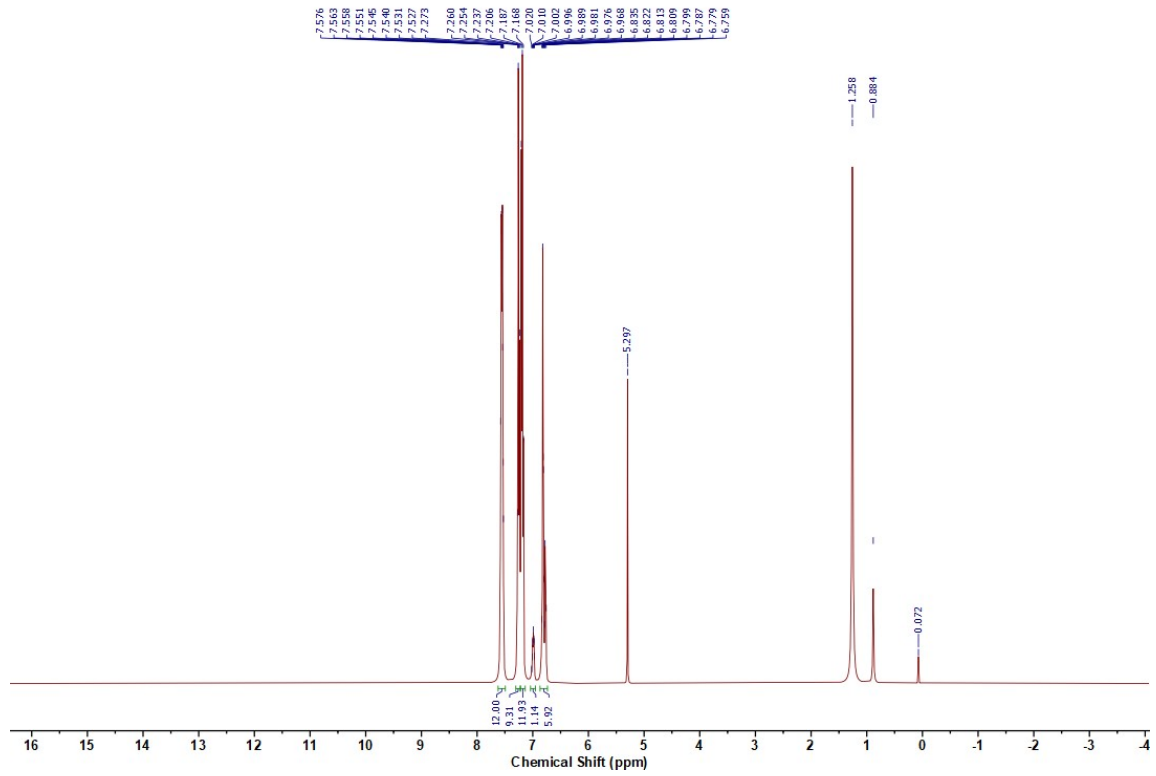

Figure S5:  $^1\text{H}$  NMR spectrum of **3a**

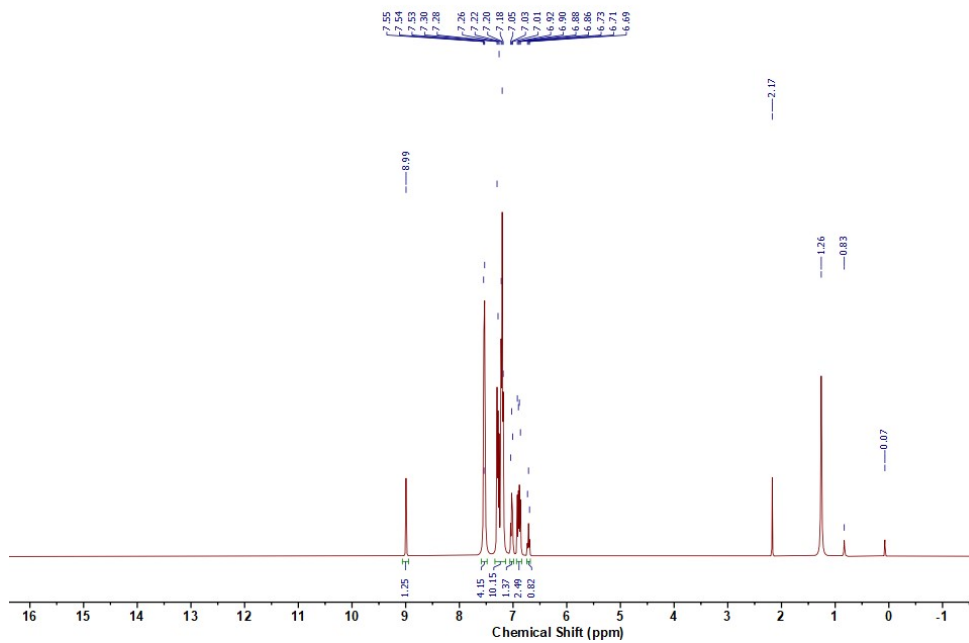

Figure S6:  $^1\text{H}$  NMR spectrum of **4a**

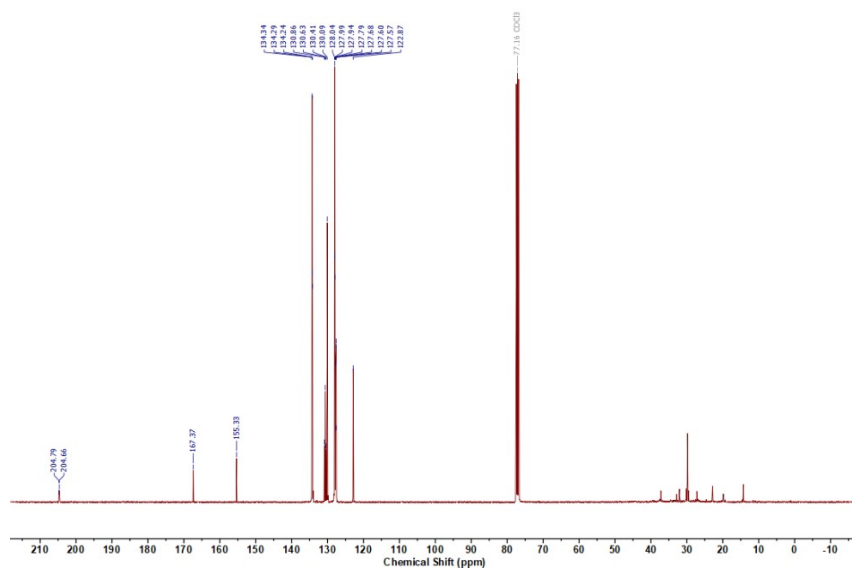

Figure S7:  $^{13}\text{C}$  NMR spectrum of **1a**

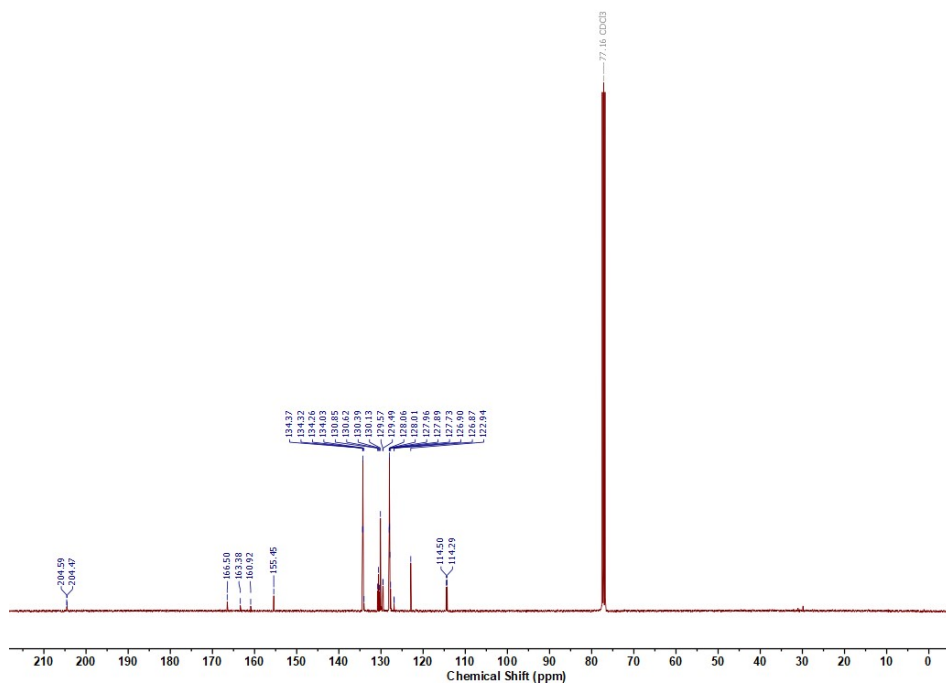

**Figure S8:**  $^{13}\text{C}$  NMR spectrum of **2a**

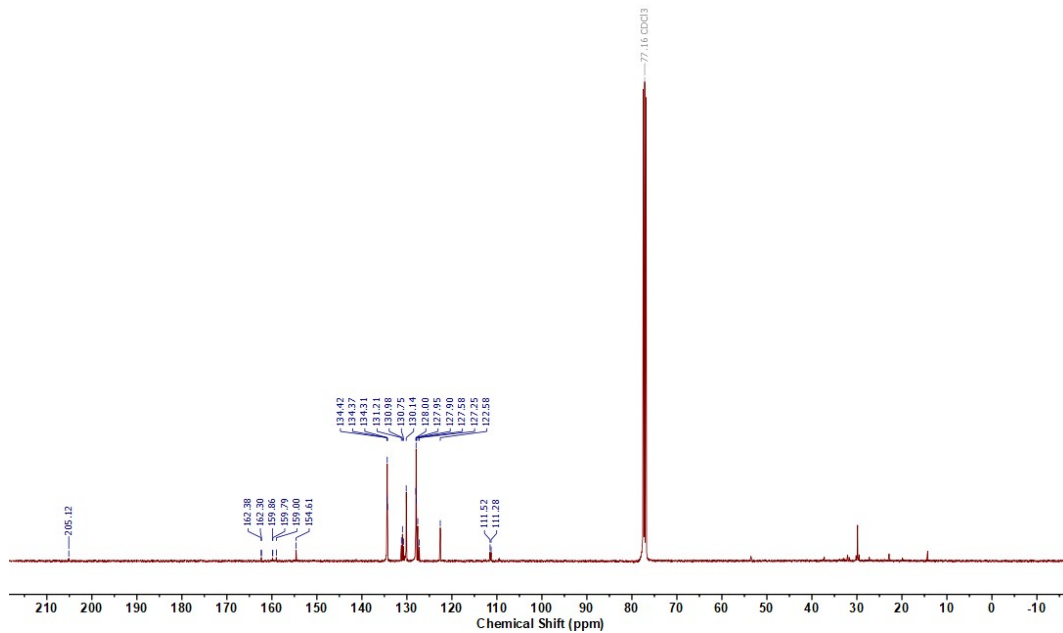

**Figure S9:**  $^{13}\text{C}$  NMR spectrum of **3a**

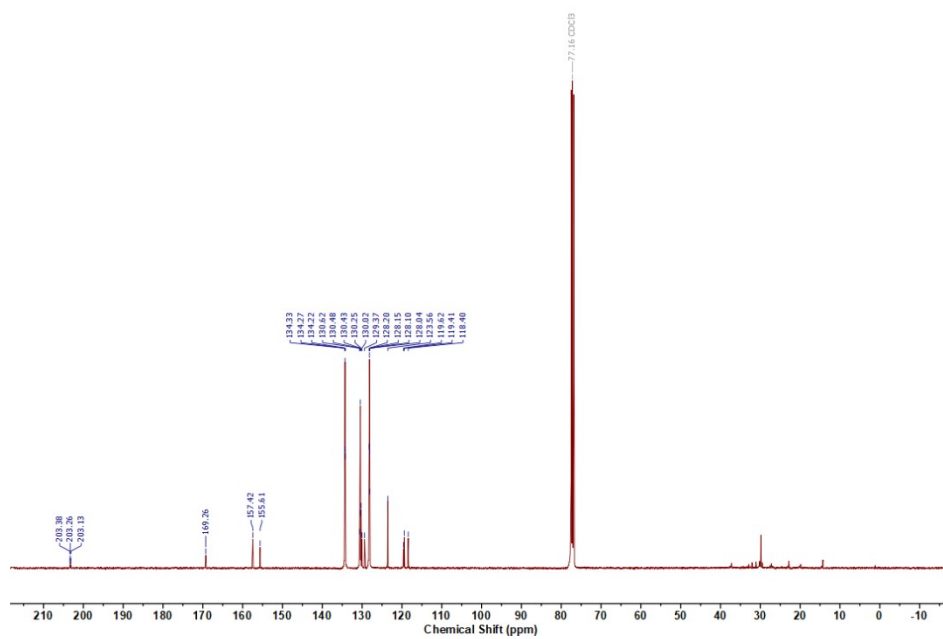

**Figure S10:**  $^{13}\text{C}$  NMR spectrum of **4a**



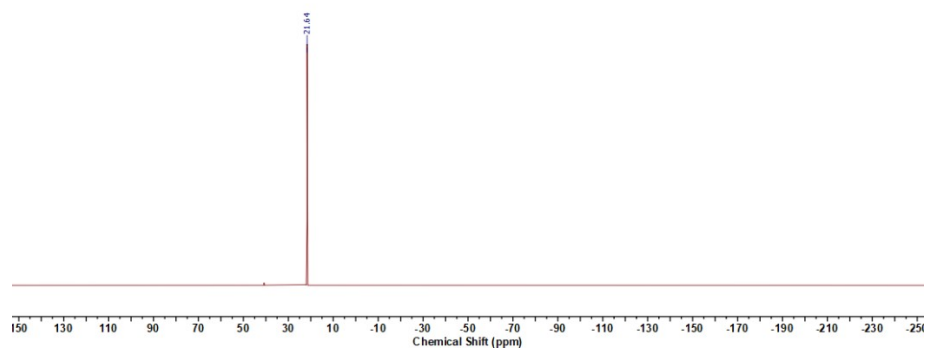

**Figure S11:**  $^{31}\text{P}$  NMR spectrum of **1a**

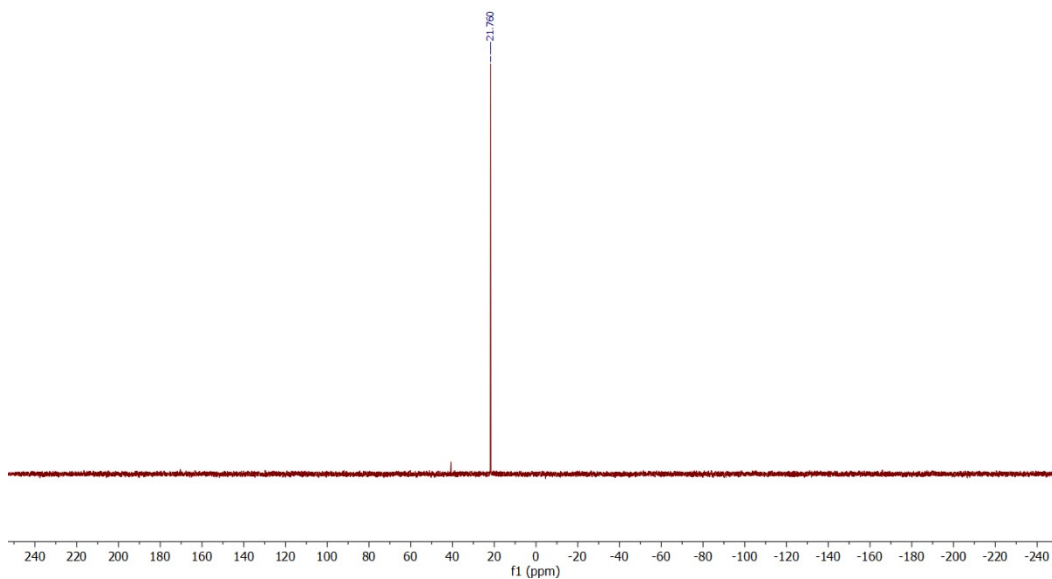

**Figure S12:**  $^{31}\text{P}$  NMR spectrum of **2a**

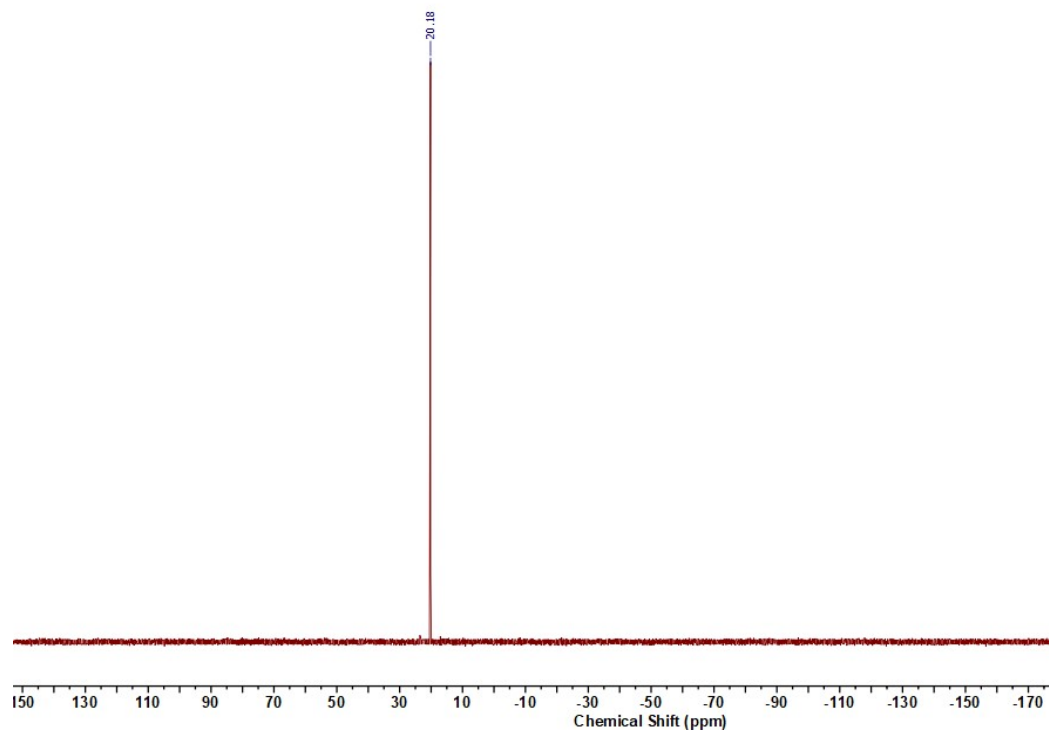

**Figure S13:**  $^{31}\text{P}$  NMR spectrum of **3a**

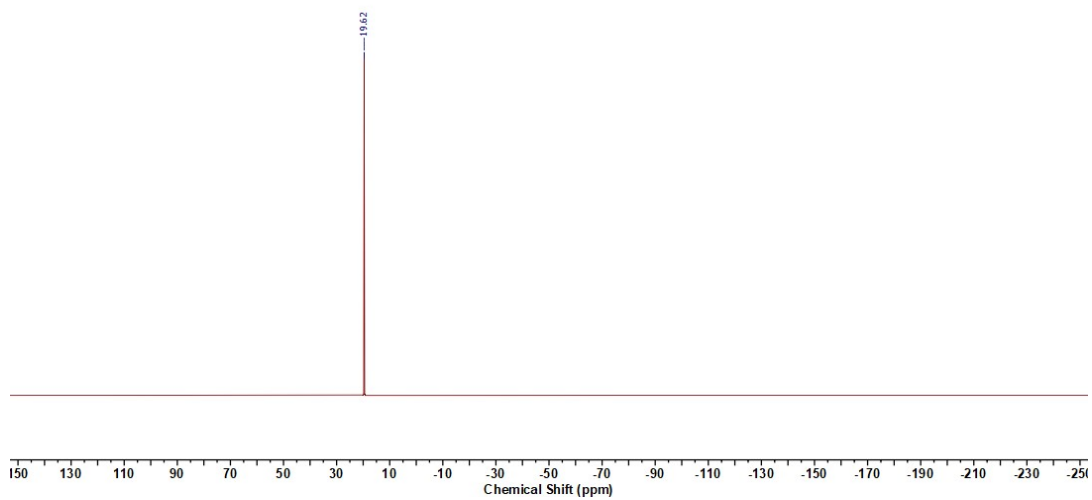

**Figure S14:**  $^{31}\text{P}$  NMR spectrum of **4a**

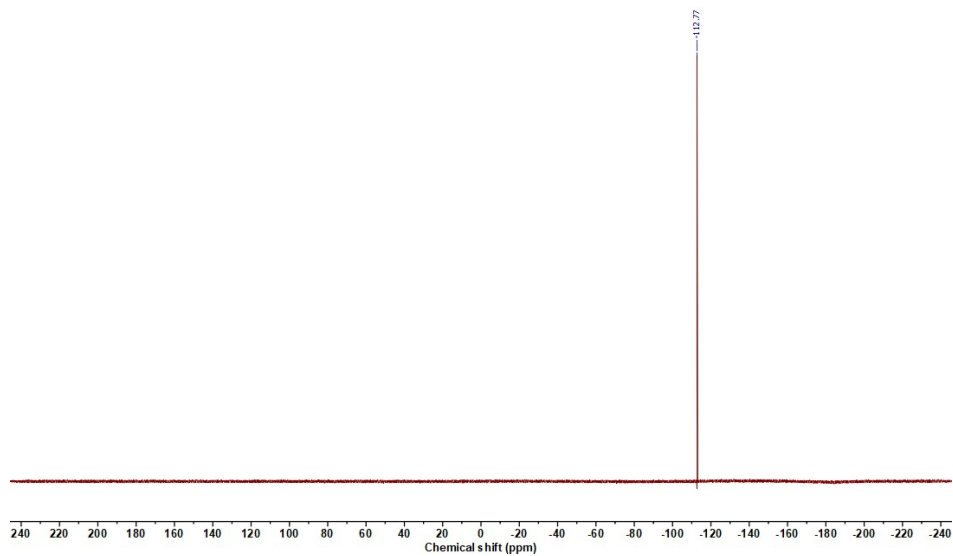

**Figure S15:**  $^{19}\text{F}$  NMR spectrum of **2a**

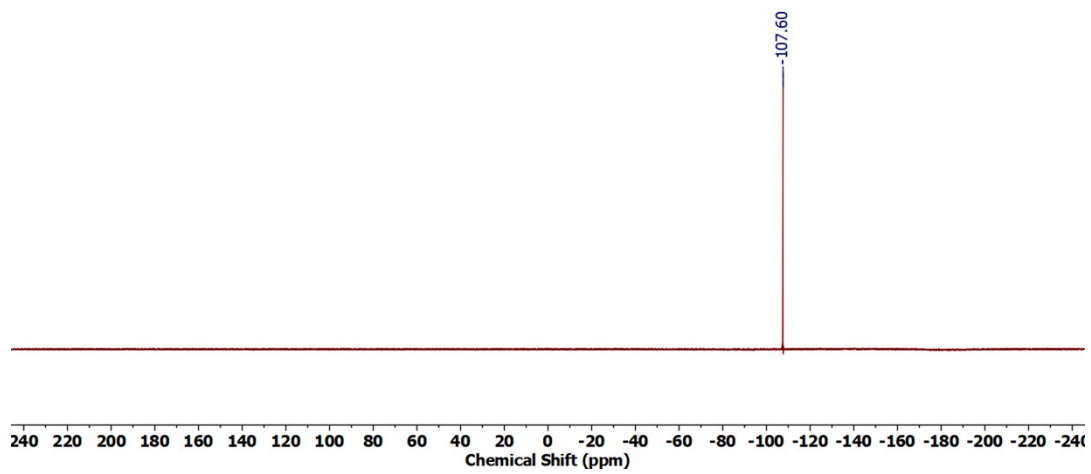

**Figure S16:**  $^{19}\text{F}$  NMR spectrum of **3a**

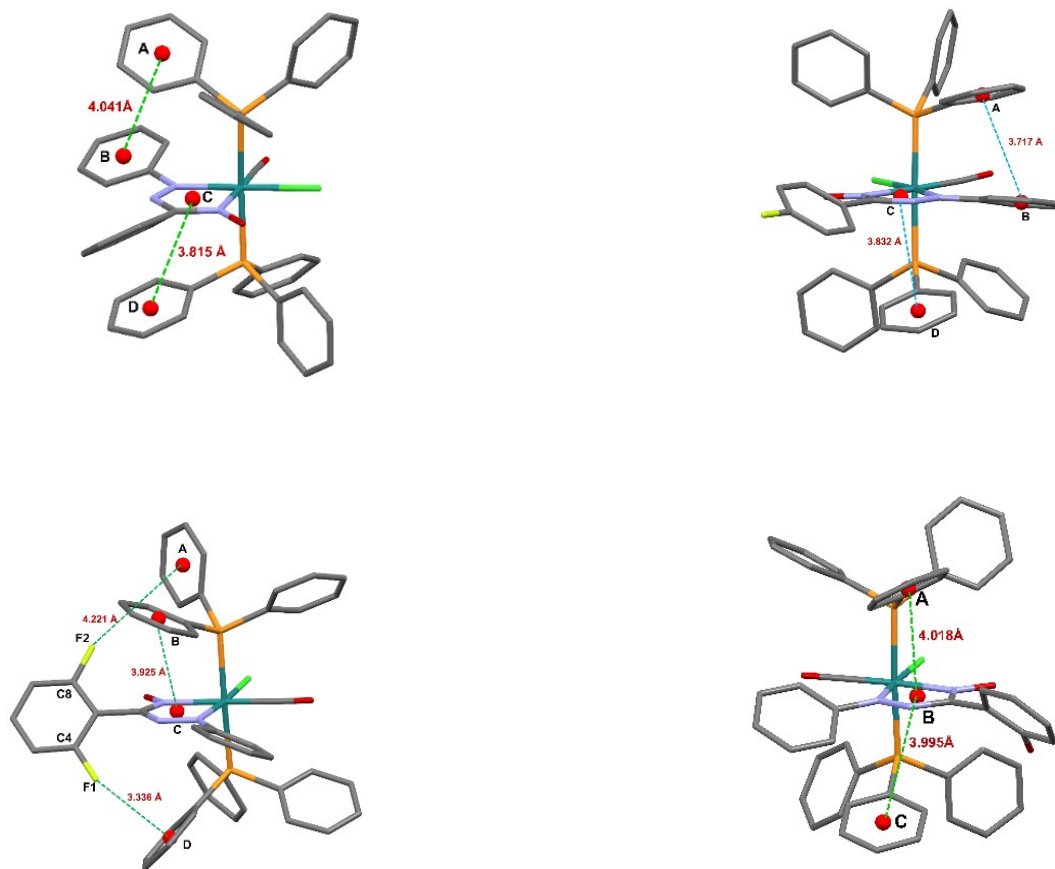

**Figure S16:** Intra-molecular  $\pi$ - $\pi$  stacking and F- $\pi$  interactions in the complex **1a**, **2a**, **3a** and **4a**

**Table S4:** Intra-molecular  $\pi$ - $\pi$  stacking parameter\* of **1a**

| Stacking Parameters                           | Ring A-B         | Ring C-D         |
|-----------------------------------------------|------------------|------------------|
| $d[C_g(I) - C_g(J)] \text{ \AA}/\alpha^\circ$ | 4.041(3)/28.7(2) | 3.815(2)/22.4(2) |
| $d[C_g(I) - R(J)] \text{ \AA}/\beta^\circ$    | 3.575(2)/33.8    | 3.574(2)/40.6    |
| $d[C_g(J) - R(I)] \text{ \AA}/\gamma^\circ$   | 3.3597(17)/27.8  | 2.8973(14)/20.5  |

**Table S5:** Intra-molecular  $\pi$ - $\pi$  stacking parameter\* of **2a**

| Stacking Parameters                           | Ring A-B         | Ring C-D        |
|-----------------------------------------------|------------------|-----------------|
| $d[C_g(I) - C_g(J)] \text{ \AA}/\alpha^\circ$ | 3.717(3)/15.0(2) | 3.832(2)/22.5   |
| $d[C_g(I) - R(J)] \text{ \AA}/\beta^\circ$    | 3.6640(19)/24.5  | 2.9612(13)/21.5 |

|                                                          |              |               |
|----------------------------------------------------------|--------------|---------------|
| $d[\text{Cg}(J) - \text{R}(I)] \text{ \AA}/\gamma^\circ$ | 3.383(2)/9.7 | 3.566(2)/39.4 |
|----------------------------------------------------------|--------------|---------------|

**Table S6:** Intramolecular  $\pi$ - $\pi$  stacking parameter\* of **3a**

| Stacking Parameters                                         | Ring B–C             |
|-------------------------------------------------------------|----------------------|
| $d[\text{C}_g(I) - \text{C}_g(J)] \text{ \AA}/\alpha^\circ$ | 3.9251(19)/24.65(16) |
| $d[\text{Cg}(I) - \text{R}(J)] \text{ \AA}/\beta^\circ$     | 3.0073(10)/22.1      |
| $d[\text{Cg}(J) - \text{R}(I)] \text{ \AA}/\gamma^\circ$    | 3.6371/40.0          |

**Table S7:** Intra-molecular  $\pi$ - $\pi$  stacking parameter\* of **4a**

| Stacking Parameters                                         | Ring A–B             | Ring C–D             |
|-------------------------------------------------------------|----------------------|----------------------|
| $d[\text{C}_g(I) - \text{C}_g(J)] \text{ \AA}/\alpha^\circ$ | 4.0174(15)/23.29(12) | 3.9945(15)/30.76(12) |
| $d[\text{Cg}(I) - \text{R}(J)] \text{ \AA}/\beta^\circ$     | 2.9498(8)/23.3       | 3.7882(12)/43.1      |
| $d[\text{Cg}(J) - \text{R}(I)] \text{ \AA}/\gamma^\circ$    | 3.6899(12)/42.8      | 2.9184(8)/18.5       |

\* $\text{C}_g(I)$  = Centroid of ring  $I$ ,  $\text{C}_g(J)$  = Centroid of ring  $J$ ,  $d[\text{C}_g(I) - \text{C}_g(J)]$  = Separation between two ring centroids,  $d[\text{Cg}(I) - \text{R}(J)]$  = Perpendicular distance of  $\text{C}_g(I)$  on ring  $J$ ,  $d[\text{Cg}(J) - \text{R}(I)]$  = Perpendicular distance of  $\text{C}_g(J)$  on ring  $I$ ,  $\alpha$  = Dihedral angle between Planes  $I$  of ring  $I$  and plane  $J$  of ring  $J$ ,  $\beta$  and  $\gamma$  = Angle between the vector  $\text{C}_g(I) - \text{C}_g(J)$  and the normal to plane  $P(I)$  or  $P(J)$  from  $\text{C}_g(I)$  and  $\text{C}_g(J)$  respectively.

**Table S8:** Intramolecular F –  $\pi$  interaction parameter<sup>a</sup> of **3a**

| Bond (X–Y) | $d[(\text{C}_g(I) - \text{Y})/\text{\AA}]$ | X–Y... $\text{C}_g(I)$ /deg | $d[\text{X}-\text{C}_g(I)]/\text{\AA}$ |
|------------|--------------------------------------------|-----------------------------|----------------------------------------|
| C4–F1      | 3.336(3)                                   | 136.5(2)                    | 4.405                                  |

<sup>a</sup> $d[(\text{C}_g(I) - \text{Y})]$  = Distance between centroid of ring  $I$  ( $\text{C}_g$ ) and Y, X–Y... $\text{C}_g(I)$  = Angle between  $\text{C}_g$ -Y vector and ring  $I$  normal in degree,  $d[\text{Y}-\text{C}_g(I)]$  = Distance between centroid of ring  $I$  ( $\text{C}_g$ ) and X

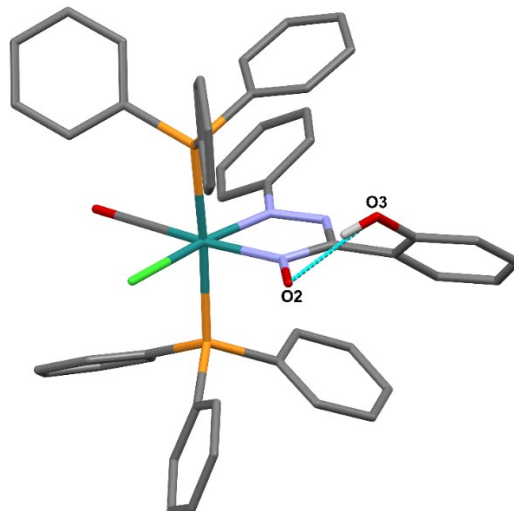

**Figure S17:** Intramolecular H-Bonding in **4a**

**Table S9:** Hydrogen bonding parameter of **4a**

| Type of H-Bonding | Donor (D) | Acceptor (A) | D – A(Å) | D–H.....A(deg) |
|-------------------|-----------|--------------|----------|----------------|
| Intra-molecular   | O3        | O2           | 2.598(4) | 155            |

**Table S10:** Frontier Molecular Orbital Composition (%) in the ground state for complex **1a**

| Orbital | MO   | Energy (eV) | Contribution (%) |    |    |     |       |    |                  | Contribution                                                      |
|---------|------|-------------|------------------|----|----|-----|-------|----|------------------|-------------------------------------------------------------------|
|         |      |             | Ru               | Cl | CO | Azo | Oxime | Ph | PPh <sub>3</sub> |                                                                   |
| 226     | L+5  | -0.92       | 4                | 1  | 2  | 0   | 2     | 9  | 83               | $\pi^*(\text{Oxime} + \text{PPh}_3)$                              |
| 225     | L+4  | -0.98       | 1                | 0  | 1  | 1   | 1     | 4  | 91               | $\pi^*(\text{Ph} + \text{PPh}_3)$                                 |
| 224     | L+3  | -1.07       | 2                | 0  | 1  | 0   | 0     | 2  | 94               | $\pi^*(\text{PPh}_3)$                                             |
| 223     | L+2  | -1.09       | 3                | 0  | 3  | 0   | 4     | 11 | 79               | $\pi^*(\text{Ph} + \text{PPh}_3)$                                 |
| 222     | L+1  | -1.65       | 32               | 3  | 1  | 2   | 3     | 0  | 60               | $d_z^2 + \pi^*(\text{PPh}_3)$                                     |
| 221     | LUMO | -2.61       | 6                | 0  | 2  | 35  | 39    | 13 | 4                | $\pi^*(\text{Azo} + \text{Oxime} + \text{Ph})$                    |
| 220     | HOMO | -5.51       | 14               | 5  | 0  | 11  | 38    | 30 | 3                | $d_{xy} + \pi(\text{Azo} + \text{Oxime} + \text{Ph})$             |
| 219     | H-1  | -6.00       | 24               | 39 | 4  | 2   | 24    | 4  | 4                | $d_{x^2-z^2} + \pi(\text{Azo} + \text{Oxime} + \text{Ph})$        |
| 218     | H-2  | -6.11       | 20               | 47 | 1  | 3   | 10    | 9  | 10               | $d_{xz} + \pi(\text{Cl} + \text{Azo} + \text{Oxime} + \text{Ph})$ |
| 217     | H-3  | -6.34       | 9                | 31 | 5  | 3   | 48    | 3  | 2                | $d_{xz} + \pi(\text{Cl} + \text{Ph})$                             |
| 216     | H-4  | -6.51       | 13               | 1  | 0  | 3   | 1     | 7  | 76               | $d_{xz} + \pi(\text{Ph} + \text{PPh}_3)$                          |
| 215     | H-5  | -6.80       | 0                | 2  | 0  | 2   | 1     | 89 | 6                | $\pi(\text{Ph} + \text{PPh}_3)$                                   |

**Table S11:** Frontier Molecular Orbital Composition (%) in the ground state for complex **2a**

| Orbital | MO   | Energy (eV) | Contribution (%) |    |    |     |       |    | Contribution |                                                                     |
|---------|------|-------------|------------------|----|----|-----|-------|----|--------------|---------------------------------------------------------------------|
|         |      |             | Ru               | Cl | CO | Azo | Oxime | Ph |              | PPh <sub>3</sub>                                                    |
| 230     | L+5  | -0.99       | 9                | 2  | 3  | 2   | 8     | 31 | 46           | $d_{x^2-z^2} + \pi^*(\text{Oxime} + \text{Ph} + \text{PPh}_3)$      |
| 229     | L+4  | -1.01       | 2                | 0  | 2  | 0   | 1     | 2  | 93           | $\pi^*(\text{PPh}_3)$                                               |
| 228     | L+3  | -1.13       | 2                | 0  | 2  | 2   | 0     | 4  | 95           | $\pi^*(\text{PPh}_3)$                                               |
| 227     | L+2  | -1.25       | 0                | 0  | 2  | 1   | 1     | 0  | 96           | $\pi^*(\text{PPh}_3)$                                               |
| 226     | L+1  | -1.71       | 32               | 3  | 2  | 3   | 1     | 0  | 60           | $d_z^2 + \pi^*(\text{PPh}_3)$                                       |
| 225     | LUMO | -2.69       | 6                | 0  | 2  | 35  | 38    | 15 | 4            | $\pi^*(\text{Azo} + \text{Oxime} + \text{Ph})$                      |
| 224     | HOMO | -5.58       | 14               | 5  | 0  | 10  | 38    | 30 | 3            | $d_{xz} + \pi(\text{Azo} + \text{Oxime} + \text{Ph})$               |
| 223     | H-1  | -6.08       | 25               | 42 | 4  | 2   | 19    | 4  | 6            | $d_{xy} + \pi(\text{Azo} + \text{Oxime} + \text{Ph})$               |
| 222     | H-2  | -6.14       | 20               | 44 | 2  | 3   | 15    | 7  | 10           | $d_{yz} + \pi(\text{Cl} + \text{Oxime} + \text{Ph} + \text{PPh}_3)$ |
| 221     | H-3  | -6.46       | 8                | 29 | 6  | 3   | 51    | 2  | 2            | $d_{yz} + \pi(\text{Cl} + \text{CO} + \text{Oxime} + \text{Ph})$    |
| 220     | H-4  | -6.62       | 13               | 0  | 0  | 3   | 1     | 8  | 74           | $d_{xy} + \pi(\text{Ph} + \text{PPh}_3)$                            |
| 219     | H-5  | -6.89       | 0                | 0  | 0  | 0   | 0     | 3  | 96           | $\pi(\text{PPh}_3)$                                                 |

**Table S12:** Frontier Molecular Orbital Composition (%) in the ground state for complex **3a**

| Orbital | MO   | Energy (eV) | Contribution (%) |    |    |     |       |    | Contribution |                                                                   |
|---------|------|-------------|------------------|----|----|-----|-------|----|--------------|-------------------------------------------------------------------|
|         |      |             | Ru               | Cl | CO | Azo | Oxime | Ph |              | PPh <sub>3</sub>                                                  |
| 230     | L+5  | -0.90       | 1                | 1  | 2  | 0   | 4     | 8  | 84           | $\pi^*(\text{PPh}_3)$                                             |
| 229     | L+4  | -0.95       | 3                | 0  | 1  | 1   | 6     | 31 | 60           | $\pi^*(\text{Ph} + \text{PPh}_3)$                                 |
| 228     | L+3  | -1.04       | 4                | 0  | 3  | 1   | 2     | 25 | 64           | $d_{x^2-z^2} + \pi^*(\text{Ph} + \text{PPh}_3)$                   |
| 227     | L+2  | -1.09       | 0                | 0  | 2  | 1   | 1     | 4  | 92           | $\pi^*(\text{PPh}_3)$                                             |
| 226     | L+1  | -1.63       | 35               | 4  | 1  | 3   | 2     | 0  | 57           | $d_z^2 + \pi^*(\text{PPh}_3)$                                     |
| 225     | LUMO | -2.62       | 6                | 0  | 2  | 34  | 39    | 14 | 4            | $d_{xz} + \pi^*(\text{Azo} + \text{Oxime} + \text{Ph})$           |
| 224     | HOMO | -5.68       | 23               | 12 | 0  | 11  | 34    | 16 | 3            | $d_{xz} + \pi(\text{Cl} + \text{Azo} + \text{Oxime} + \text{Ph})$ |
| 223     | H-1  | -6.10       | 27               | 43 | 5  | 1   | 20    | 0  | 3            | $d_{xz} + \pi(\text{Cl} + \text{CO} + \text{Oxime})$              |
| 222     | H-2  | -6.17       | 10               | 43 | 0  | 4   | 11    | 13 | 19           | $d_{yz} + \pi(\text{Cl} + \text{Azo} + \text{Oxime} + \text{Ph})$ |
| 221     | H-3  | -6.43       | 6                | 21 | 5  | 4   | 59    | 1  | 4            | $d_{xz} + \pi(\text{Cl} + \text{Oxime})$                          |
| 220     | H-4  | -6.50       | 14               | 2  | 0  | 3   | 2     | 6  | 73           | $d_{xz} + \pi(\text{PPh}_3)$                                      |
| 219     | H-5  | -6.78       | 1                | 0  | 0  | 0   | 1     | 2  | 96           | $\pi(\text{PPh}_3)$                                               |

**Table S13:** Frontier Molecular Orbital Composition ( $\alpha$ -MO) (%) in the ground state for complex [3a]<sup>-</sup>

| Orbital | MO   | Energy (eV) | Contribution (%) |    |    |     |       |    |                  | Contribution                                           |
|---------|------|-------------|------------------|----|----|-----|-------|----|------------------|--------------------------------------------------------|
|         |      |             | Ru               | Cl | CO | Azo | Oxime | Ph | PPh <sub>3</sub> |                                                        |
| 235     | L+5  | 1.55        | 2                | 0  | 0  | 2   | 1     | 26 | 69               | $\pi^*(\text{Ph} + \text{PPh}_3)$                      |
| 234     | L+4  | 1.46        | 4                | 0  | 0  | 0   | 1     | 0  | 97               | $\pi^*(\text{PPh}_3)$                                  |
| 233     | L+3  | 1.44        | 1                | 0  | 0  | 0   | 3     | 0  | 98               | $\pi^*(\text{PPh}_3)$                                  |
| 232     | L+2  | 1.34        | 2                | 0  | 1  | 0   | 1     | 1  | 95               | $\pi^*(\text{PPh}_3)$                                  |
| 231     | L+1  | 1.20        | 0                | 0  | 0  | 0   | 0     | 1  | 99               | $\pi^*(\text{PPh}_3)$                                  |
| 230     | LUMO | 1.04        | 24               | 2  | 1  | 1   | 1     | 0  | 72               | $d_z^2 + \pi^*(\text{PPh}_3)$                          |
| 229     | HOMO | -1.01       | 6                | 0  | 1  | 35  | 34    | 21 | 3                | $d_{xz} + \pi (\text{Azo} + \text{Oxime} + \text{Ph})$ |
| 228     | H-1  | -2.63       | 13               | 3  | 1  | 13  | 41    | 26 | 3                | $d_{yz} + \pi (\text{Azo} + \text{Oxime} + \text{Ph})$ |
| 227     | H-2  | -2.94       | 7                | 3  | 5  | 2   | 80    | 1  | 1                | $d_{yz} + \pi (\text{CO} + \text{Oxime})$              |
| 226     | H-3  | -3.30       | 33               | 45 | 2  | 2   | 3     | 11 | 4                | $d_{xz} + \pi (\text{Cl} + \text{Oxime} + \text{Ph})$  |
| 225     | H-4  | -3.36       | 38               | 47 | 6  | 2   | 4     | 1  | 1                | $d_{xz} + \pi (\text{Cl} + \text{CO})$                 |
| 224     | H-5  | -3.99       | 15               | 5  | 0  | 2   | 1     | 13 | 66               | $d_{xy} + \pi (\text{Cl} + \text{Ph} + \text{PPh}_3)$  |

**Table S14:** Frontier Molecular Orbital Composition ( $\beta$ -MO) (%) in the ground state for complex [3a]<sup>-</sup>

| Orbital | MO   | Energy (eV) | Contribution (%) |    |    |     |       |    |                  | Contribution                                                       |
|---------|------|-------------|------------------|----|----|-----|-------|----|------------------|--------------------------------------------------------------------|
|         |      |             | Ru               | Cl | CO | Azo | Oxime | Ph | PPh <sub>3</sub> |                                                                    |
| 234     | L+5  | 1.47        | 5                | 1  | 0  | 0   | 2     | 1  | 92               | $\pi^*(\text{PPh}_3)$                                              |
| 233     | L+4  | 1.44        | 1                | 0  | 0  | 0   | 3     | 0  | 98               | $\pi^*(\text{PPh}_3)$                                              |
| 232     | L+3  | 1.36        | 2                | 0  | 1  | 1   | 4     | 2  | 91               | $\pi^*(\text{PPh}_3)$                                              |
| 231     | L+2  | 1.22        | 2                | 0  | 1  | 8   | 9     | 7  | 73               | $\pi^*(\text{Oxime} + \text{PPh}_3)$                               |
| 230     | L+1  | 1.16        | 6                | 1  | 3  | 11  | 16    | 7  | 56               | $\pi^*(\text{Azo} + \text{Oxime} + \text{PPh}_3)$                  |
| 229     | LUMO | 1.00        | 18               | 1  | 1  | 8   | 9     | 5  | 58               | $d_z^2 + \pi^*(\text{Azo} + \text{Oxime} + \text{PPh}_3)$          |
| 228     | HOMO | -2.03       | 8                | 1  | 0  | 22  | 34    | 33 | 2                | $d_{xz} + \pi (\text{Azo} + \text{Oxime} + \text{Ph})$             |
| 227     | H-1  | -2.71       | 6                | 2  | 6  | 2   | 82    | 0  | 1                | $d_{yz} + \pi (\text{Oxime})$                                      |
| 226     | H-2  | -3.35       | 41               | 43 | 1  | 2   | 3     | 5  | 5                | $d_{yz} + \pi (\text{Cl})$                                         |
| 225     | H-3  | -3.93       | 40               | 49 | 7  | 2   | 2     | 0  | 1                | $d_{xz} + \pi (\text{Cl} + \text{CO})$                             |
| 224     | H-4  | -3.95       | 0                | 10 | 2  | 47  | 16    | 16 | 15               | $d_{yz} + \pi (\text{Cl} + \text{Azo} + \text{Oxime} + \text{Ph})$ |
| 223     | H-5  | -3.93       | 8                | 6  | 1  | 14  | 1     | 25 | 44               | $d_{xy} + \pi (\text{Cl} + \text{Azo} + \text{Ph} + \text{PPh}_3)$ |



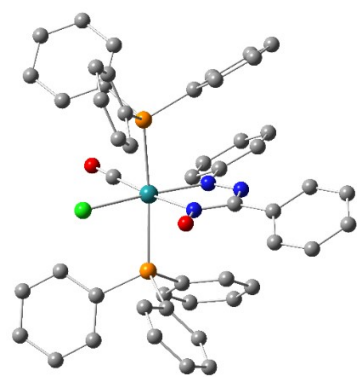

**1a**

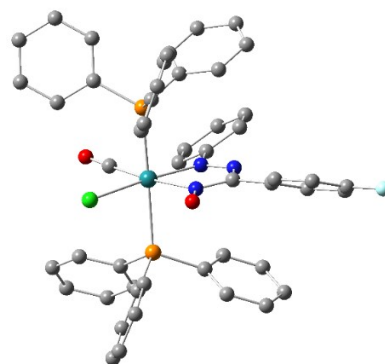

**2a**

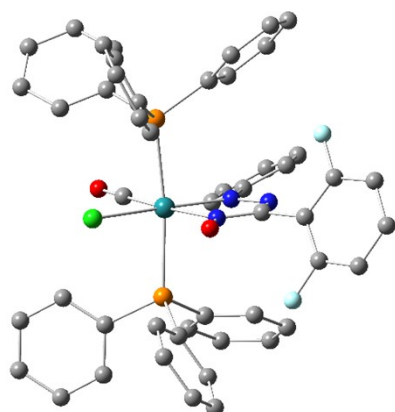

**3a**

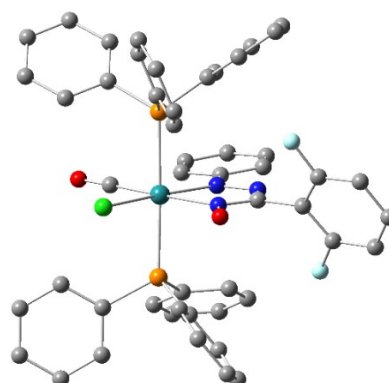

**[3a]<sup>-</sup>**

**Figure S18:** Optimized geometry of **1a**, **2a**, **3a** and **[3a]<sup>-</sup>** calculated at B3LYP/6-311+G(d,p) level of theory.

**Table S15.** Main Optical Transition at the TD-DFT/B3LYP/6-311+G(d,p) Level for the complex **1a** with composition in terms of Molecular Orbital Contribution of the Transition, Computed Vertical Excitation Energies, and Oscillator Strength in Dichloromethane.

| Transition            | CI      | Composition                      | E (eV) | Oscillator strength ( <i>f</i> ) | $\lambda_{\text{theo}}$ (nm) |
|-----------------------|---------|----------------------------------|--------|----------------------------------|------------------------------|
| $S_0 \rightarrow S_2$ | 0.63328 | HOMO $\rightarrow$ LUMO<br>(80%) | 2.4871 | 0.0766                           | 498.50                       |
|                       |         |                                  |        |                                  |                              |

|                          |         |                              |        |        |        |
|--------------------------|---------|------------------------------|--------|--------|--------|
| $S_0 \rightarrow S_5$    | 0.63410 | H-2 $\rightarrow$ LUMO (80%) | 2.9774 | 0.1186 | 416.41 |
|                          |         |                              |        |        |        |
| $S_0 \rightarrow S_{27}$ | 0.49547 | H-3 $\rightarrow$ L+1 (49%)  | 4.0853 | 0.3764 | 303.48 |
|                          |         |                              |        |        |        |
| $S_0 \rightarrow S_{83}$ | 0.32198 | H-4 $\rightarrow$ L+4 (21%)  | 5.0059 | 0.0743 | 247.67 |

**Table S16.** Main Optical Transition at the TD-DFT/B3LYP/6-311+G(d,p) Level for the complex **2a** with composition in terms of Molecular Orbital Contribution of the Transition, Computed Vertical Excitation Energies, and Oscillator Strength in Dichloromethane.

| Transition               | CI      | Composition                   | E (eV) | Oscillator strength ( <i>f</i> ) | $\lambda_{\text{theo}}$ (nm) |
|--------------------------|---------|-------------------------------|--------|----------------------------------|------------------------------|
| $S_0 \rightarrow S_2$    | 0.62095 | HOMO $\rightarrow$ LUMO (77%) | 2.4822 | 0.0634                           | 499                          |
|                          |         |                               |        |                                  |                              |
| $S_0 \rightarrow S_4$    | 0.53343 | H-4 $\rightarrow$ LUMO (57%)  | 2.8956 | 0.0221                           | 428                          |
|                          |         |                               |        |                                  |                              |
| $S_0 \rightarrow S_6$    | 0.67492 | H-3 $\rightarrow$ LUMO (91%)  | 3.1515 | 0.0294                           | 393                          |
|                          |         |                               |        |                                  |                              |
| $S_0 \rightarrow S_{27}$ | 0.39175 | H-3 $\rightarrow$ L+1 (31%)   | 4.1194 | 0.2933                           | 300                          |
|                          |         |                               |        |                                  |                              |
| $S_0 \rightarrow S_{82}$ | 0.41354 | H-3 $\rightarrow$ L+4 (34%)   | 5.0202 | 0.0454                           | 246                          |

**Table S17.** Main Optical Transition at the TD-DFT/B3LYP/6-311+G(d,p) Level for the complex **3a** with composition in terms of Molecular Orbital Contribution of the Transition, Computed Vertical Excitation Energies, and Oscillator Strength in Dichloromethane.

| Transition               | CI      | Composition                   | E (eV) | Oscillator strength ( <i>f</i> ) | $\lambda_{\text{theo}}$ (nm) |
|--------------------------|---------|-------------------------------|--------|----------------------------------|------------------------------|
| $S_0 \rightarrow S_2$    | 0.62256 | HOMO $\rightarrow$ LUMO (78%) | 2.5432 | 0.0612                           | 487.51                       |
|                          |         |                               |        |                                  |                              |
| $S_0 \rightarrow S_5$    | 0.62859 | H-2 $\rightarrow$ LUMO (79%)  | 3.0510 | 0.1255                           | 406.37                       |
|                          |         |                               |        |                                  |                              |
| $S_0 \rightarrow S_{24}$ | 0.34323 | H-2 $\rightarrow$ L+1 (24%)   | 4.0279 | 0.3605                           | 307.81                       |
|                          | 0.40551 | H-3 $\rightarrow$ L+1 (33%)   |        |                                  |                              |
|                          |         |                               |        |                                  |                              |
| $S_0 \rightarrow S_{73}$ | 0.32840 | H-4 $\rightarrow$ L+2 (22%)   | 4.9841 | 0.0193                           | 248.75                       |

**Table S18.** Natural transition orbitals (NTOs) for complex **1a** illustrating the nature of singlet excited states in the absorption bands in the range 200–700 nm. For each state, the respective number of the state, transition energy (eV), and the oscillator strength (in parentheses) are listed. Shown are only occupied (holes) and unoccupied (electrons) NTO pairs that contribute more than 15% to each excited state.

|        |                                                                                                                                                                 | Hole                                                                                | Electron                                                                             |
|--------|-----------------------------------------------------------------------------------------------------------------------------------------------------------------|-------------------------------------------------------------------------------------|--------------------------------------------------------------------------------------|
| 534 nm | $S_2$<br>$w = 0.8020$<br>2.4871 (0.0766)<br>498.50 nm<br>ILCT & d-d<br>$\pi$ (Azo + Oxime) $\rightarrow$ $\pi^*$ (Azo + Oxime)<br>& $d_{xz} \rightarrow d_{yz}$ | 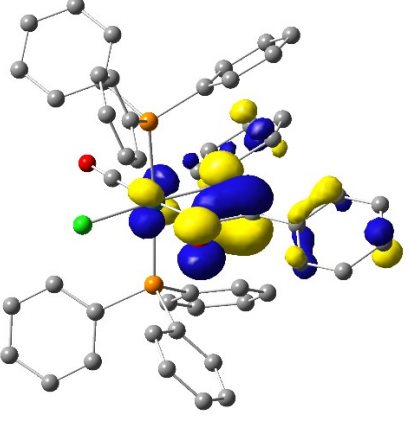 |  |

|                   |                                                                                                                                                                                                                                                         |                                                                                     |                                                                                      |
|-------------------|---------------------------------------------------------------------------------------------------------------------------------------------------------------------------------------------------------------------------------------------------------|-------------------------------------------------------------------------------------|--------------------------------------------------------------------------------------|
| <p>419<br/>nm</p> | <p><math>S_5</math><br/>w = 0.8041<br/>2.9774 (0.1186)<br/>416.41 nm</p> <p>LLCT &amp; d-d<br/><math>\pi(\text{Cl}) \rightarrow \pi^*</math><br/>(Azo + Oxime)<br/>&amp; <math>d_{xz} \rightarrow d_{yz}</math></p>                                     | 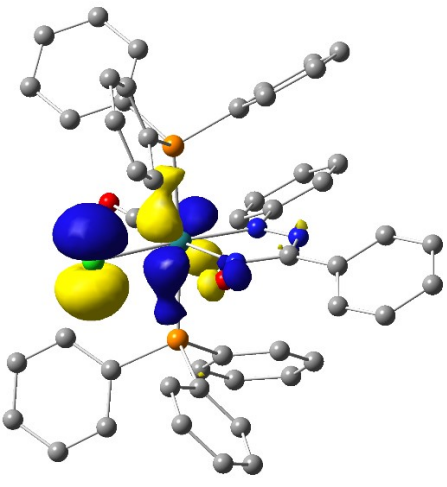   |    |
| <p>277<br/>nm</p> | <p><math>S_{27}</math><br/>w = 0.4909<br/>4.0853 (0.3764)<br/>303.48 nm</p> <p>ILCT, LLCT &amp;<br/>d-d<br/><math>\pi(\text{PPh}_3) \rightarrow \pi^*</math><br/>(Cl + PPh<sub>3</sub>) &amp;<br/><math>d_{yz} \rightarrow d_z^2</math></p>             |   |   |
| <p>232<br/>nm</p> | <p><math>S_{83}</math><br/>w = 0.2073<br/>5.0059 (0.0743)<br/>247.67 nm</p> <p>LLCT &amp; d-d<br/><math>\pi(\text{Cl} + \text{Oxime})</math><br/><math>\rightarrow \pi^*(\text{PPh}_3)</math> &amp;<br/><math>d_{x^2-z^2} \rightarrow d_{xz}</math></p> |  |  |

**Table S19.** Natural transition orbitals (NTOs) for complex **2a** illustrating the nature of singlet excited states in the absorption bands in the range 200–700 nm. For each state, the respective number of the state, transition energy (eV), and the oscillator strength (in parentheses) are listed. Shown are only occupied (holes) and unoccupied (electrons) NTO pairs that contribute more than 15% to each excited state.

|        |                                                                                                                                                                        | Hole                                                                                | Electron                                                                              |
|--------|------------------------------------------------------------------------------------------------------------------------------------------------------------------------|-------------------------------------------------------------------------------------|---------------------------------------------------------------------------------------|
| 528 nm | $S_2$<br>$w = 0.7711$<br>2.4822 (0.0634)<br>499.49 nm<br>ILCT & d-d<br>$\pi$ (Azo + Oxime + Ph) $\rightarrow \pi^*$<br>(Azo + Oxime)<br>& $d_{xz} \rightarrow d_{yz}$  | 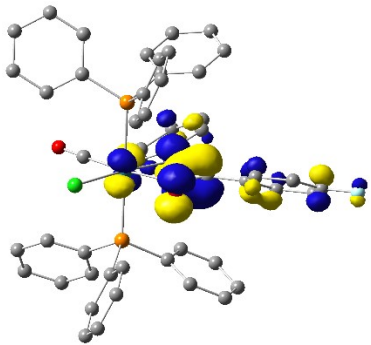  |   |
| 420 nm | $S_4$<br>$w = 0.5689$<br>2.8956 (0.0221)<br>428.18 nm<br>ILCT & d-d<br>$\pi$ (Cl + Oxime) $\rightarrow \pi^*$ (Azo + Oxime + Ph) &<br>$d_{x^2-y^2} \rightarrow d_{yz}$ |  |  |

|                   |                                                                                                                                                                                                                                                                         |                                                                                     |                                                                                       |
|-------------------|-------------------------------------------------------------------------------------------------------------------------------------------------------------------------------------------------------------------------------------------------------------------------|-------------------------------------------------------------------------------------|---------------------------------------------------------------------------------------|
| <p>358<br/>nm</p> | <p><math>S_6</math><br/>w = 0.9110<br/>3.1515 (0.0294)<br/>393.41 nm</p> <p>LLCT &amp; d-d<br/><math>\pi</math> (PPh<sub>3</sub>) <math>\rightarrow</math> <math>\pi^*</math><br/>(Azo + Oxime +<br/>Ph) &amp; <math>d_{xz} \rightarrow d_{yz}</math></p>               | 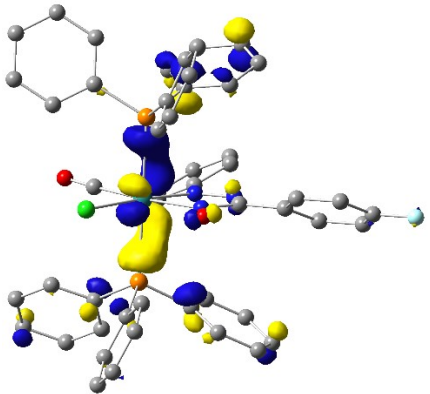   |    |
| <p>279<br/>nm</p> | <p><math>S_{27}</math><br/>w = 0.3069<br/>4.1194 (0.2933)<br/>300.97 nm</p> <p>ILCT &amp; d-d<br/><math>\pi</math> (PPh<sub>3</sub>) <math>\rightarrow</math><br/><math>\pi^*</math> (PPh<sub>3</sub>) &amp; <math>d_{yz}</math><br/><math>\rightarrow d_z^2</math></p> |   |   |
| <p>232<br/>nm</p> | <p><math>S_{82}</math><br/>w = 0.3420<br/>5.0202 (0.0454)<br/>246.97 nm</p> <p>LLCT &amp; d-d<br/><math>\pi</math> (PPh<sub>3</sub>) <math>\rightarrow</math><br/><math>\pi^*</math> (Ph + PPh<sub>3</sub>)<br/>&amp; <math>d_{yz} \rightarrow d_{x^2-y^2}</math></p>   |  |  |

**Table S20.** Natural transition orbitals (NTOs) for complex **3a** illustrating the nature of singlet excited states in the absorption bands in the range 200–700 nm. For each state, the respective number of the state, transition energy (eV), and the oscillator strength (in parentheses) are listed. Shown are only occupied (holes) and unoccupied (electrons) NTO pairs that contribute more than 15% to each excited state.

|           |                                                                                                                                                                                                          | Hole                                                                                | Electron                                                                             |
|-----------|----------------------------------------------------------------------------------------------------------------------------------------------------------------------------------------------------------|-------------------------------------------------------------------------------------|--------------------------------------------------------------------------------------|
| 543<br>nm | $S_2$<br>$w = 0.7751$<br>2.5432 (0.0612)<br>487.51 nm<br><br>ILCT, LLCT &<br>d-d<br><br>$\pi$ (Cl + Azo +<br>Oxime + Ph) $\rightarrow$<br>$\pi^*$ (Azo +<br>Oxime + Ph) &<br>$d_{xz} \rightarrow d_{yz}$ | 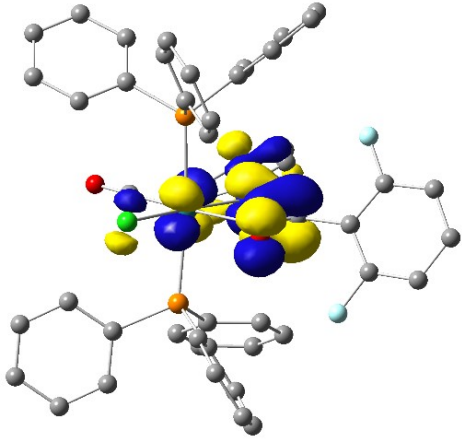  |   |
| 399<br>nm | $S_5$<br>$w = 0.7902$<br>3.0510 (0.1255)<br>406.37 nm<br><br>ILCT, LLCT &<br>d-d<br><br>$\pi$ (Cl + Oxime)<br>$\rightarrow \pi^*$ (Azo +<br>Oxime + Ph) &<br>$d_{xz} \rightarrow d_{yz}$                 |  |  |



|                   |                                                                                                                                                                                                                                                                                                          |                                                                                     |                                                                                      |
|-------------------|----------------------------------------------------------------------------------------------------------------------------------------------------------------------------------------------------------------------------------------------------------------------------------------------------------|-------------------------------------------------------------------------------------|--------------------------------------------------------------------------------------|
| <p>279<br/>nm</p> | <p><math>S_{24}</math><br/>w = 0.3288<br/>4.0279 (0.3605)<br/>307.81 nm</p> <p>ILCT &amp; d-d<br/><math>\pi</math> (Cl + Oxime<br/>+ Ph + PPh<sub>3</sub>) <math>\rightarrow</math><br/><math>\pi^*</math> (Cl + Azo +<br/>Oxime + PPh<sub>3</sub>)<br/>&amp; <math>d_{xz} \rightarrow d_{yz}</math></p> | 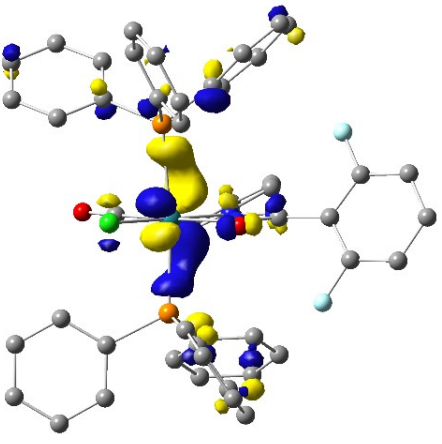   |    |
|                   | <p><math>S_{24}</math><br/>w = 0.2343<br/>4.0279 (0.3605)<br/>307.81 nm</p> <p>ILCT &amp; d-d<br/><math>\pi</math> (Cl + Oxime)<br/><math>\rightarrow \pi^*</math> (Cl +<br/>PPh<sub>3</sub>) &amp; <math>d_{xz} \rightarrow</math><br/><math>d_z^2</math></p>                                           |   |   |
| <p>230<br/>nm</p> | <p><math>S_{73}</math><br/>w = 0.2156<br/>4.9841 (0.0193)<br/>248.75 nm</p> <p>LLCT &amp;<br/>MLCT<br/><math>\pi</math> (Cl + Oxime)<br/><math>\rightarrow \pi^*</math> (PPh<sub>3</sub>)</p>                                                                                                            |  |  |



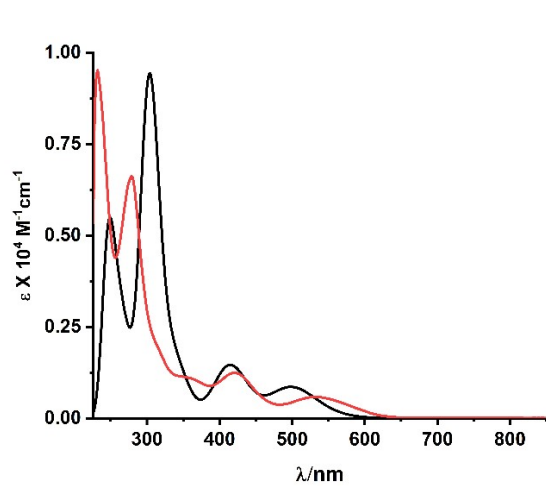

**1a**

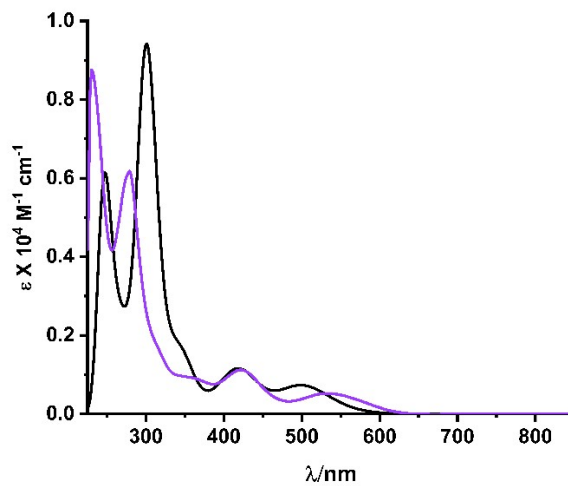

**2a**

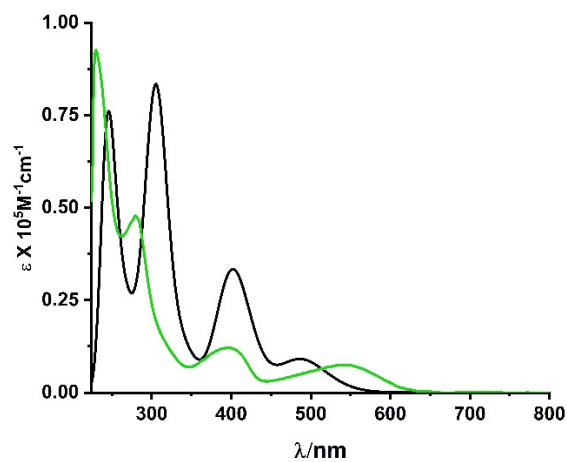

**3a**

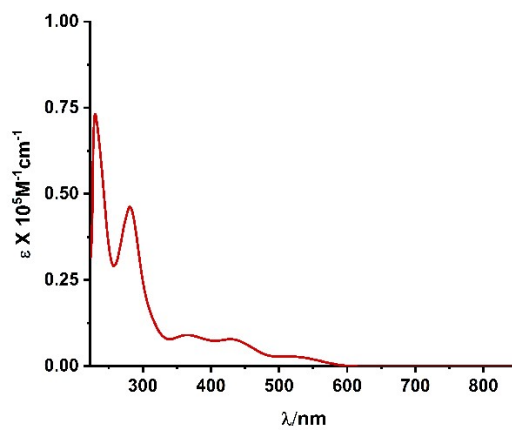

**4a**

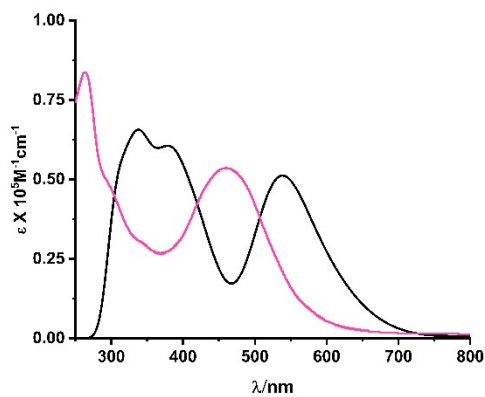

**[3a]<sup>•-</sup>**

**Figure S19:** Experimental (red, violet, green, maroon and pink) and Calculated (black) absorption spectrum of **1a**, **2a**, **3a**, **4a** and **[3a]<sup>•-</sup>**

The UV-VIS absorption spectra of **1a**, **2a** and **3a** were taken in dichloromethane solution at room temperature. All the spectra were plotted together with their respective theoretically calculated spectra (See Figure S20). All complexes exhibit multiple transition and can be assigned as charge transfer (CT) transition within azo-oxime moiety with significant contribution from metal d-orbitals. Time-dependent density functional theory (TD-DFT) in dichloromethane was performed using the CPCM model to realize the absorption spectra. The major transitions along with their corresponding energies, characteristics and oscillator strengths ( $f$ ) of all the complexes have been given in the ESI† (Tables S13, S14, S15†). Natural Transition Orbital (NTO) analysis was utilised to make out the basis of transitions and are represented in ESI† (Table S18, S19, S20†). A compact diagram of transition density amongst the ground and excited states in terms of expansion into single-particle transitions (hole and electron states for each given excitation) is given by this method. The occupied and unoccupied NTO's are epitomized as 'electron' and 'hole'.

In **1a**, the transition at 534 nm is computed to be near  $\lambda_{\text{theo}} = 498$  nm (2.4871 eV,  $f = 0.0766$ ) and ascribed as mainly  $[\pi(\text{azo} + \text{oxime}) \rightarrow \pi^*(\text{azo} + \text{oxime}) + d_{xz} \rightarrow d_{yz}]$  ILCT with little d-d transition. The next band at 419 nm is quantified at near about  $\lambda_{\text{theo}} = 416$  nm (2.9774 eV,  $f = 0.1186$ ) and assigned as  $[\pi(\text{Cl}) \rightarrow \pi^*(\text{azo} + \text{oxime})]$  LLCT transition along with some amount d-d transition. The band near UV region is observed at 277 nm which is calculated at  $\lambda_{\text{theo}} = 303$  nm (4.0853 eV,  $f = 0.3764$ ), having  $[\pi(\text{PPh}_3) \rightarrow \pi^*(\text{Cl} + \text{PPh}_3) + d_{yz} \rightarrow d_z^2]$  ILCT combined with LLCT and d-d transition. The band at very near to UV region is detected at 232 nm which is evaluated at  $\lambda_{\text{theo}} = 247$  nm (5.0059 eV,  $f = 0.0743$ ), having  $[\pi(\text{Cl} + \text{Oxime}) \rightarrow \pi^*(\text{PPh}_3) + d_x^2 - y^2 \rightarrow d_{xz}]$  LLCT with slight contribution from d-d transition.

In **2a**, the lowest energy band at 528 nm is computed to be near  $\lambda_{\text{theo}} = 499$  nm (2.4822 eV,  $f = 0.0634$ ) and assigned as primarily  $[\pi(\text{Azo} + \text{Oxime} + \text{Ph}) \rightarrow \pi^*(\text{Azo} + \text{oxime}) + d_{xz} \rightarrow d_{yz}]$  ILCT with small amount of d-d transition. The next following band at 420 nm is determined at close to  $\lambda_{\text{theo}} = 428$  nm (2.8956 eV,  $f = 0.0221$ ) and assigned as  $[\pi(\text{Cl} + \text{Oxime}) \rightarrow \pi^*(\text{Azo} + \text{Oxime} + \text{Ph}) + d_x^2 - y^2 \rightarrow d_{yz}]$  ILCT transition with some contribution from d-d transition. The band near UV region is observed at 358 nm which is calculated at  $\lambda_{\text{theo}} = 393$  nm (3.1515 eV,  $f = 0.0294$ ), having  $[\pi(\text{PPh}_3) \rightarrow \pi^*(\text{Azo} + \text{Oxime} + \text{Ph}) + d_{xz} \rightarrow d_{yz}]$  LLCT combined with LLCT and d-d transition. The band at near to UV region is detected at 279 nm which is evaluated at  $\lambda_{\text{theo}} = 300$  nm (4.1194 eV,  $f = 0.2933$ ), having  $[\pi(\text{PPh}_3) \rightarrow \pi^*(\text{PPh}_3) + d_{yz} \rightarrow d_z^2]$  ILCT with little contribution from d-d transition. Another band at near about UV region is computed at 232 nm and quantified

at  $\lambda_{\text{theo}} = 246 \text{ nm}$  ( $5.0202 \text{ eV}$ ,  $f = 0.0454$ ), having  $[\pi(\text{PPh}_3) \rightarrow \pi^*(\text{Ph} + \text{PPh}_3) + d_{yz} \rightarrow d_x^2-y^2]$  LLCT together with d-d transition.

For **3a**, the band with lowest energy is observed at 543 nm which is enumerated at  $\lambda_{\text{theo}} = 487 \text{ nm}$  ( $2.5432 \text{ eV}$ ,  $f = 0.0612$ ) and can be ascribed as mostly  $[\pi(\text{Cl} + \text{Azo} + \text{Oxime} + \text{Ph}) \rightarrow \pi^*(\text{Azo} + \text{Oxime} + \text{Ph}) + d_{xz} \rightarrow d_{yz}]$  ILCT, LLCT as well as small amount of d-d transition. The next band appeared at 399 nm which is calculated at  $\lambda_{\text{theo}} = 406 \text{ nm}$  ( $3.0510 \text{ eV}$ ,  $f = 0.1255$ ) and can be ascribed as typically  $[\pi(\text{Cl} + \text{Oxime}) \rightarrow \pi^*(\text{Azo} + \text{Oxime} + \text{Ph}) + d_{xz} \rightarrow d_{yz}]$  ILCT, LLCT along with minute amount of d-d transition. The band at 279 nm which composed with two transitions computed at  $\lambda_{\text{theo}} = 307 \text{ nm}$  ( $4.0279 \text{ eV}$ ,  $f = 0.3605$ ). The first transition can be assessed as mostly  $[\pi(\text{Cl} + \text{Oxime} + \text{Ph} + \text{PPh}_3) \rightarrow \pi^*(\text{Cl} + \text{Azo} + \text{Oxime} + \text{PPh}_3) + d_{xz} \rightarrow d_{yz}]$  ILCT and d-d transition while the another one may be designated as  $[\pi(\text{Cl} + \text{Oxime}) \rightarrow \pi^*(\text{Cl} + \text{PPh}_3) + d_{xz} \rightarrow d_z^2]$  ILCT and d-d transition. The last band at 230 nm is determined at  $\lambda_{\text{theo}} = 248 \text{ nm}$  ( $4.9841 \text{ eV}$ ,  $f = 0.0193$ ) and can be attributed as  $[\pi(\text{Cl} + \text{Oxime}) \rightarrow \pi^*(\text{PPh}_3)]$  ILCT, LLCT and MLCT.

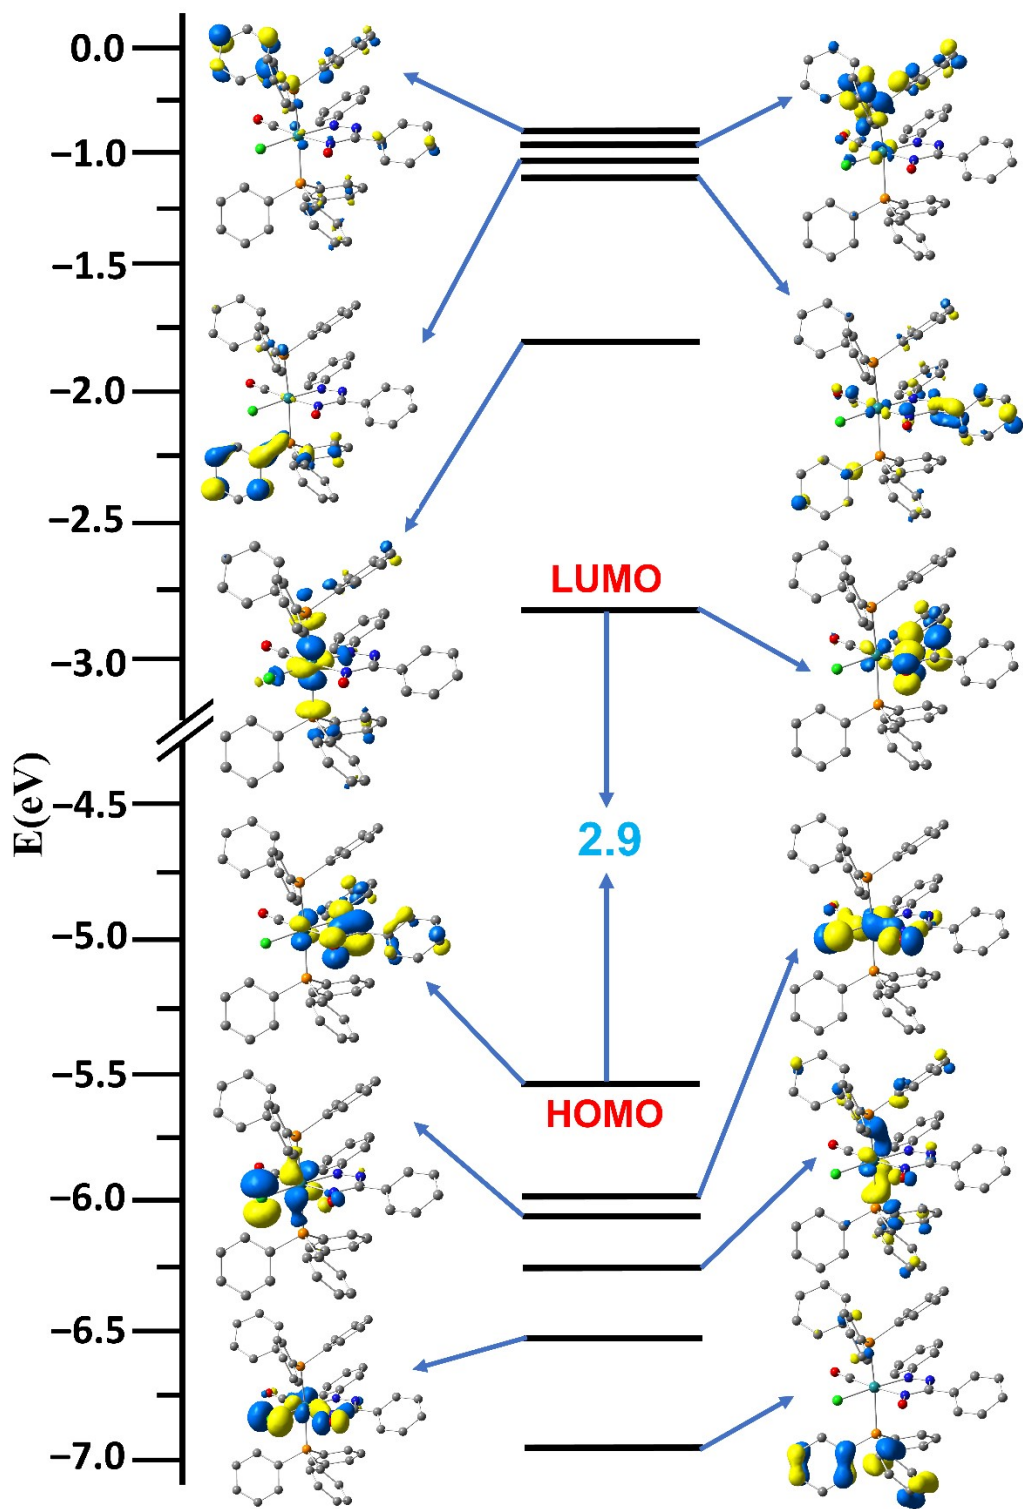

Figure S20: Partial MO diagram of 1a

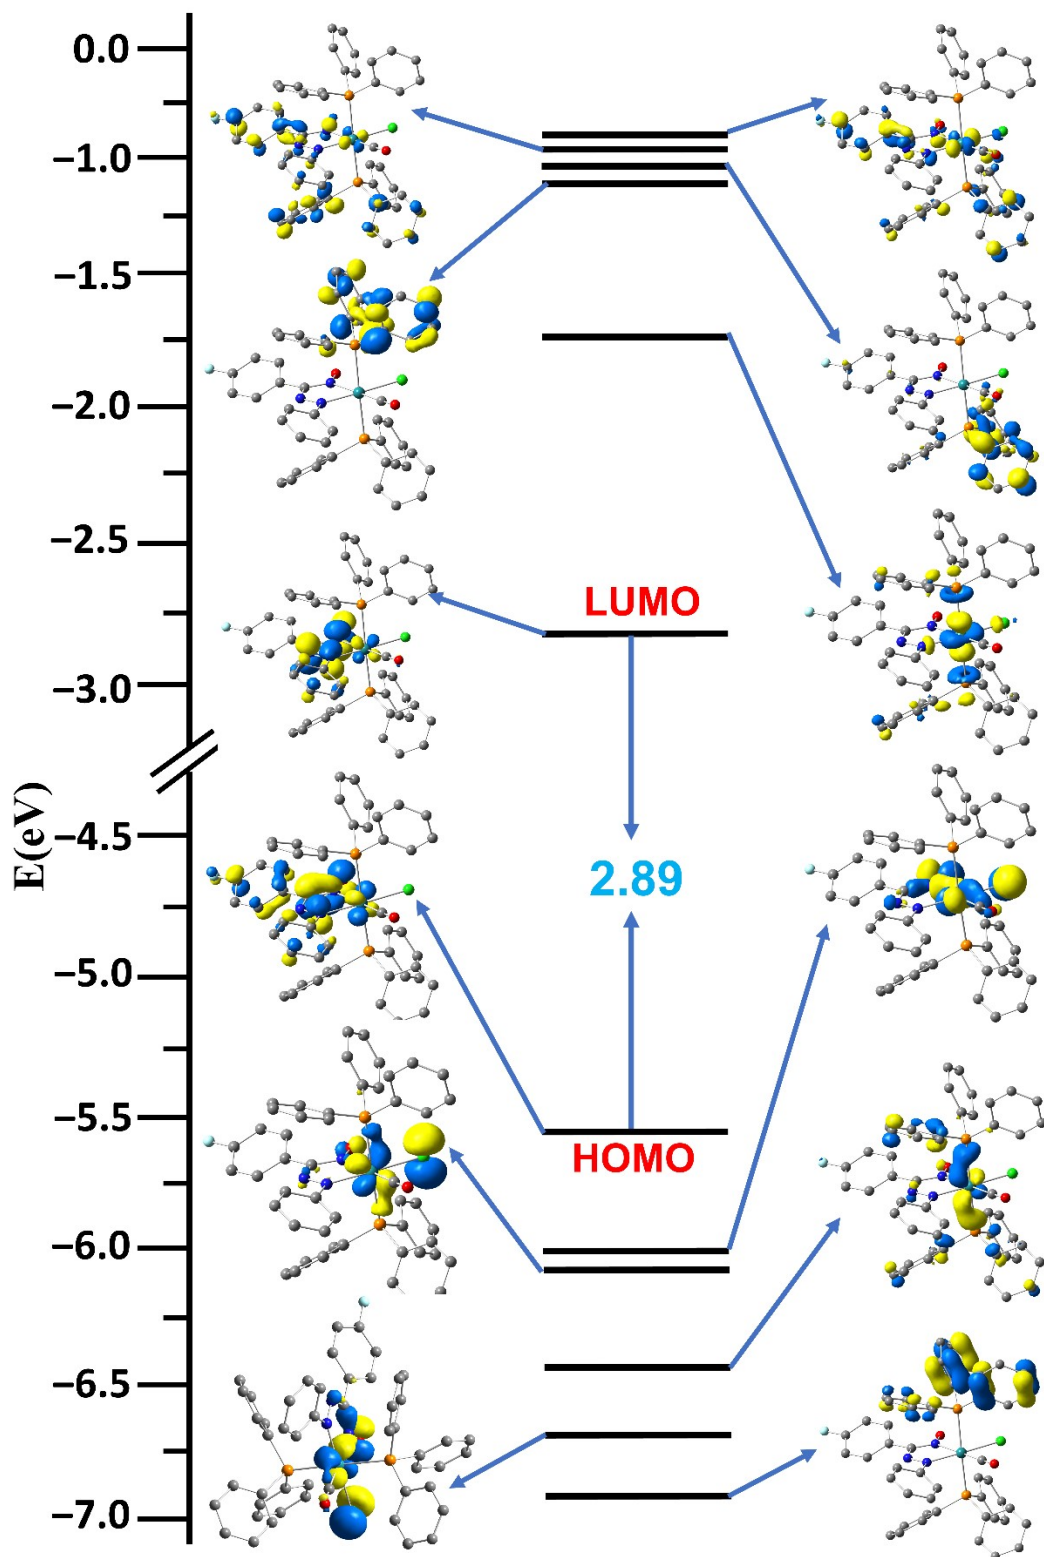

Figure S21: Partial MO diagram of 2a

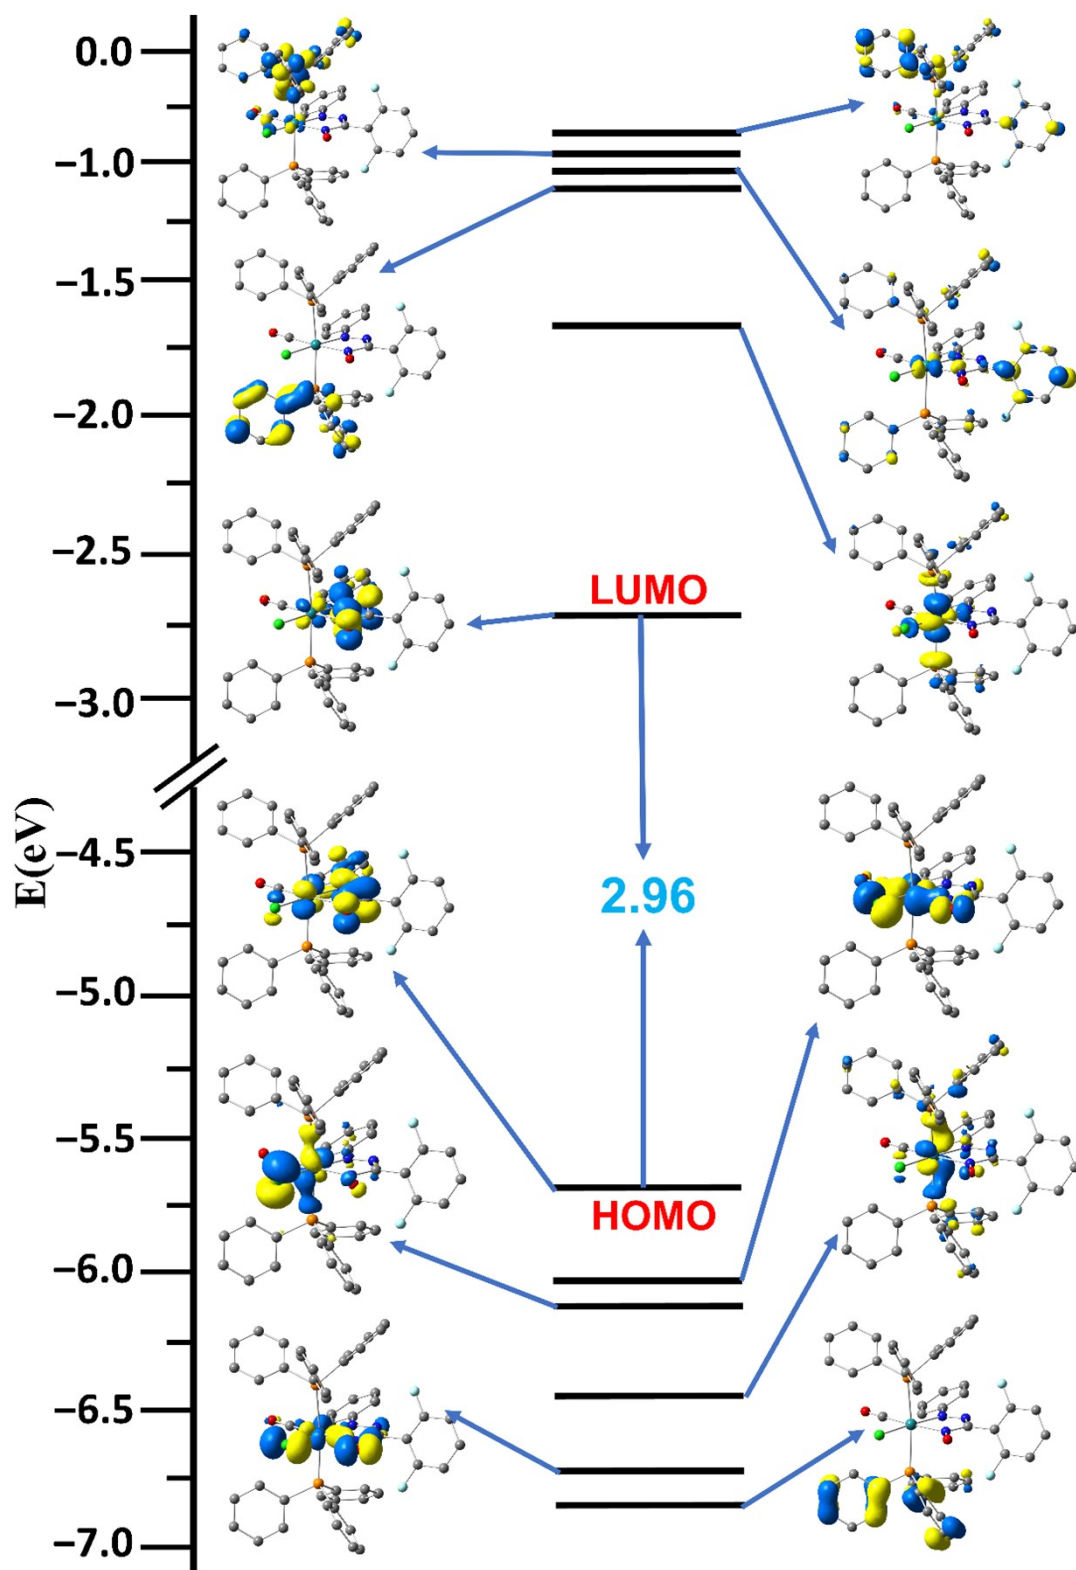

Figure S22: Partial MO diagram of 3a

**Table S21:** Coordinates of optimised geometry of **1a**

| <b>Tag</b> | <b>Symbol</b> | <b>X</b> | <b>Y</b> | <b>Z</b> |
|------------|---------------|----------|----------|----------|
| 1          | Ru            | 2.73207  | 8.442736 | 8.280366 |
| 2          | Cl            | 3.593433 | 10.78072 | 7.906925 |
| 3          | P             | 1.148992 | 9.43763  | 9.943558 |
| 4          | P             | 4.510473 | 7.719389 | 6.64821  |
| 5          | C             | 1.532679 | 8.684291 | 6.826334 |
| 6          | N             | 2.908002 | 5.9483   | 9.746109 |
| 7          | O             | 4.905643 | 8.698599 | 10.40762 |
| 8          | C             | 1.945629 | 9.911648 | 11.54835 |
| 9          | O             | 0.826555 | 8.817667 | 5.930992 |
| 10         | N             | 2.219521 | 6.486554 | 8.804211 |
| 11         | C             | 6.145994 | 8.593397 | 6.670395 |
| 12         | C             | 0.291819 | 11.02184 | 9.502611 |
| 13         | C             | -0.25416 | 8.328162 | 10.41267 |
| 14         | N             | 4.040375 | 7.952141 | 9.890313 |
| 15         | C             | 5.00197  | 5.944379 | 6.793739 |
| 16         | C             | -0.00666 | 7.138048 | 11.11389 |
| 17         | H             | 1.003047 | 6.872616 | 11.41324 |
| 18         | C             | 4.021213 | 7.955529 | 4.874942 |
| 19         | C             | 3.016558 | 10.81642 | 11.49454 |
| 20         | H             | 3.389256 | 11.15947 | 10.53394 |
| 21         | C             | 6.62407  | 9.227701 | 7.82117  |
| 22         | H             | 6.012559 | 9.278602 | 8.714963 |
| 23         | C             | 4.095037 | 4.92811  | 6.461694 |
| 24         | H             | 3.098013 | 5.172879 | 6.106658 |
| 25         | C             | 3.868259 | 6.683578 | 10.3457  |
| 26         | C             | 6.954705 | 8.561046 | 5.523839 |
| 27         | H             | 6.604449 | 8.078972 | 4.61543  |
| 28         | C             | 0.196856 | 11.48567 | 8.187964 |

|    |   |          |          |          |
|----|---|----------|----------|----------|
| 29 | H | 0.687907 | 10.95868 | 7.38099  |
| 30 | C | 4.458773 | 3.588159 | 6.574124 |
| 31 | H | 3.745572 | 2.814504 | 6.298973 |
| 32 | C | -1.05123 | 6.279947 | 11.44709 |
| 33 | H | -0.83959 | 5.36766  | 12.0005  |
| 34 | C | -0.50636 | 12.65561 | 7.896513 |
| 35 | H | -0.56485 | 13.00227 | 6.867152 |
| 36 | C | 6.268925 | 5.585179 | 7.274115 |
| 37 | H | 6.98984  | 6.349928 | 7.546449 |
| 38 | C | 7.892085 | 9.811515 | 7.825443 |
| 39 | H | 8.250494 | 10.30278 | 8.727748 |
| 40 | C | 6.624425 | 4.242916 | 7.401243 |
| 41 | H | 7.61235  | 3.984102 | 7.775973 |
| 42 | C | -0.32475 | 11.76113 | 10.52462 |
| 43 | H | -0.26075 | 11.42881 | 11.55726 |
| 44 | C | -2.3588  | 6.585199 | 11.06975 |
| 45 | H | -3.17389 | 5.913115 | 11.32883 |
| 46 | C | 8.691138 | 9.774996 | 6.685039 |
| 47 | H | 9.677219 | 10.23464 | 6.691361 |
| 48 | C | 3.36937  | 8.50413  | 2.199099 |
| 49 | H | 3.115557 | 8.715976 | 1.162776 |
| 50 | C | 8.217788 | 9.147871 | 5.532063 |
| 51 | H | 8.83116  | 9.115255 | 4.634111 |
| 52 | C | 3.605499 | 11.28177 | 12.66732 |
| 53 | H | 4.432609 | 11.98618 | 12.6082  |
| 54 | C | 1.485502 | 9.479878 | 12.79829 |
| 55 | H | 0.64617  | 8.79664  | 12.87538 |
| 56 | C | 4.066286 | 6.94288  | 3.910643 |
| 57 | H | 4.372559 | 5.936731 | 4.177305 |
| 58 | C | 3.736487 | 7.216597 | 2.581749 |



|    |   |          |          |          |
|----|---|----------|----------|----------|
| 59 | H | 3.775976 | 6.416576 | 1.845603 |
| 60 | C | 5.724788 | 3.240726 | 7.043778 |
| 61 | H | 6.006477 | 2.193907 | 7.133704 |
| 62 | C | 1.221032 | 5.604151 | 8.269754 |
| 63 | C | -1.02506 | 12.92844 | 10.23345 |
| 64 | H | -1.49562 | 13.48777 | 11.03911 |
| 65 | C | 3.145939 | 10.84305 | 13.90913 |
| 66 | H | 3.609674 | 11.20571 | 14.82406 |
| 67 | C | -1.11937 | 13.37908 | 8.916122 |
| 68 | H | -1.66433 | 14.29255 | 8.688347 |
| 69 | C | 3.655371 | 9.25152  | 4.47977  |
| 70 | H | 3.624974 | 10.0557  | 5.211707 |
| 71 | C | 4.639058 | 6.045859 | 11.43482 |
| 72 | C | 3.335244 | 9.52246  | 3.152733 |
| 73 | H | 3.055904 | 10.53338 | 2.863662 |
| 74 | C | -1.56991 | 8.621129 | 10.03054 |
| 75 | H | -1.79266 | 9.529627 | 9.4792   |
| 76 | C | 4.810077 | 4.649863 | 11.41789 |
| 77 | H | 4.397787 | 4.073001 | 10.59521 |
| 78 | C | -2.61303 | 7.753835 | 10.35578 |
| 79 | H | -3.62794 | 7.999624 | 10.0508  |
| 80 | C | 2.086615 | 9.940494 | 13.97064 |
| 81 | H | 1.714608 | 9.596112 | 14.93329 |
| 82 | C | 5.499719 | 4.001005 | 12.4371  |
| 83 | H | 5.623882 | 2.920704 | 12.39824 |
| 84 | C | 1.391288 | 4.211848 | 8.338031 |
| 85 | H | 2.292005 | 3.807098 | 8.783999 |
| 86 | C | -0.73715 | 3.875658 | 7.237568 |
| 87 | H | -1.49261 | 3.206724 | 6.831982 |
| 88 | C | 5.864038 | 6.113806 | 13.53259 |

|    |   |          |          |          |
|----|---|----------|----------|----------|
| 89 | H | 6.269091 | 6.692969 | 14.35996 |
| 90 | C | 5.180091 | 6.770386 | 12.51048 |
| 91 | H | 5.062251 | 7.846167 | 12.55058 |
| 92 | C | 0.05478  | 6.114864 | 7.695339 |
| 93 | H | -0.13016 | 7.17987  | 7.689004 |
| 94 | C | 6.031637 | 4.730338 | 13.50155 |
| 95 | H | 6.571932 | 4.224045 | 14.29862 |
| 96 | C | -0.91561 | 5.255922 | 7.183489 |
| 97 | H | -1.82056 | 5.675176 | 6.74965  |
| 98 | C | 0.42157  | 3.360495 | 7.822678 |
| 99 | H | 0.576683 | 2.284788 | 7.871908 |

**Table S22:** Coordinates of optimised geometry of **2a**

| Tag | Symbol | X        | Y        | Z        |
|-----|--------|----------|----------|----------|
| 1   | Ru     | 4.934585 | 14.22016 | 13.75228 |
| 2   | Cl     | 5.782196 | 15.87138 | 15.46867 |
| 3   | P      | 4.043372 | 12.90804 | 15.70453 |
| 4   | P      | 6.013005 | 15.56428 | 11.92507 |
| 5   | F      | 10.17352 | 7.80574  | 11.71093 |
| 6   | O      | 2.482443 | 16.00944 | 13.46206 |
| 7   | O      | 7.680209 | 13.03878 | 14.40713 |
| 8   | N      | 6.629841 | 12.92265 | 13.72635 |
| 9   | N      | 5.305402 | 11.80652 | 12.2028  |
| 10  | N      | 4.421682 | 12.71015 | 12.41646 |
| 11  | C      | 3.389762 | 15.31931 | 13.59031 |
| 12  | C      | 6.484199 | 11.8887  | 12.85983 |
| 13  | C      | 7.481785 | 10.83091 | 12.59816 |
| 14  | C      | 7.038452 | 9.582364 | 12.12501 |
| 15  | H      | 5.975497 | 9.40901  | 11.99081 |

|    |   |          |          |          |
|----|---|----------|----------|----------|
| 16 | C | 7.93484  | 8.562538 | 11.8259  |
| 17 | H | 7.590831 | 7.596343 | 11.46655 |
| 18 | C | 9.289228 | 8.800187 | 12.00024 |
| 19 | C | 9.771271 | 10.01366 | 12.45956 |
| 20 | H | 10.8407  | 10.16539 | 12.57913 |
| 21 | C | 8.86402  | 11.02709 | 12.76205 |
| 22 | H | 9.237106 | 11.97632 | 13.12442 |
| 23 | C | 3.226343 | 12.52093 | 11.64562 |
| 24 | C | 1.996539 | 12.98834 | 12.11816 |
| 25 | H | 1.929225 | 13.48217 | 13.07917 |
| 26 | C | 0.831794 | 12.77708 | 11.38346 |
| 27 | H | -0.11645 | 13.13908 | 11.77404 |
| 28 | C | 0.879128 | 12.10047 | 10.16641 |
| 29 | H | -0.02965 | 11.94129 | 9.590711 |
| 30 | C | 2.10572  | 11.62964 | 9.693977 |
| 31 | H | 2.158543 | 11.10602 | 8.741866 |
| 32 | C | 3.270667 | 11.83409 | 10.42324 |
| 33 | H | 4.22259  | 11.47928 | 10.0457  |
| 34 | C | 7.860019 | 15.73211 | 11.97986 |
| 35 | C | 8.602284 | 15.98209 | 10.81441 |
| 36 | H | 8.120881 | 15.99284 | 9.84127  |
| 37 | C | 9.972815 | 16.21713 | 10.88583 |
| 38 | H | 10.53316 | 16.40488 | 9.972395 |
| 39 | C | 10.62188 | 16.21515 | 12.12128 |
| 40 | H | 11.69243 | 16.40106 | 12.17592 |
| 41 | C | 9.890377 | 15.97734 | 13.28203 |
| 42 | H | 10.38652 | 15.97595 | 14.25036 |
| 43 | C | 8.517322 | 15.73606 | 13.21516 |
| 44 | H | 7.959679 | 15.55611 | 14.1265  |
| 45 | C | 5.516171 | 17.34594 | 11.73668 |

|    |   |          |          |          |
|----|---|----------|----------|----------|
| 46 | C | 5.737914 | 18.01857 | 10.52445 |
| 47 | H | 6.132567 | 17.48923 | 9.662396 |
| 48 | C | 5.448663 | 19.37494 | 10.40289 |
| 49 | H | 5.621798 | 19.87731 | 9.453614 |
| 50 | C | 4.941548 | 20.0854  | 11.49168 |
| 51 | H | 4.715651 | 21.14515 | 11.39557 |
| 52 | C | 4.732518 | 19.42973 | 12.70202 |
| 53 | H | 4.345913 | 19.97479 | 13.56047 |
| 54 | C | 5.018781 | 18.06927 | 12.82576 |
| 55 | H | 4.879501 | 17.58319 | 13.78508 |
| 56 | C | 5.668692 | 14.83898 | 10.26262 |
| 57 | C | 4.535338 | 15.22868 | 9.535171 |
| 58 | H | 3.863765 | 15.98753 | 9.928011 |
| 59 | C | 4.266094 | 14.66696 | 8.289088 |
| 60 | H | 3.389854 | 14.99239 | 7.732704 |
| 61 | C | 5.113926 | 13.69638 | 7.757967 |
| 62 | H | 4.906707 | 13.26366 | 6.781704 |
| 63 | C | 6.223745 | 13.27674 | 8.489211 |
| 64 | H | 6.886119 | 12.51174 | 8.089806 |
| 65 | C | 6.497413 | 13.83964 | 9.73469  |
| 66 | H | 7.373638 | 13.50466 | 10.28271 |
| 67 | C | 3.969937 | 11.08054 | 15.41056 |
| 68 | C | 3.04805  | 10.5352  | 14.50499 |
| 69 | H | 2.33911  | 11.17252 | 13.98686 |
| 70 | C | 3.015027 | 9.164408 | 14.26009 |
| 71 | H | 2.283101 | 8.762295 | 13.56292 |
| 72 | C | 3.914981 | 8.314506 | 14.9018  |
| 73 | H | 3.89096  | 7.244386 | 14.70811 |
| 74 | C | 4.845393 | 8.846427 | 15.7917  |
| 75 | H | 5.555082 | 8.194829 | 16.29684 |

|    |   |          |          |          |
|----|---|----------|----------|----------|
| 76 | C | 4.872192 | 10.21706 | 16.04769 |
| 77 | H | 5.59987  | 10.60541 | 16.75333 |
| 78 | C | 4.963917 | 13.01214 | 17.30864 |
| 79 | C | 6.356311 | 13.1553  | 17.3274  |
| 80 | H | 6.907355 | 13.28165 | 16.40139 |
| 81 | C | 7.046983 | 13.14095 | 18.53905 |
| 82 | H | 8.129269 | 13.25303 | 18.53893 |
| 83 | C | 6.35955  | 12.99274 | 19.7424  |
| 84 | H | 6.901372 | 12.98705 | 20.68583 |
| 85 | C | 4.972206 | 12.85312 | 19.73049 |
| 86 | H | 4.424531 | 12.73753 | 20.66335 |
| 87 | C | 4.277777 | 12.86109 | 18.52196 |
| 88 | H | 3.197664 | 12.74881 | 18.53535 |
| 89 | C | 2.339914 | 13.41518 | 16.21904 |
| 90 | C | 1.277735 | 12.52266 | 16.40104 |
| 91 | H | 1.408299 | 11.46154 | 16.21532 |
| 92 | C | 0.03635  | 12.98361 | 16.84304 |
| 93 | H | -0.77986 | 12.27701 | 16.97668 |
| 94 | C | -0.154   | 14.33505 | 17.12058 |
| 95 | H | -1.12138 | 14.69131 | 17.4676  |
| 96 | C | 0.905782 | 15.22863 | 16.95905 |
| 97 | H | 0.770628 | 16.28443 | 17.18317 |
| 98 | C | 2.141911 | 14.77403 | 16.5092  |
| 99 | H | 2.962635 | 15.47979 | 16.4009  |

**Table S23:** Coordinates of optimised geometry of **3a**

| <b>Tag</b> | <b>Symbol</b> | <b>X</b> | <b>Y</b> | <b>Z</b> |
|------------|---------------|----------|----------|----------|
| 1          | Ru            | 2.801451 | 8.405738 | 8.358971 |
| 2          | Cl            | 3.791517 | 10.69027 | 8.004597 |
| 3          | P             | 1.211477 | 9.463201 | 9.983424 |
| 4          | P             | 4.522016 | 7.655204 | 6.651279 |
| 5          | C             | 1.605024 | 8.686883 | 6.911    |
| 6          | N             | 2.900067 | 5.897672 | 9.826301 |
| 7          | O             | 4.960432 | 8.5812   | 10.5524  |
| 8          | C             | 1.936295 | 10.10549 | 11.56469 |
| 9          | O             | 0.897342 | 8.848198 | 6.022405 |
| 10         | N             | 2.227014 | 6.450918 | 8.879824 |
| 11         | C             | 6.201581 | 8.43308  | 6.712513 |
| 12         | C             | 0.267657 | 10.96047 | 9.422207 |
| 13         | C             | -0.11728 | 8.299404 | 10.52246 |
| 14         | N             | 4.083038 | 7.884675 | 9.991599 |
| 15         | C             | 4.909623 | 5.848491 | 6.610821 |
| 16         | C             | 0.195968 | 7.240582 | 11.38822 |
| 17         | H             | 1.201895 | 7.131968 | 11.78479 |
| 18         | C             | 4.008994 | 8.056764 | 4.911126 |
| 19         | C             | 3.090021 | 10.89858 | 11.49441 |
| 20         | H             | 3.590348 | 11.04608 | 10.54308 |
| 21         | C             | 6.741676 | 8.900422 | 7.914589 |
| 22         | H             | 6.153206 | 8.889508 | 8.824795 |
| 23         | C             | 3.896618 | 4.923046 | 6.321096 |
| 24         | H             | 2.880051 | 5.25776  | 6.136449 |
| 25         | C             | 3.862311 | 6.619775 | 10.42202 |
| 26         | C             | 6.980764 | 8.490974 | 5.547164 |
| 27         | H             | 6.583543 | 8.134369 | 4.601064 |
| 28         | C             | 0.417526 | 11.51495 | 8.148852 |

|    |   |          |          |          |
|----|---|----------|----------|----------|
| 29 | H | 1.12856  | 11.09603 | 7.449265 |
| 30 | C | 4.17886  | 3.561243 | 6.2469   |
| 31 | H | 3.381076 | 2.860848 | 6.010951 |
| 32 | C | -0.7806  | 6.323616 | 11.76788 |
| 33 | H | -0.52141 | 5.514318 | 12.44699 |
| 34 | C | -0.31056 | 12.64725 | 7.777136 |
| 35 | H | -0.17621 | 13.06622 | 6.782311 |
| 36 | C | 6.205212 | 5.373148 | 6.852614 |
| 37 | H | 7.00817  | 6.063587 | 7.089573 |
| 38 | C | 8.040092 | 9.410416 | 7.95046  |
| 39 | H | 8.445686 | 9.77372  | 8.892451 |
| 40 | C | 6.483087 | 4.008515 | 6.786904 |
| 41 | H | 7.495518 | 3.659179 | 6.977694 |
| 42 | C | -0.61487 | 11.57549 | 10.32583 |
| 43 | H | -0.7405  | 11.17746 | 11.32915 |
| 44 | C | -2.08287 | 6.44221  | 11.28171 |
| 45 | H | -2.84504 | 5.725754 | 11.58003 |
| 46 | C | 8.8093   | 9.465279 | 6.790146 |
| 47 | H | 9.819775 | 9.8673   | 6.820871 |
| 48 | C | 3.297071 | 8.817347 | 2.301948 |
| 49 | H | 3.020474 | 9.111315 | 1.291789 |
| 50 | C | 8.275318 | 9.003761 | 5.586803 |
| 51 | H | 8.86587  | 9.042738 | 4.673957 |
| 52 | C | 3.60006  | 11.50332 | 12.6415  |
| 53 | H | 4.497072 | 12.11496 | 12.56985 |
| 54 | C | 1.3079   | 9.931757 | 12.80516 |
| 55 | H | 0.408492 | 9.330647 | 12.89283 |
| 56 | C | 3.88469  | 7.098241 | 3.899798 |
| 57 | H | 4.077241 | 6.049982 | 4.102133 |
| 58 | C | 3.526402 | 7.477857 | 2.604582 |

|    |   |          |          |          |
|----|---|----------|----------|----------|
| 59 | H | 3.434086 | 6.717889 | 1.831595 |
| 60 | C | 5.474185 | 3.099333 | 6.477756 |
| 61 | H | 5.693728 | 2.035453 | 6.420304 |
| 62 | C | 1.219393 | 5.582292 | 8.340955 |
| 63 | C | -1.34181 | 12.70171 | 9.95377  |
| 64 | H | -2.02291 | 13.1614  | 10.66662 |
| 65 | C | 2.970874 | 11.32442 | 13.87274 |
| 66 | H | 3.371354 | 11.7975  | 14.7669  |
| 67 | C | -1.1938  | 13.24036 | 8.674217 |
| 68 | H | -1.75973 | 14.12287 | 8.384044 |
| 69 | C | 3.780174 | 9.40543  | 4.596372 |
| 70 | H | 3.877855 | 10.1669  | 5.366232 |
| 71 | C | 4.631578 | 6.00719  | 11.53102 |
| 72 | C | 3.430083 | 9.780841 | 3.302753 |
| 73 | H | 3.258935 | 10.83126 | 3.076876 |
| 74 | C | -1.42444 | 8.403432 | 10.03075 |
| 75 | H | -1.69359 | 9.20685  | 9.351308 |
| 76 | C | 5.509729 | 4.941576 | 11.3281  |
| 77 | C | -2.39983 | 7.481544 | 10.41004 |
| 78 | H | -3.41086 | 7.58096  | 10.02098 |
| 79 | C | 1.823729 | 10.53708 | 13.9504  |
| 80 | H | 1.321924 | 10.3917  | 14.90477 |
| 81 | C | 6.236328 | 4.343459 | 12.34513 |
| 82 | H | 6.904452 | 3.518572 | 12.116   |
| 83 | C | 1.357819 | 4.187158 | 8.436664 |
| 84 | C | -0.75048 | 3.878007 | 7.290582 |
| 85 | H | -1.51044 | 3.218383 | 6.878176 |
| 86 | C | 5.223516 | 5.890379 | 13.90613 |
| 87 | H | 5.085803 | 6.279854 | 14.91045 |
| 88 | C | 4.518975 | 6.445576 | 12.85147 |



|    |   |          |          |          |
|----|---|----------|----------|----------|
| 89 | C | 0.081082 | 6.10736  | 7.725862 |
| 90 | C | 6.088835 | 4.830524 | 13.64162 |
| 91 | H | 6.6504   | 4.377963 | 14.4543  |
| 92 | C | -0.89542 | 5.260137 | 7.205054 |
| 93 | H | -1.77843 | 5.691098 | 6.738729 |
| 94 | C | 0.381842 | 3.348434 | 7.91405  |
| 95 | H | 0.512127 | 2.270707 | 7.985484 |
| 96 | H | 2.2409   | 3.770965 | 8.907413 |
| 97 | H | -0.07789 | 7.175494 | 7.687888 |
| 98 | F | 5.666149 | 4.473598 | 10.06751 |
| 99 | F | 3.653462 | 7.452057 | 13.11447 |

**Table S24:** Coordinates of optimised geometry of [3a]<sup>-</sup>

| Tag | Symbol | XX       | YY       | ZZ       |
|-----|--------|----------|----------|----------|
| 1   | Ru     | 2.792605 | 8.49803  | 8.288729 |
| 2   | Cl     | 3.788218 | 10.82054 | 7.913481 |
| 3   | P      | 1.206994 | 9.445231 | 9.936822 |
| 4   | P      | 4.467677 | 7.646867 | 6.617634 |
| 5   | C      | 1.578423 | 8.838112 | 6.888037 |
| 6   | N      | 3.00194  | 5.993873 | 9.8632   |
| 7   | O      | 5.049619 | 8.774333 | 10.44471 |
| 8   | C      | 1.919521 | 9.908409 | 11.58659 |
| 9   | O      | 0.854342 | 9.094783 | 6.024535 |
| 10  | N      | 2.249065 | 6.502963 | 8.867735 |
| 11  | C      | 6.178445 | 8.367245 | 6.617679 |
| 12  | C      | 0.334792 | 11.04083 | 9.530459 |
| 13  | C      | -0.20933 | 8.324939 | 10.33531 |
| 14  | N      | 4.144241 | 8.032669 | 9.887643 |
| 15  | C      | 4.80475  | 5.827672 | 6.651146 |
| 16  | C      | 0.011328 | 7.167851 | 11.09523 |

|    |   |          |          |          |
|----|---|----------|----------|----------|
| 17 | H | 1.005237 | 6.93558  | 11.46603 |
| 18 | C | 3.970917 | 7.98683  | 4.857319 |
| 19 | C | 3.063662 | 10.71865 | 11.58149 |
| 20 | H | 3.550479 | 10.95904 | 10.64157 |
| 21 | C | 6.731402 | 8.893697 | 7.789349 |
| 22 | H | 6.147193 | 8.936714 | 8.70472  |
| 23 | C | 3.769742 | 4.923125 | 6.374911 |
| 24 | H | 2.772482 | 5.283676 | 6.1408   |
| 25 | C | 3.941091 | 6.772653 | 10.36348 |
| 26 | C | 6.956345 | 8.339651 | 5.449742 |
| 27 | H | 6.548287 | 7.937431 | 4.526381 |
| 28 | C | 0.448923 | 11.66099 | 8.283822 |
| 29 | H | 1.096608 | 11.24332 | 7.524584 |
| 30 | C | 4.000455 | 3.549802 | 6.399913 |
| 31 | H | 3.185707 | 2.865218 | 6.174745 |
| 32 | C | -1.03774 | 6.297154 | 11.38014 |
| 33 | H | -0.84864 | 5.408097 | 11.97814 |
| 34 | C | -0.23398 | 12.84977 | 8.014573 |
| 35 | H | -0.12714 | 13.31847 | 7.038431 |
| 36 | C | 6.068009 | 5.320784 | 6.982303 |
| 37 | H | 6.884383 | 5.996414 | 7.216193 |
| 38 | C | 8.04147  | 9.378003 | 7.789632 |
| 39 | H | 8.459001 | 9.786504 | 8.708187 |
| 40 | C | 6.29417  | 3.944779 | 7.020481 |
| 41 | H | 7.282189 | 3.571343 | 7.282375 |
| 42 | C | -0.47076 | 11.64623 | 10.50914 |
| 43 | H | -0.57072 | 11.1935  | 11.49228 |
| 44 | C | -2.31916 | 6.55442  | 10.8931  |
| 45 | H | -3.13668 | 5.871276 | 11.11432 |
| 46 | C | 8.808799 | 9.349035 | 6.627287 |

|    |   |          |          |          |
|----|---|----------|----------|----------|
| 47 | H | 9.827551 | 9.731825 | 6.631907 |
| 48 | C | 3.285652 | 8.681912 | 2.220022 |
| 49 | H | 3.019074 | 8.950338 | 1.19988  |
| 50 | C | 8.261457 | 8.82684  | 5.454425 |
| 51 | H | 8.849824 | 8.799062 | 4.539334 |
| 52 | C | 3.58558  | 11.20834 | 12.77695 |
| 53 | H | 4.473587 | 11.83715 | 12.7562  |
| 54 | C | 1.32018  | 9.590099 | 12.81179 |
| 55 | H | 0.428851 | 8.971354 | 12.84694 |
| 56 | C | 3.863631 | 7.005263 | 3.866334 |
| 57 | H | 4.057986 | 5.962847 | 4.097744 |
| 58 | C | 3.518261 | 7.351151 | 2.557812 |
| 59 | H | 3.438266 | 6.572339 | 1.80202  |
| 60 | C | 5.264043 | 3.055046 | 6.722748 |
| 61 | H | 5.442039 | 1.981892 | 6.747052 |
| 62 | C | 1.277238 | 5.608911 | 8.4156   |
| 63 | C | -1.15256 | 12.82938 | 10.24099 |
| 64 | H | -1.77297 | 13.28014 | 11.01294 |
| 65 | C | 2.985219 | 10.88547 | 13.99374 |
| 66 | H | 3.397698 | 11.26546 | 14.92635 |
| 67 | C | -1.03783 | 13.43538 | 8.988225 |
| 68 | H | -1.56837 | 14.36172 | 8.777779 |
| 69 | C | 3.736173 | 9.32558  | 4.506626 |
| 70 | H | 3.817356 | 10.10463 | 5.261729 |
| 71 | C | 4.758078 | 6.234503 | 11.48509 |
| 72 | C | 3.400691 | 9.669181 | 3.200035 |
| 73 | H | 3.224387 | 10.71295 | 2.947599 |
| 74 | C | -1.49605 | 8.567275 | 9.837152 |
| 75 | H | -1.69371 | 9.447038 | 9.231568 |
| 76 | C | 6.129947 | 5.997467 | 11.37522 |

|    |   |          |          |          |
|----|---|----------|----------|----------|
| 77 | C | -2.54287 | 7.687577 | 10.11377 |
| 78 | H | -3.5356  | 7.893849 | 9.718662 |
| 79 | C | 1.853501 | 10.07198 | 14.00781 |
| 80 | H | 1.375967 | 9.812985 | 14.95079 |
| 81 | C | 6.911497 | 5.489295 | 12.40036 |
| 82 | H | 7.973202 | 5.327816 | 12.23687 |
| 83 | C | 1.199242 | 4.275708 | 8.900686 |
| 84 | C | -0.6903  | 3.768944 | 7.458162 |
| 85 | H | -1.43747 | 3.068557 | 7.091002 |
| 86 | C | 4.937106 | 5.398917 | 13.78868 |
| 87 | H | 4.436783 | 5.177098 | 14.72699 |
| 88 | C | 4.208591 | 5.916038 | 12.72788 |
| 89 | C | 0.321653 | 5.977148 | 7.445664 |
| 90 | C | 6.302719 | 5.187901 | 13.61727 |
| 91 | H | 6.895412 | 4.785461 | 14.43445 |
| 92 | C | -0.63372 | 5.07846  | 6.978983 |
| 93 | H | -1.34928 | 5.416767 | 6.230323 |
| 94 | C | 0.240926 | 3.387913 | 8.429033 |
| 95 | H | 0.224648 | 2.37372  | 8.827854 |
| 96 | H | 1.91113  | 3.950688 | 9.649454 |
| 97 | H | 0.309285 | 6.984838 | 7.059111 |
| 98 | F | 6.733617 | 6.252062 | 10.18898 |
| 99 | F | 2.882073 | 6.136188 | 12.92792 |

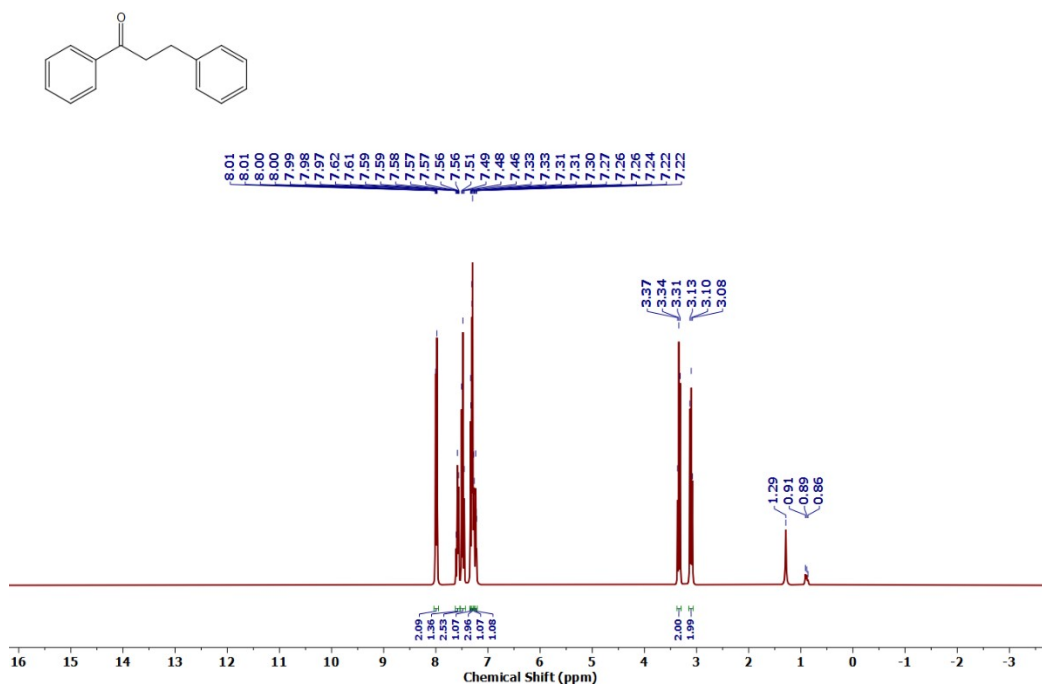

Figure S23: <sup>1</sup>H NMR spectrum of 7a

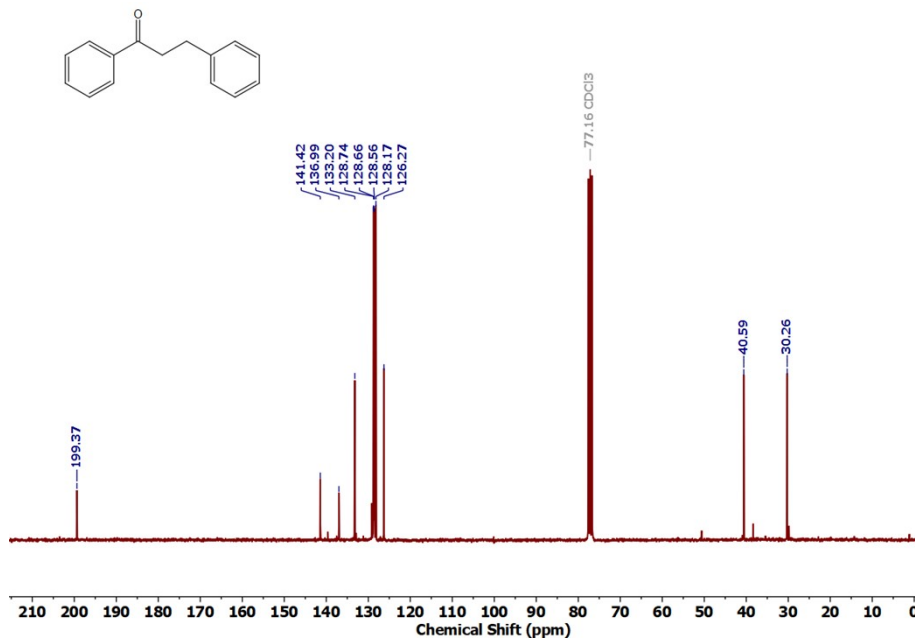

Figure S24: <sup>13</sup>C NMR spectrum of 7a

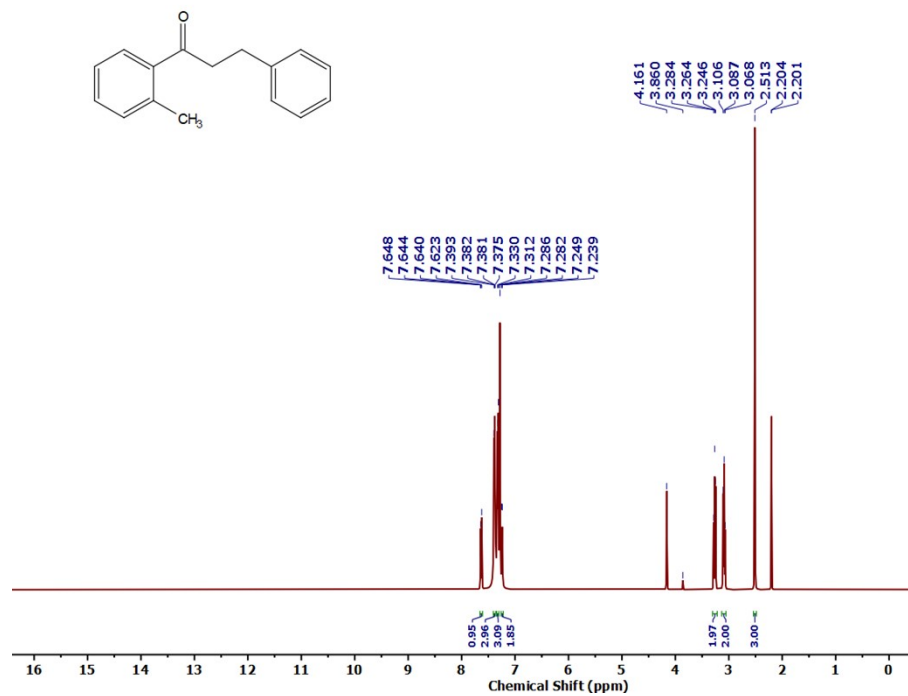

Figure S25: <sup>1</sup>H NMR spectrum of 7b

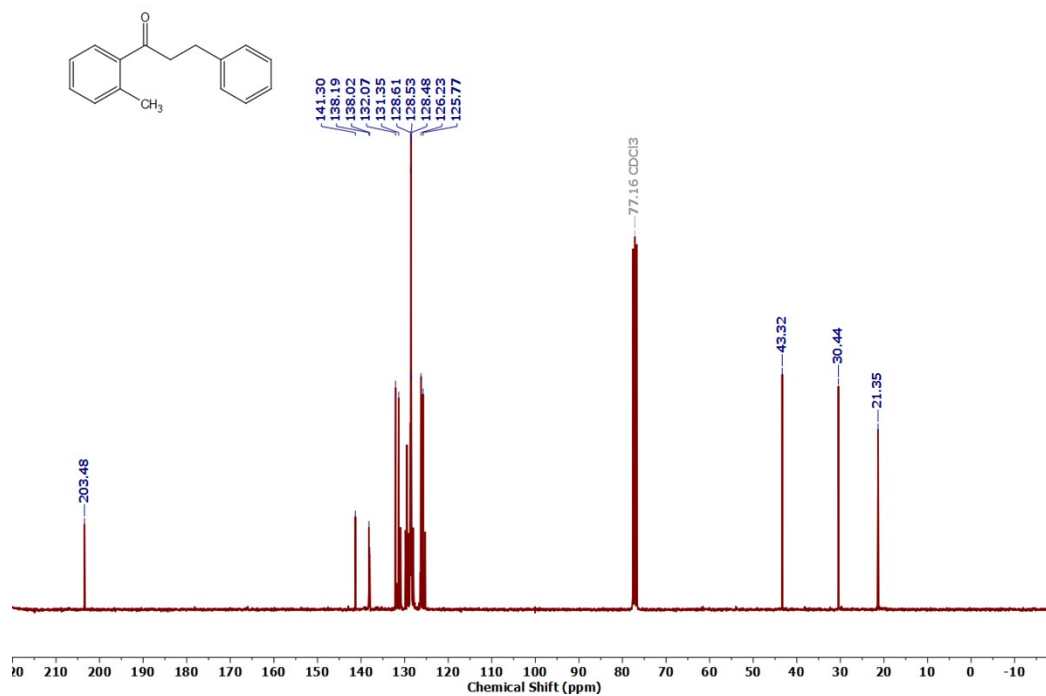

Figure S26: <sup>13</sup>C NMR spectrum of 7b

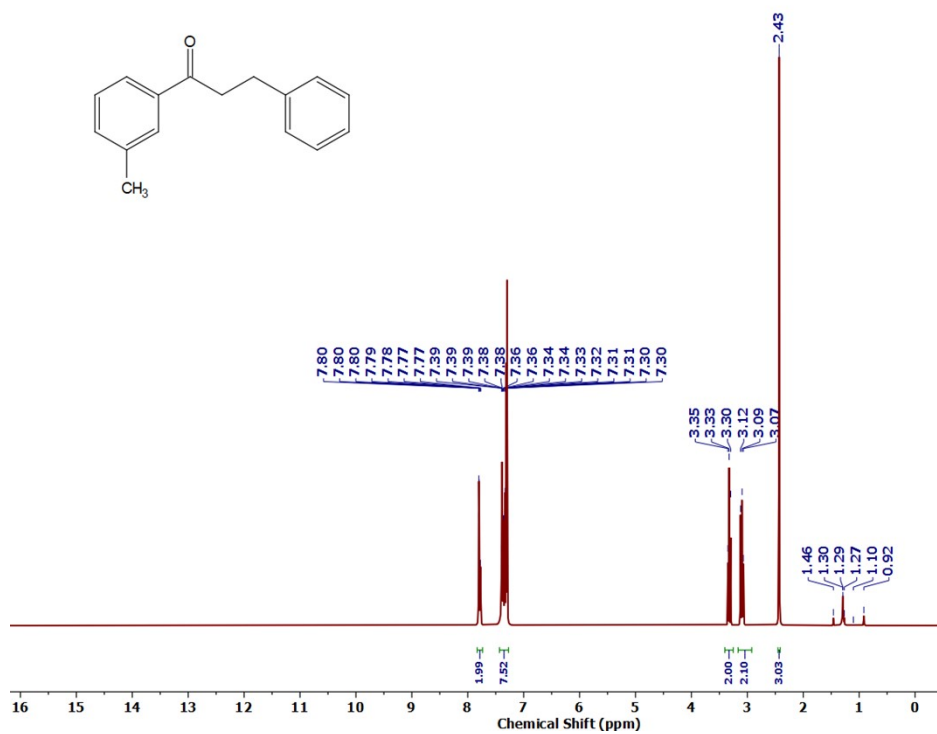

Figure S27: <sup>1</sup>H NMR spectrum of 7c

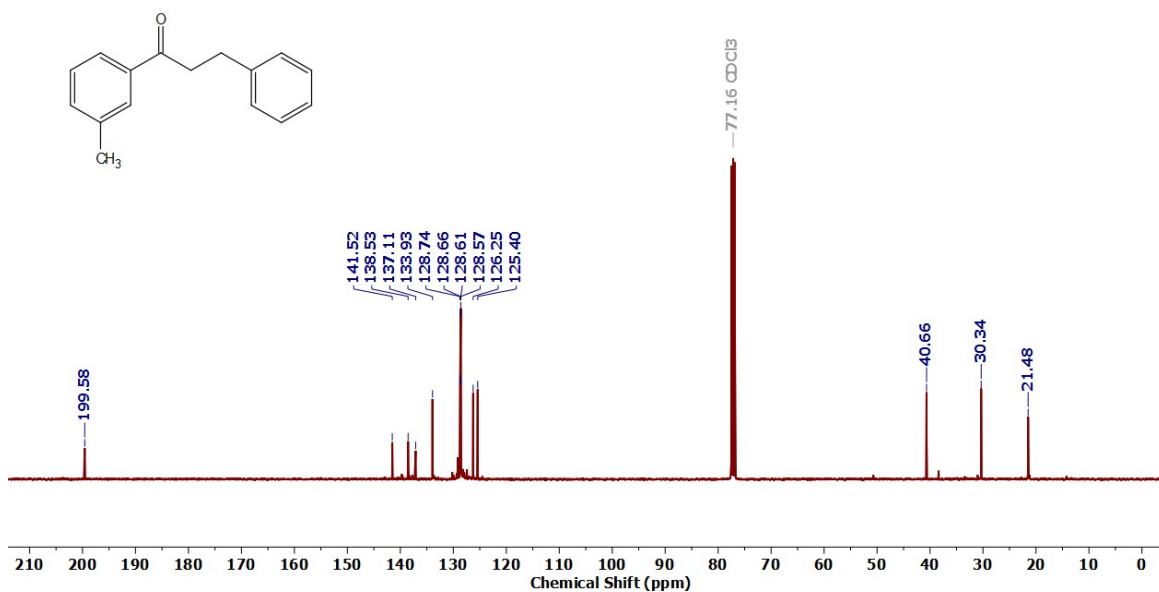

Figure S28: <sup>13</sup>C NMR spectrum of 7c

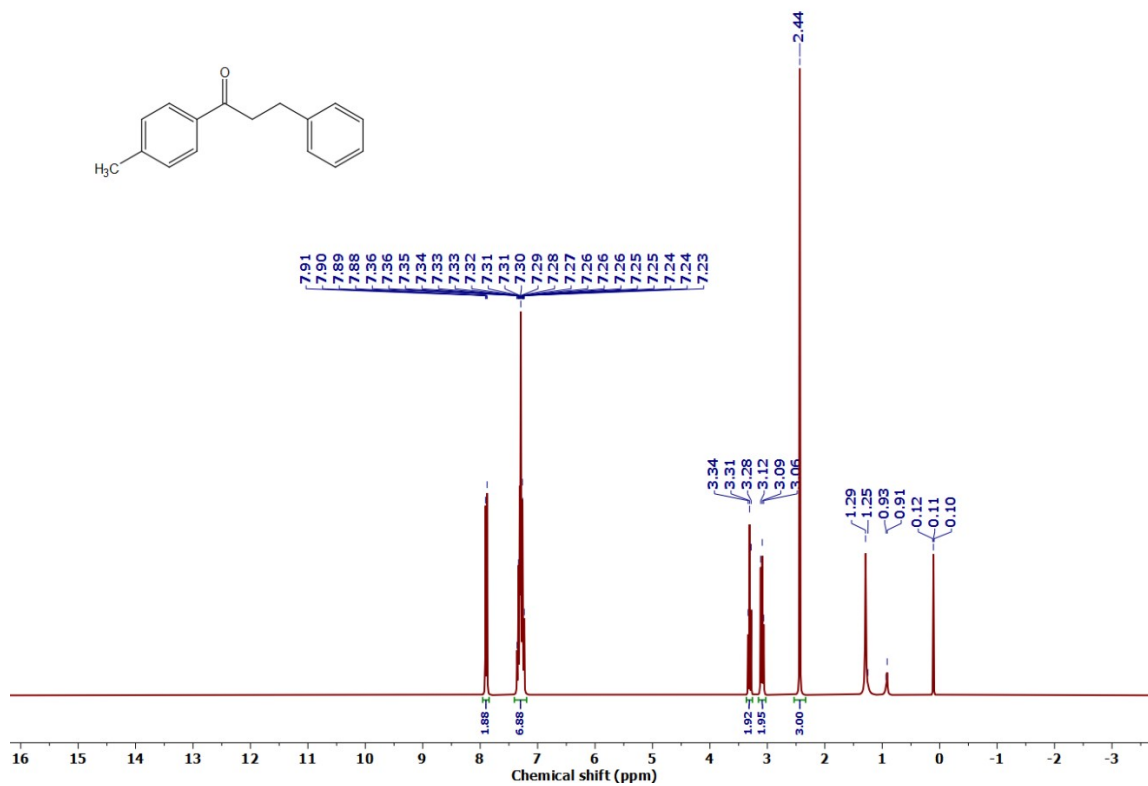

Figure S29: <sup>1</sup>H NMR spectrum of 7d

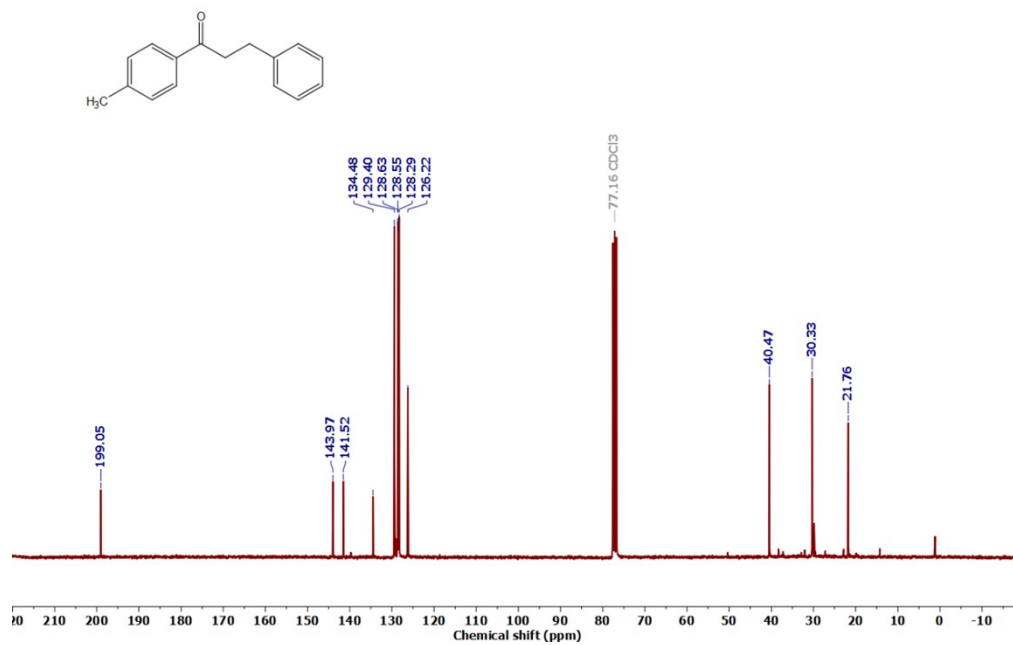

Figure S30: <sup>13</sup>C NMR spectrum of 7d



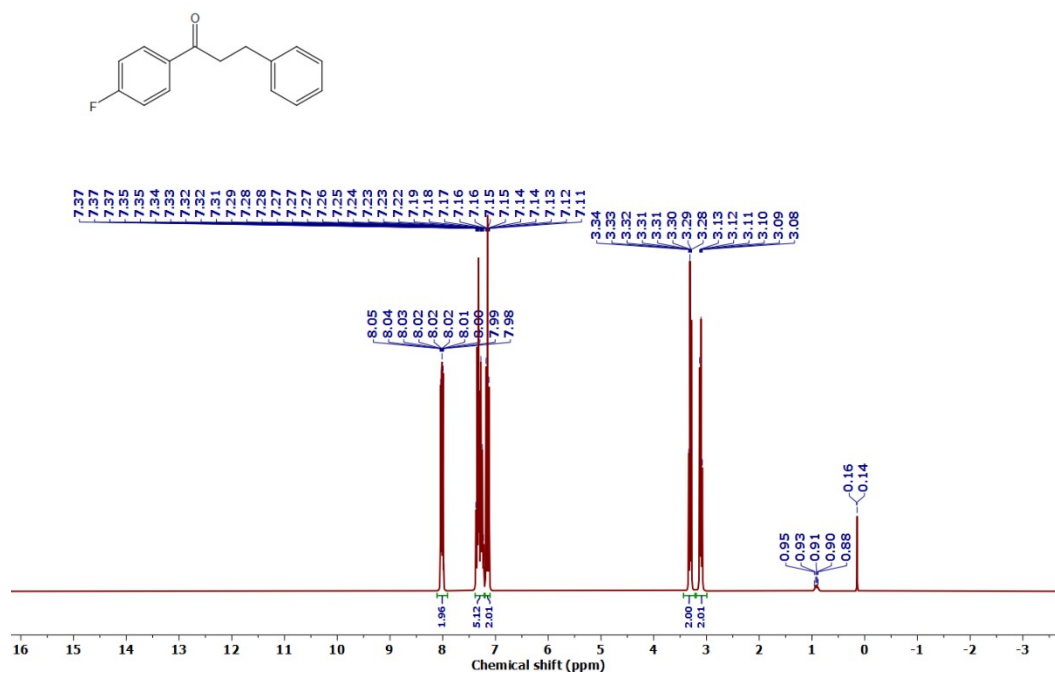

Figure S31: <sup>1</sup>H NMR spectrum of 7e

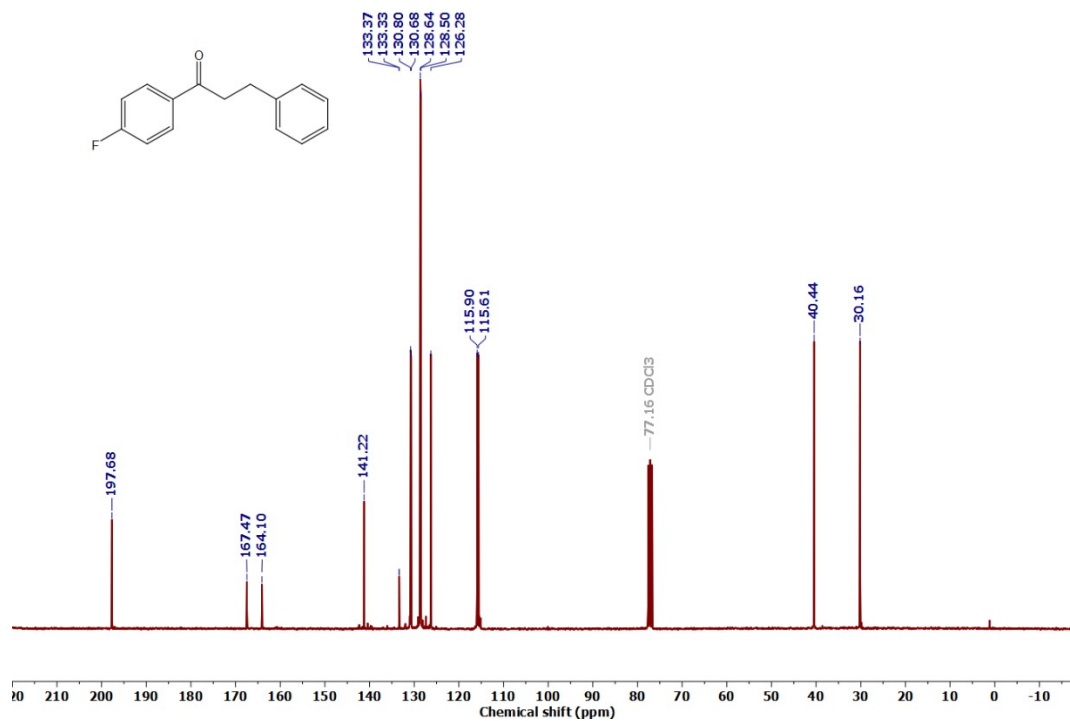

Figure S32: <sup>13</sup>C NMR spectrum of 7e

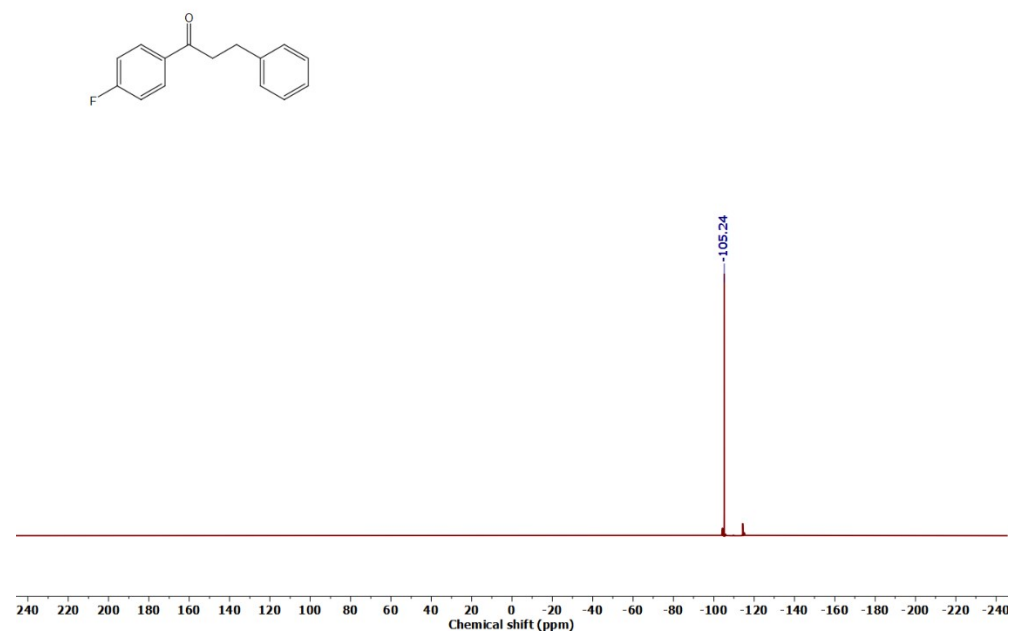

Figure S33: <sup>19</sup>F NMR spectrum of 7e

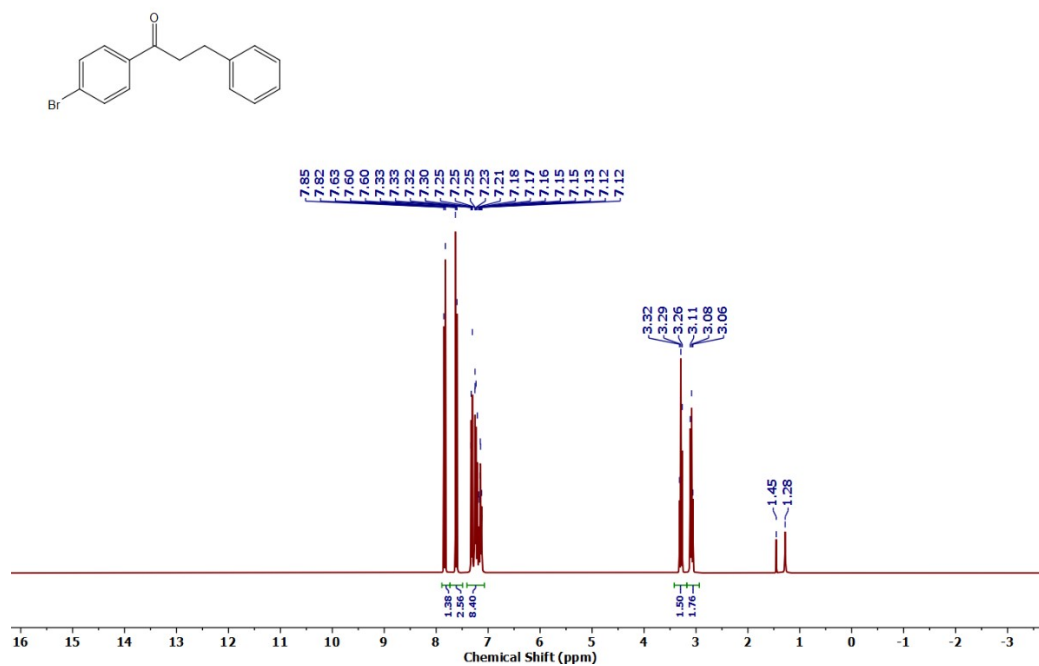

Figure S34: <sup>1</sup>H NMR spectrum of 7f

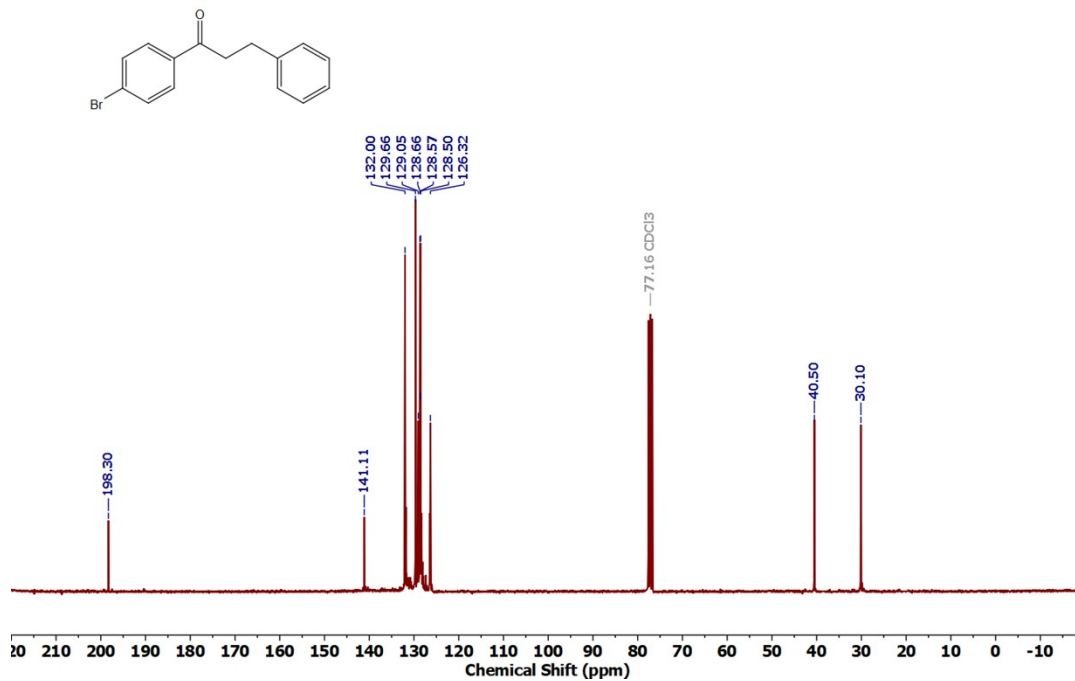

Figure S35: <sup>13</sup>C NMR spectrum of 7f

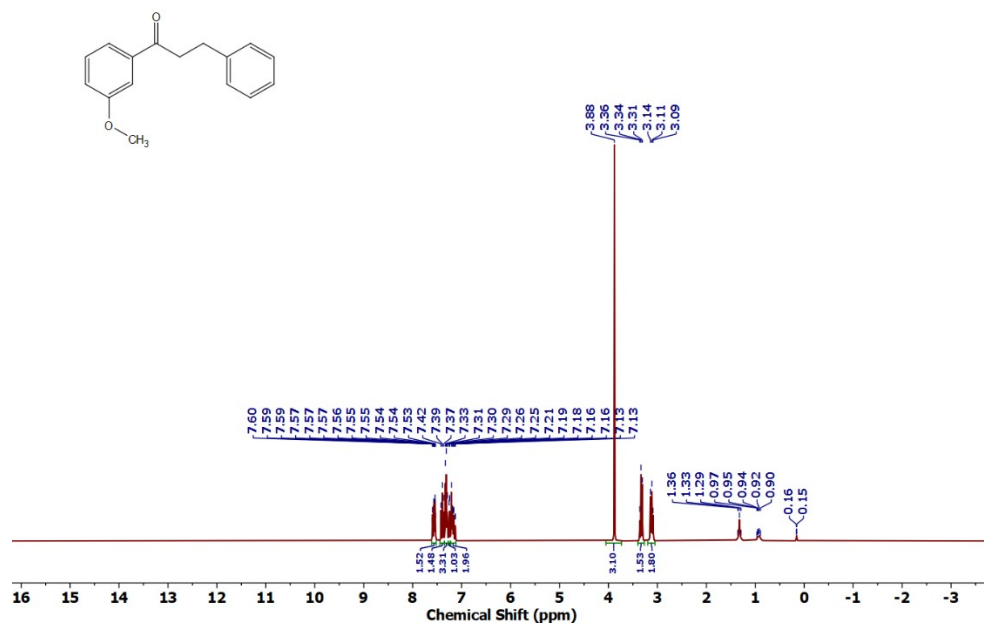

Figure S36: <sup>1</sup>H NMR spectrum of 7g

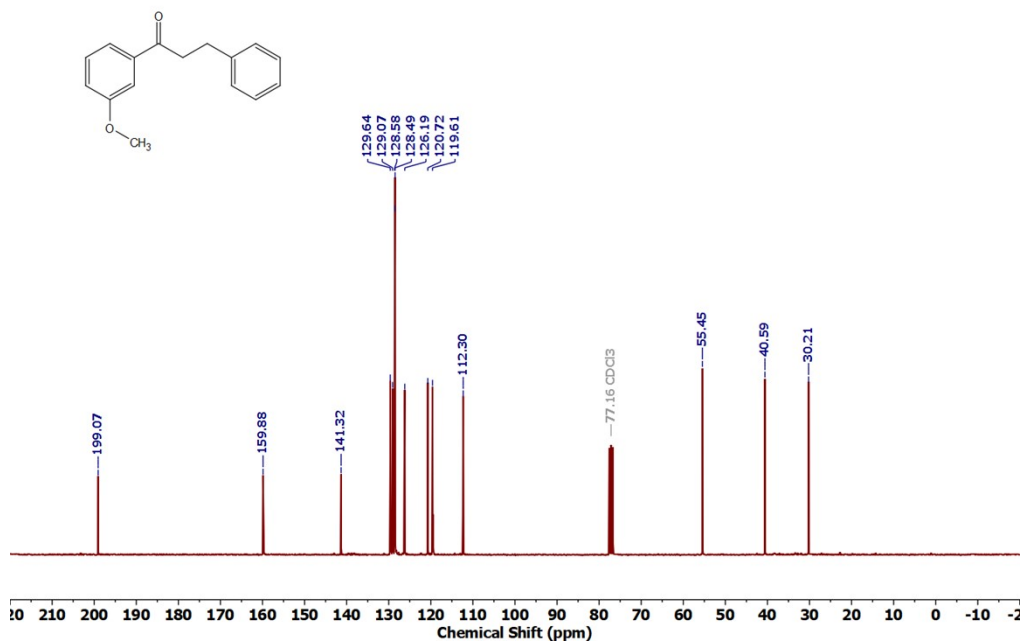

**Figure S37: <sup>13</sup>C NMR spectrum of 7g**

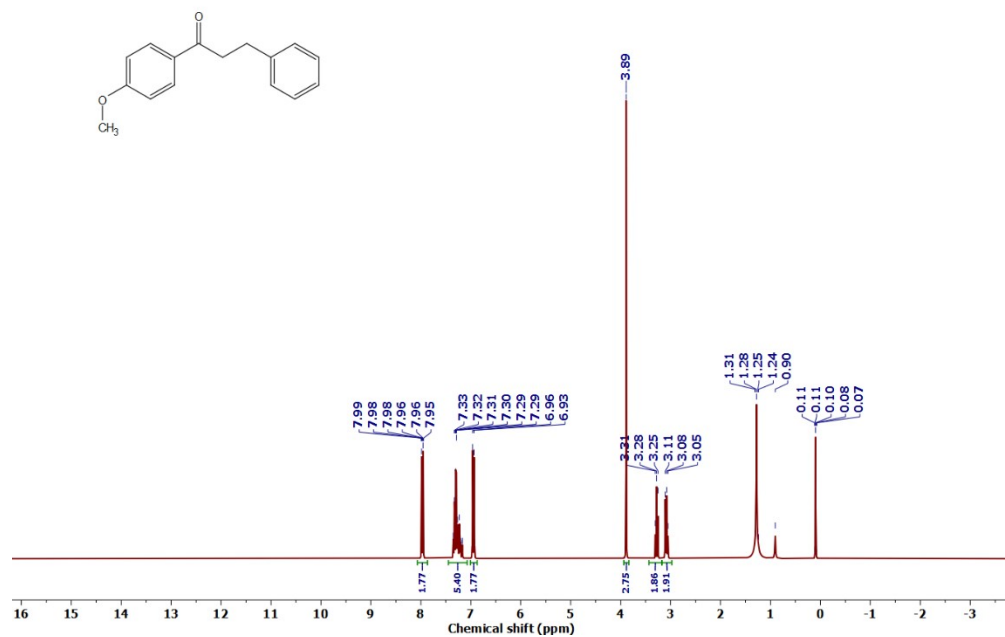

**Figure S38: <sup>1</sup>H NMR spectrum of 7h**

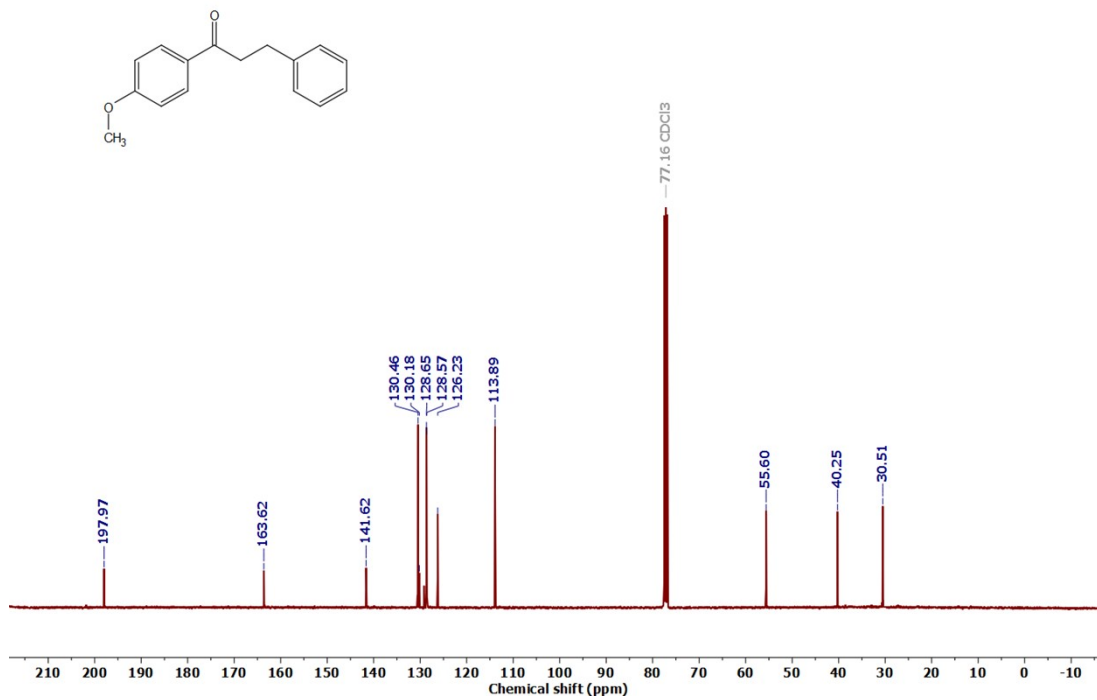

Figure S39: <sup>13</sup>C NMR spectrum of 7h

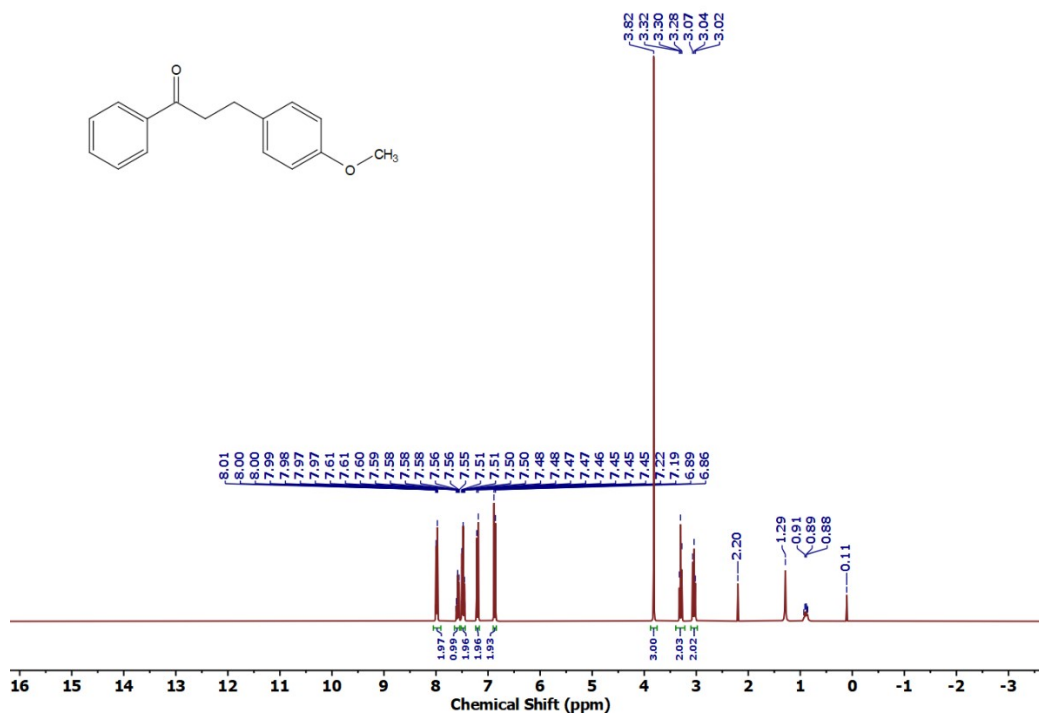

Figure S40: <sup>1</sup>H NMR spectrum of 7i

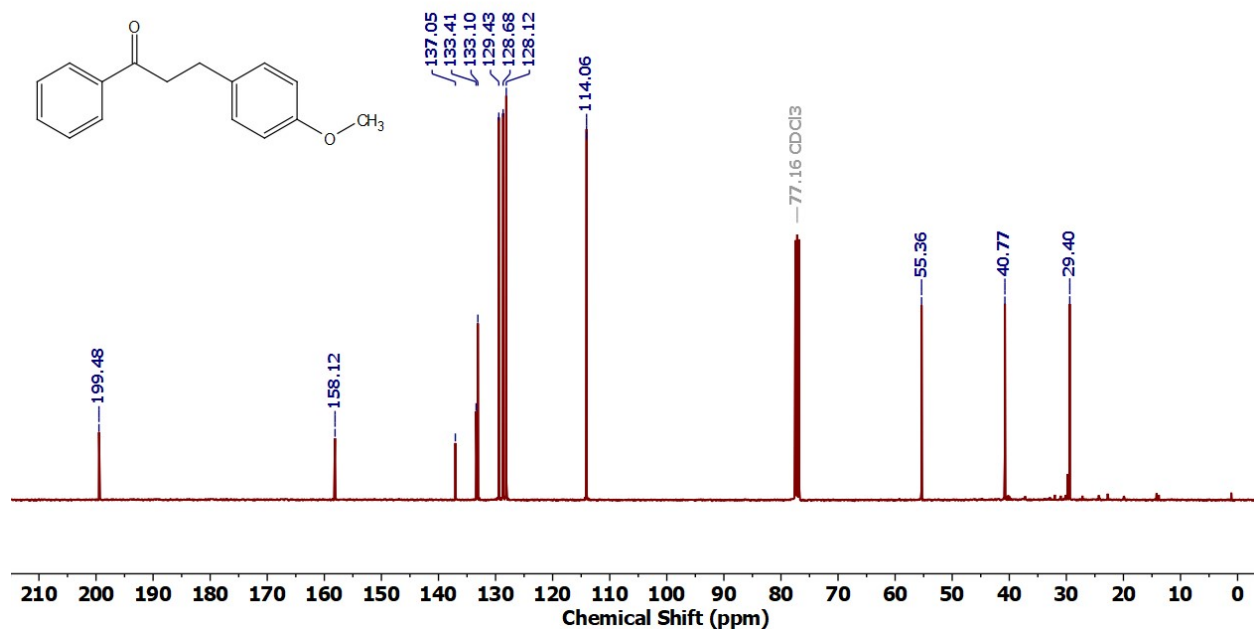

Figure S41: <sup>13</sup>C NMR spectrum of 7i

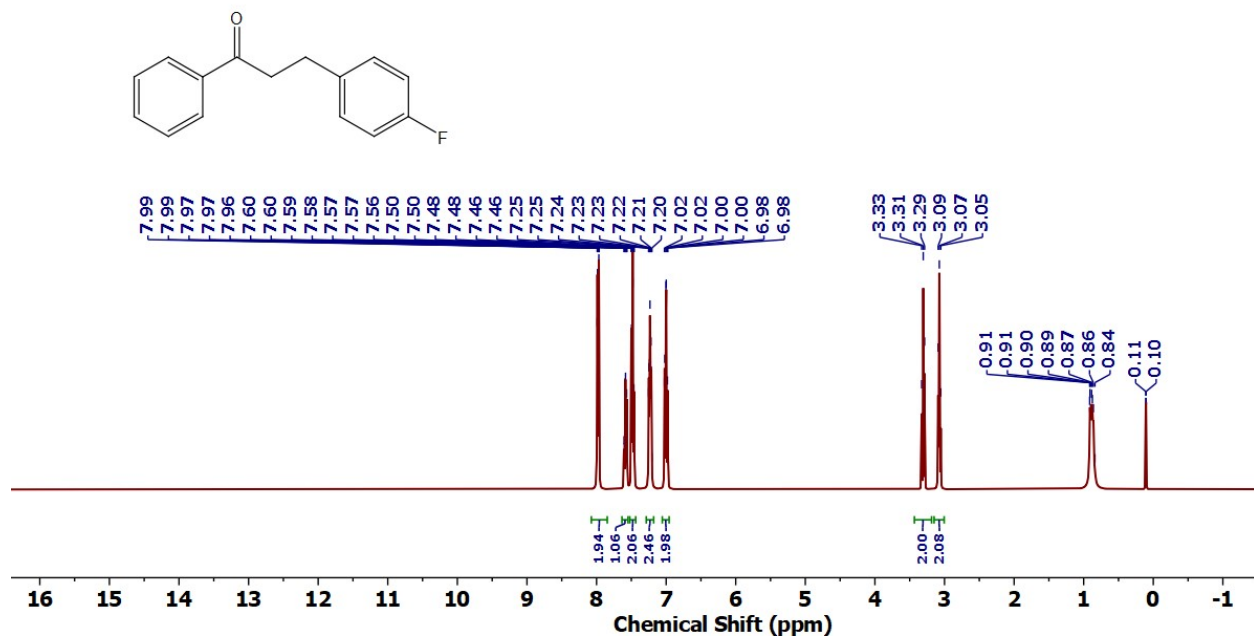

Figure S42: <sup>1</sup>H NMR spectrum of 7j

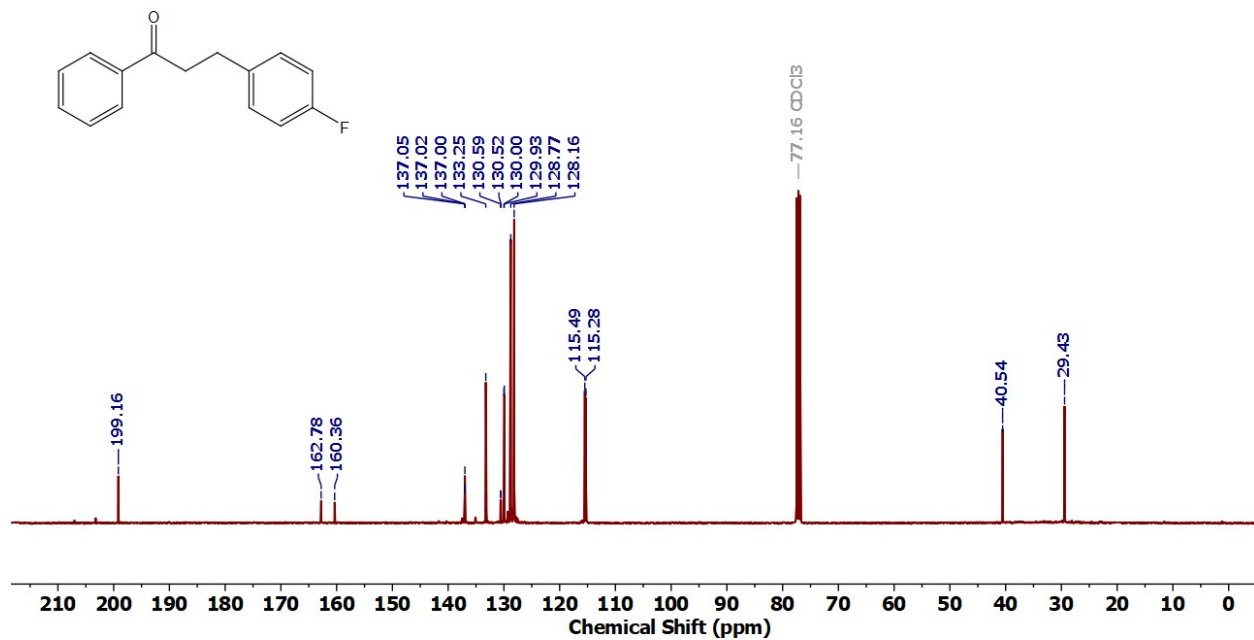

Figure S43: <sup>13</sup>C NMR spectrum of 7j

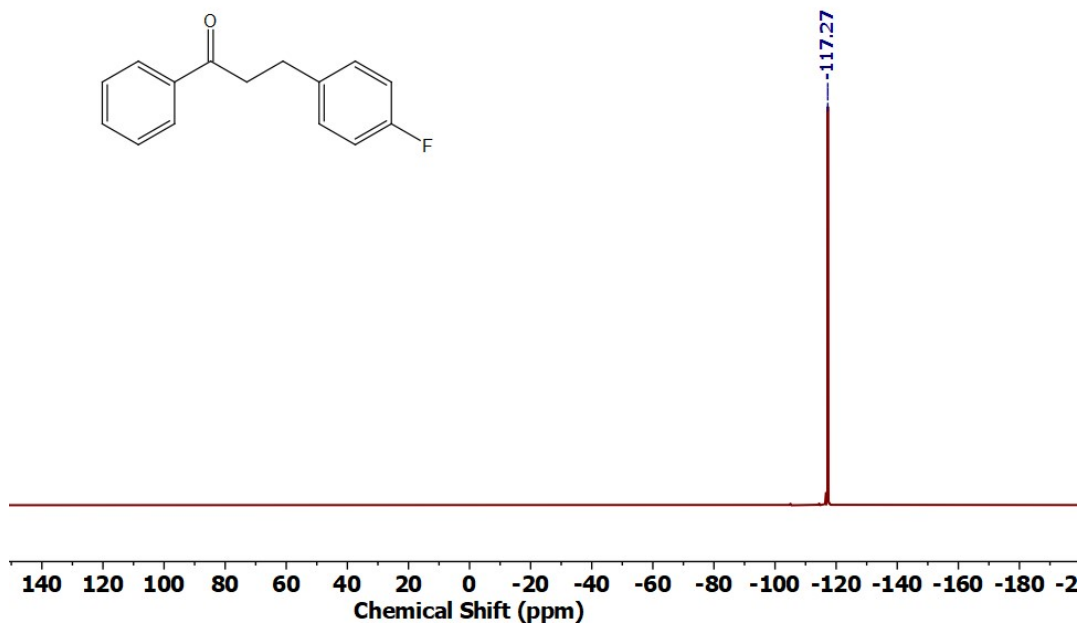

Figure S44: <sup>19</sup>F NMR spectrum of 7j

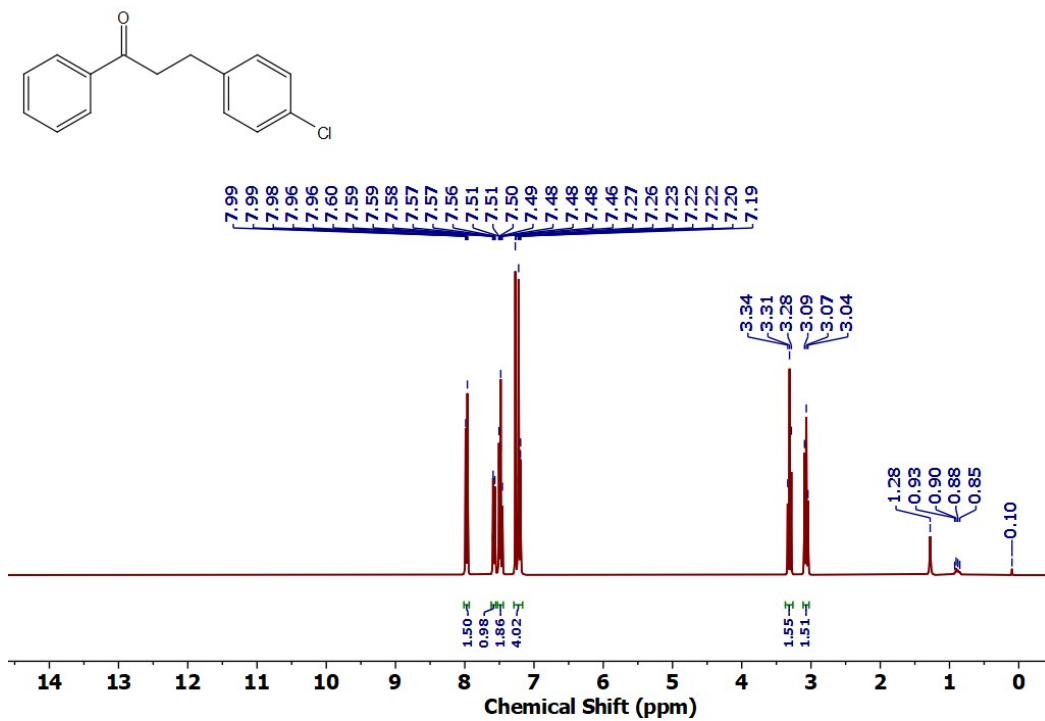

Figure S45: <sup>1</sup>H NMR spectrum of 7k

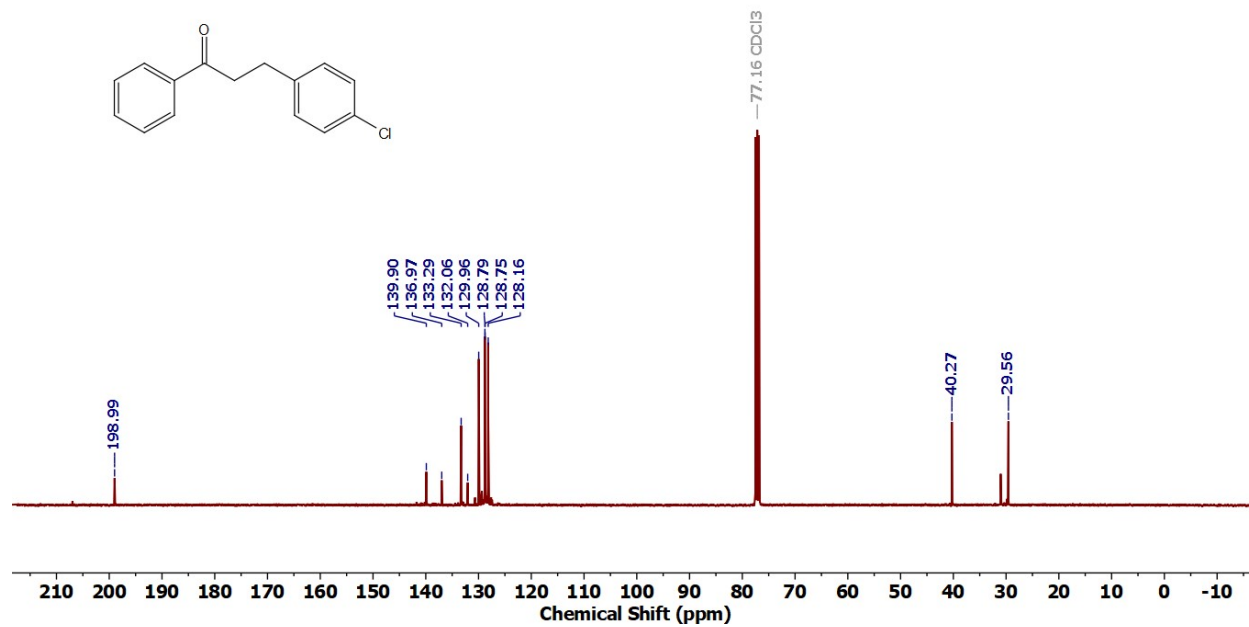

Figure S46: <sup>13</sup>C NMR spectrum of 7k



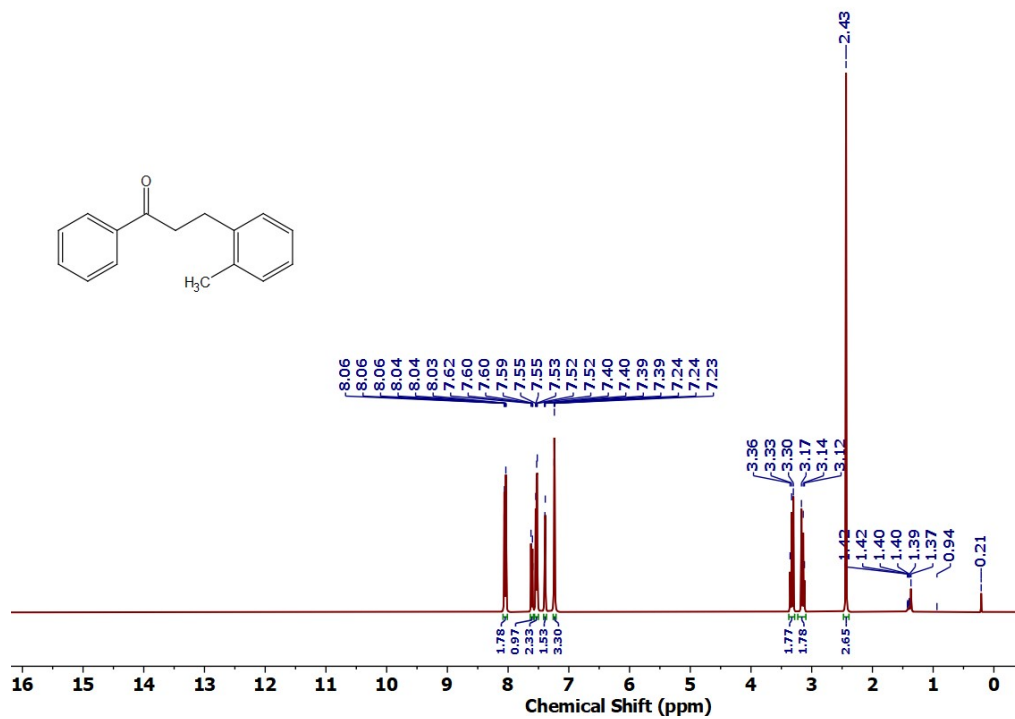

Figure S47: <sup>1</sup>H NMR spectrum of 7I

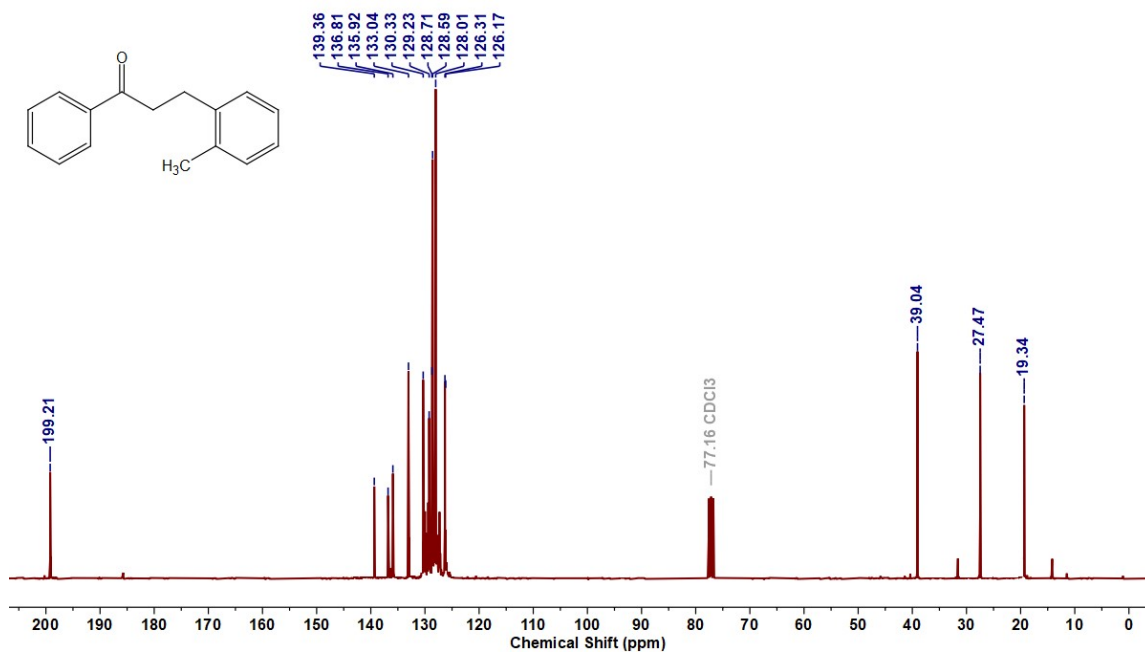

Figure S48: <sup>13</sup>C NMR spectrum of 7I

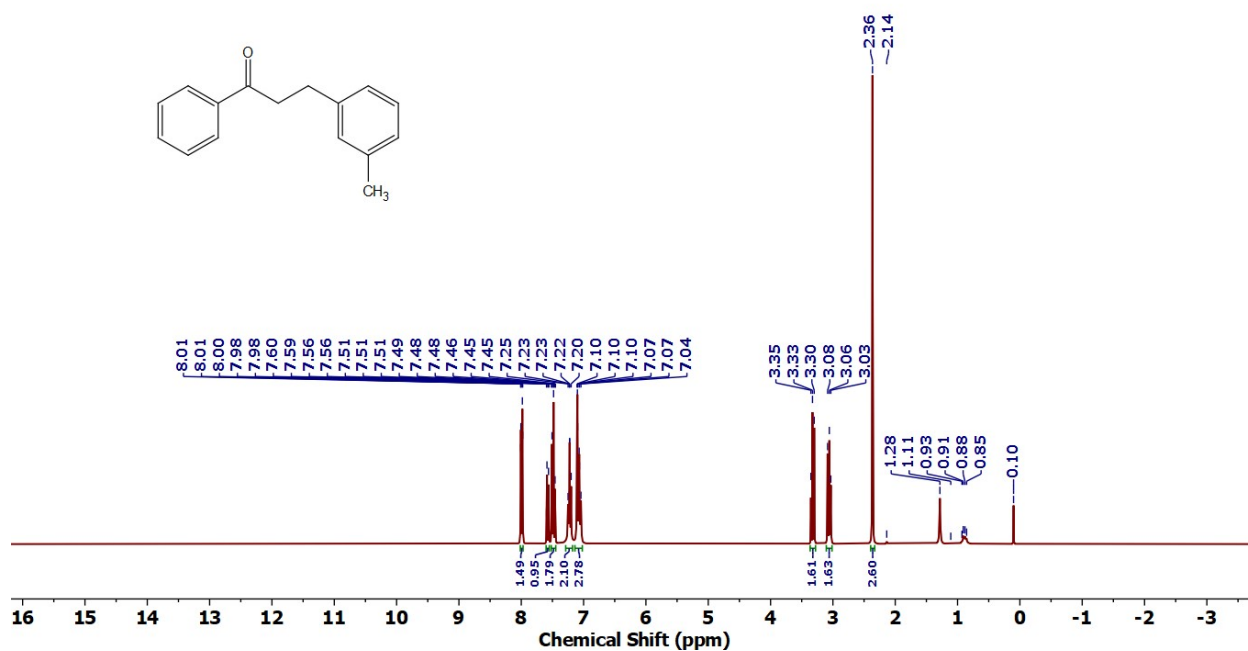

Figure S49: <sup>1</sup>H NMR spectrum of 7m

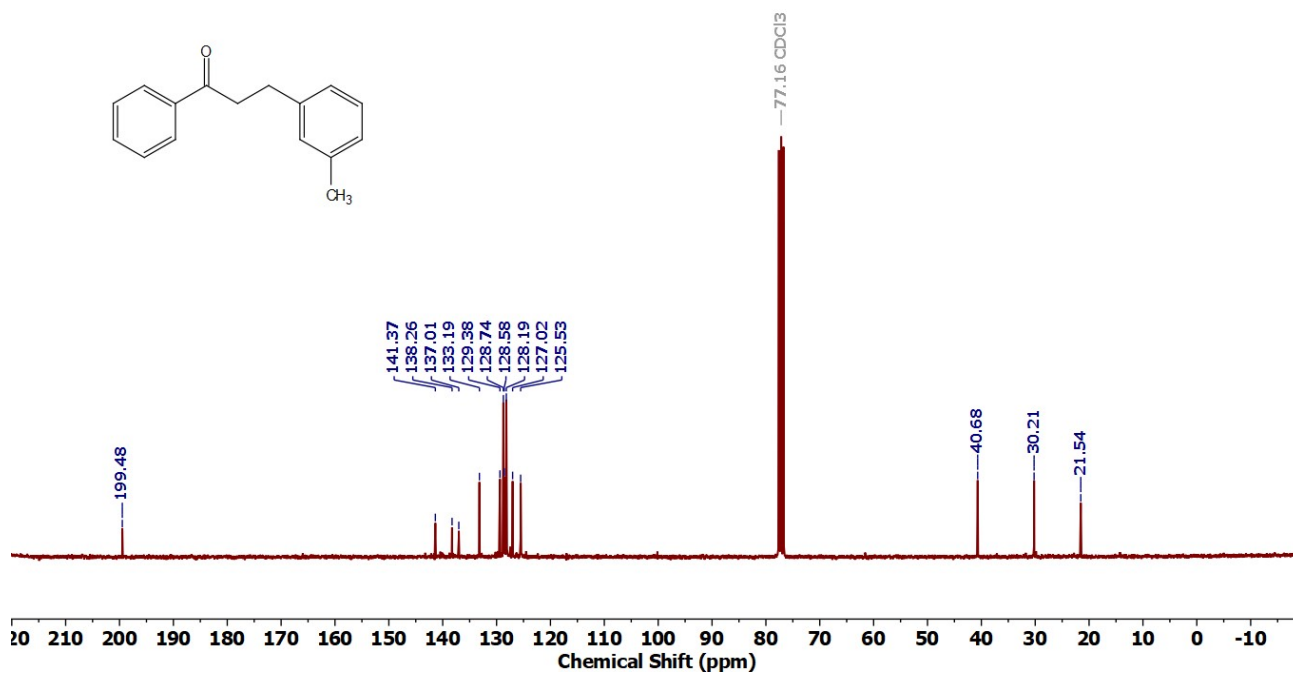

Figure S50: <sup>13</sup>C NMR spectrum of 7m

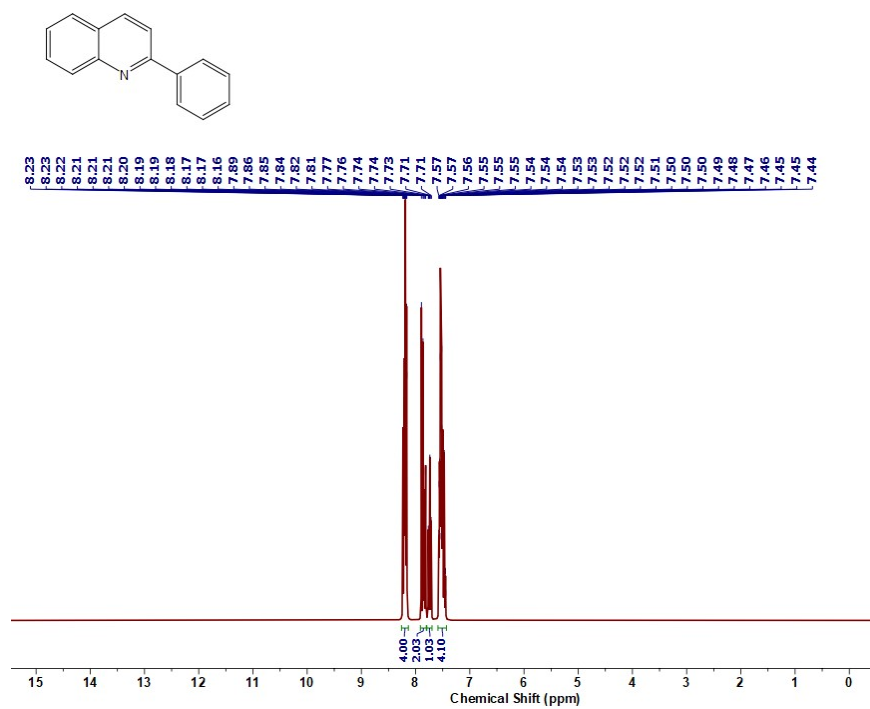

Figure S51: <sup>1</sup>H NMR spectrum of 10a

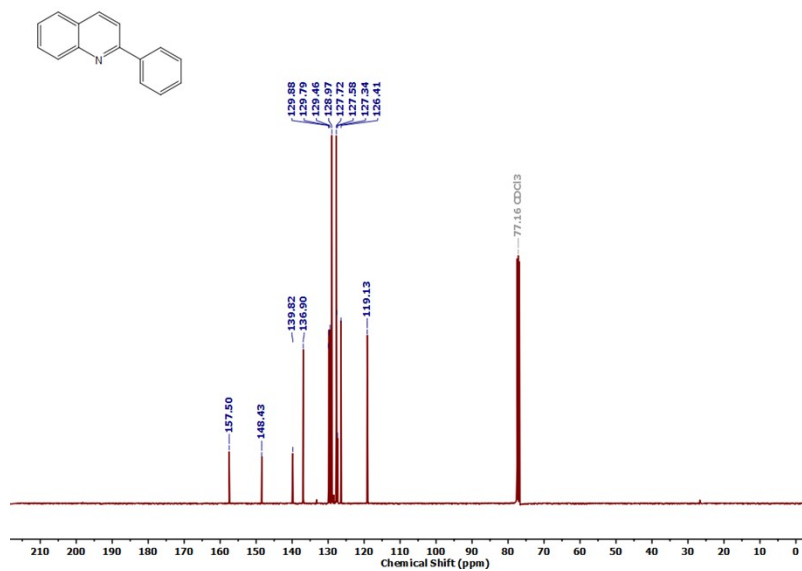

Figure S52: <sup>13</sup>C NMR spectrum of 10a

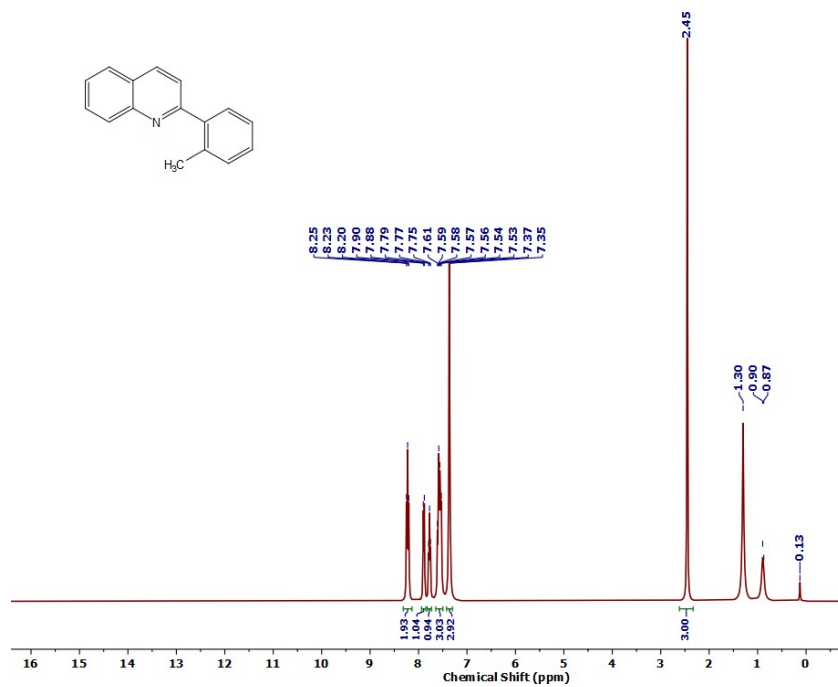

Figure S53:  $^1\text{H}$  NMR spectrum of 10b

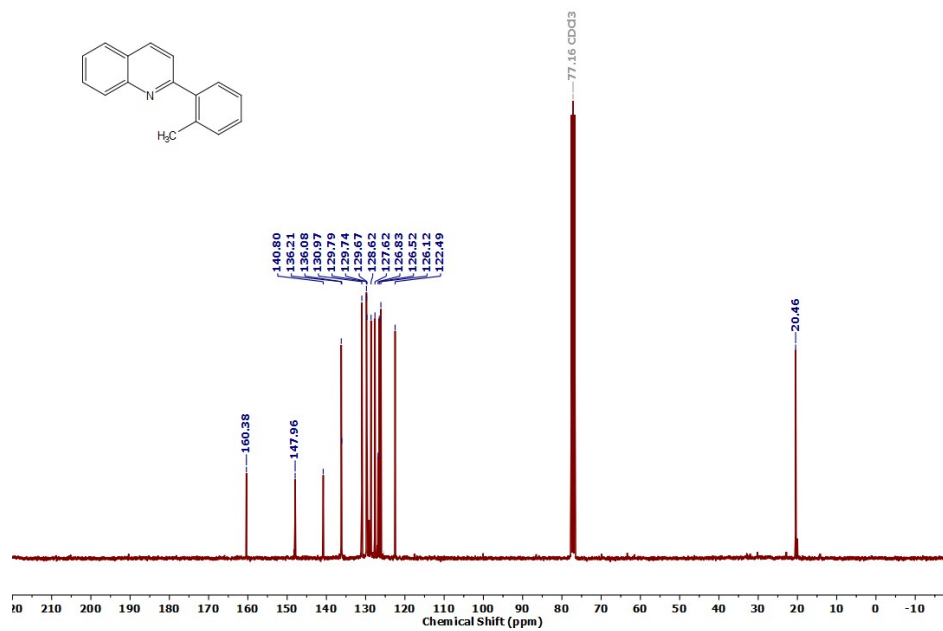

Figure S54:  $^{13}\text{C}$  NMR spectrum of **10b**

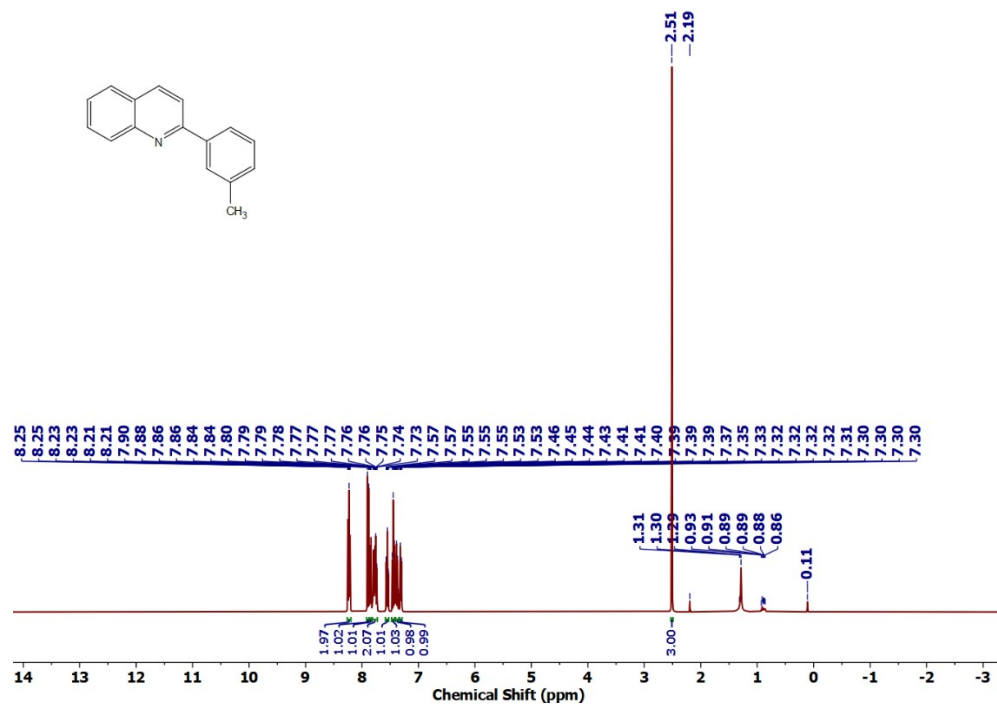

Figure S55:  $^1\text{H}$  NMR spectrum of **10c**

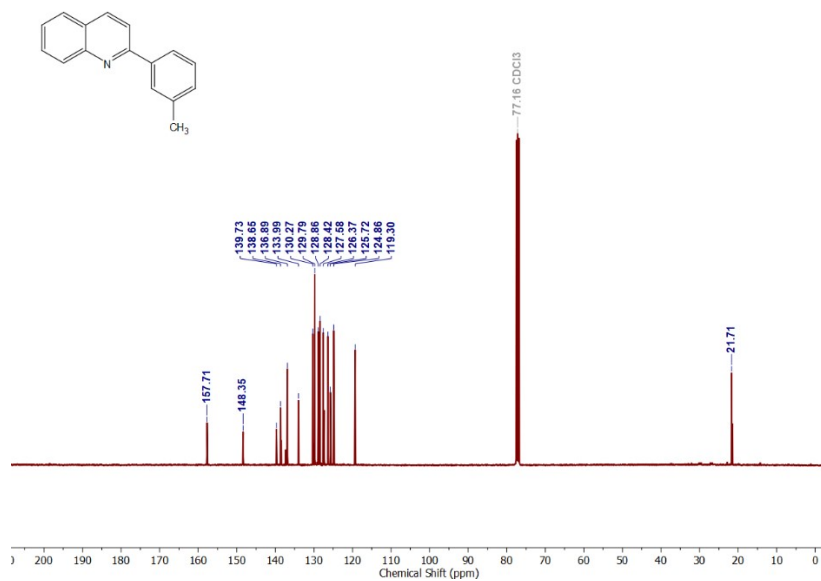

Figure S56:  $^{13}\text{C}$  NMR spectrum of **10c**

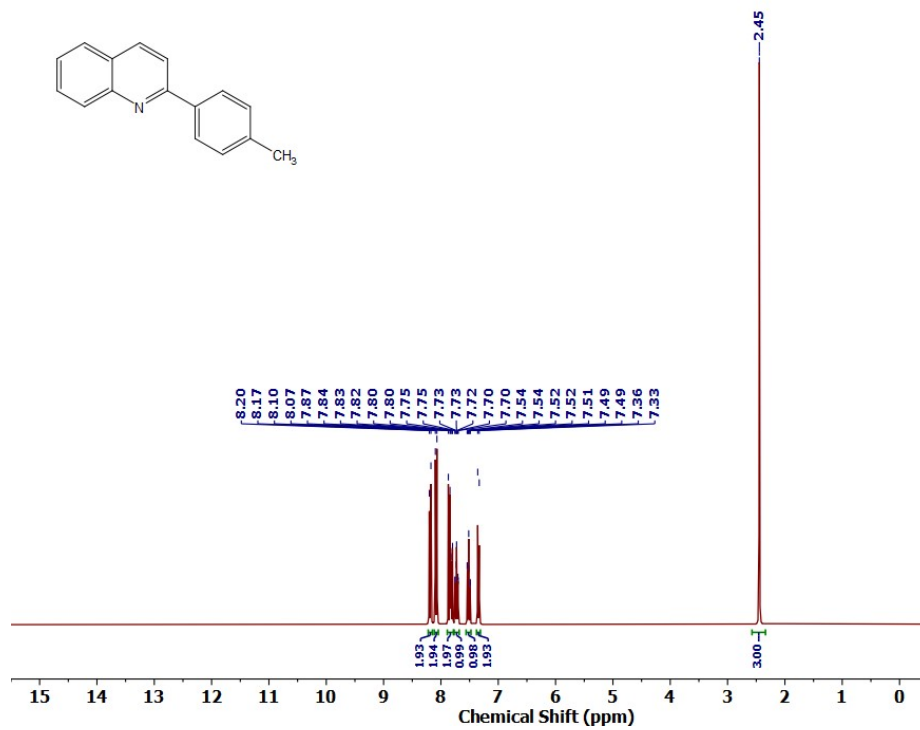

Figure S57:  $^1\text{H}$  NMR spectrum of 10d

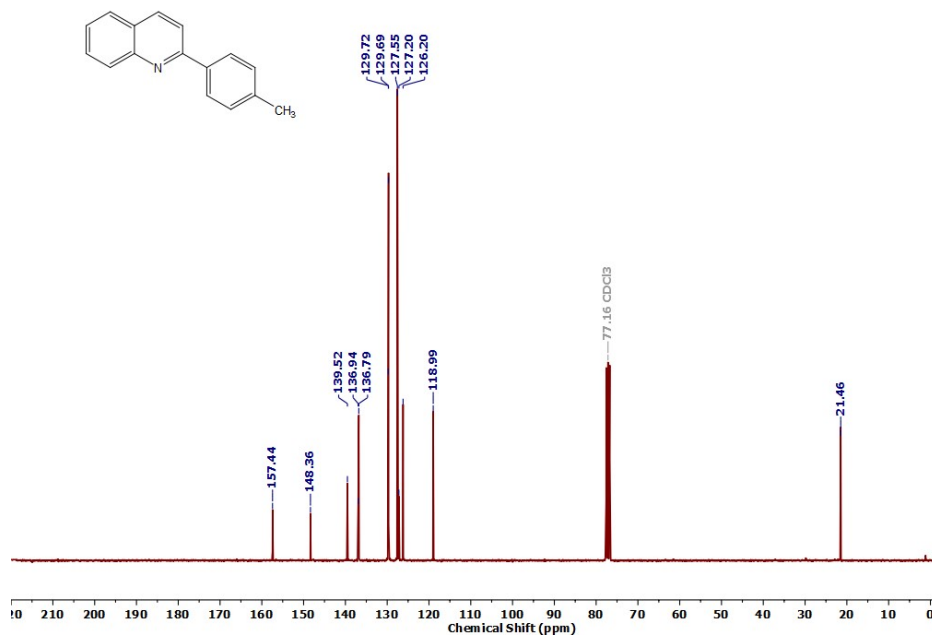

Figure S58:  $^{13}\text{C}$  NMR spectrum of 10d

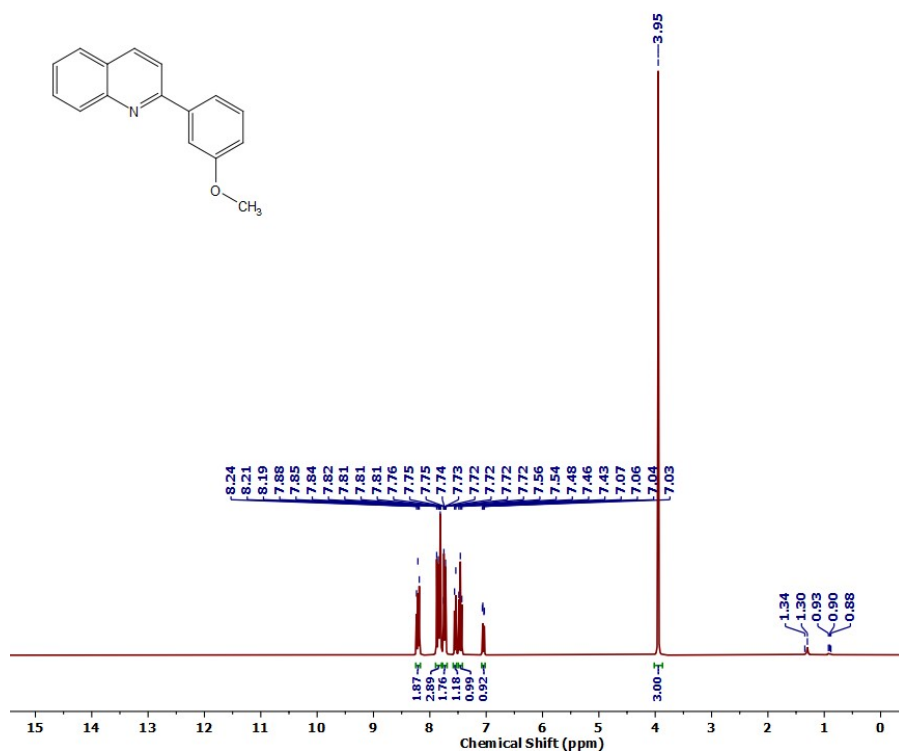

Figure S59:  $^1\text{H}$  NMR spectrum of 10e

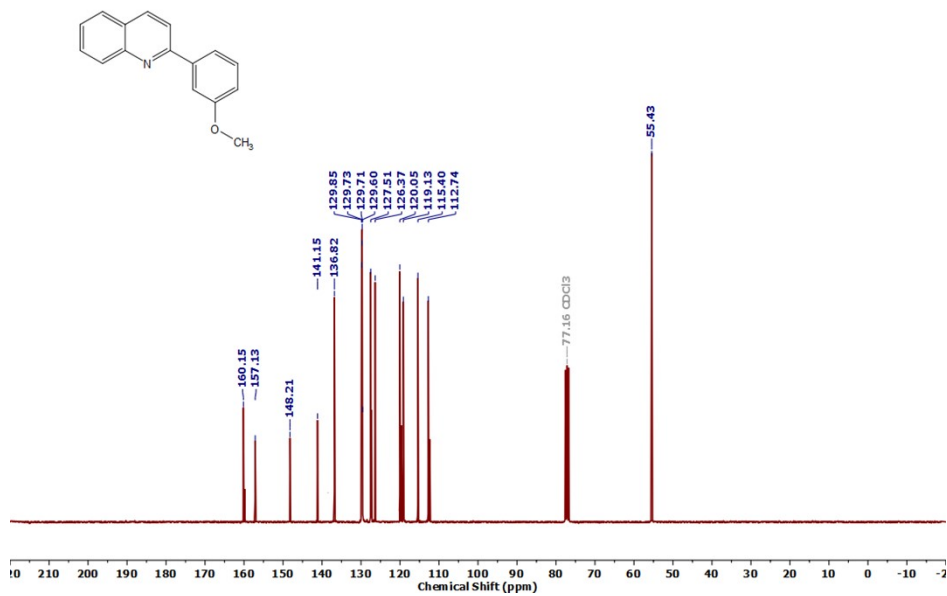

Figure S60:  $^{13}\text{C}$  NMR spectrum of **10e**

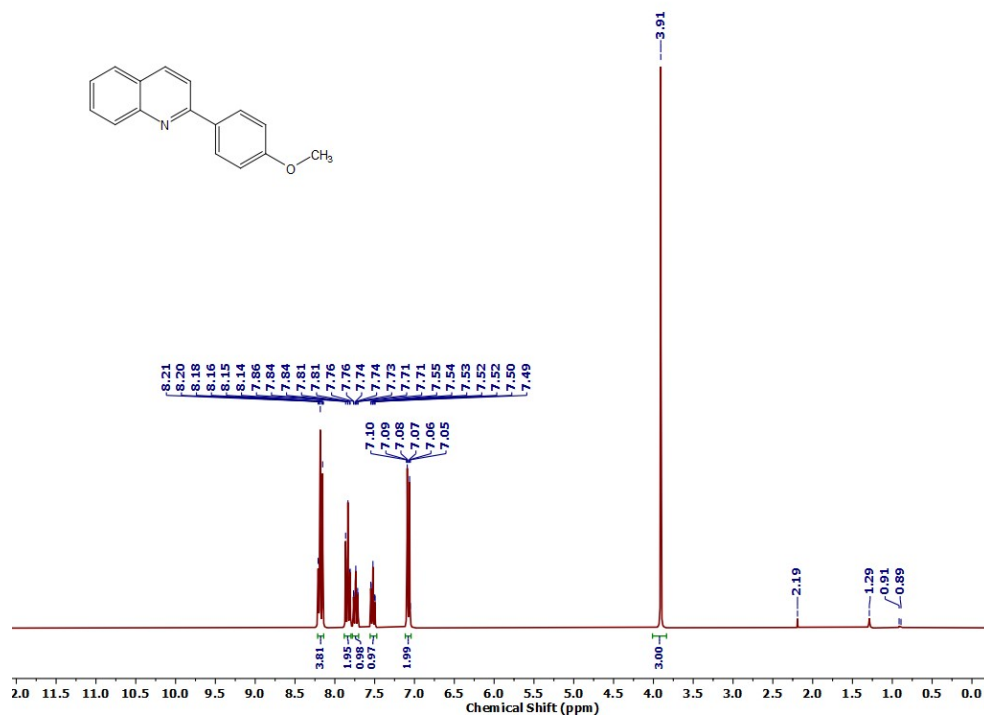

Figure S61:  $^1\text{H}$  NMR spectrum of **10f**

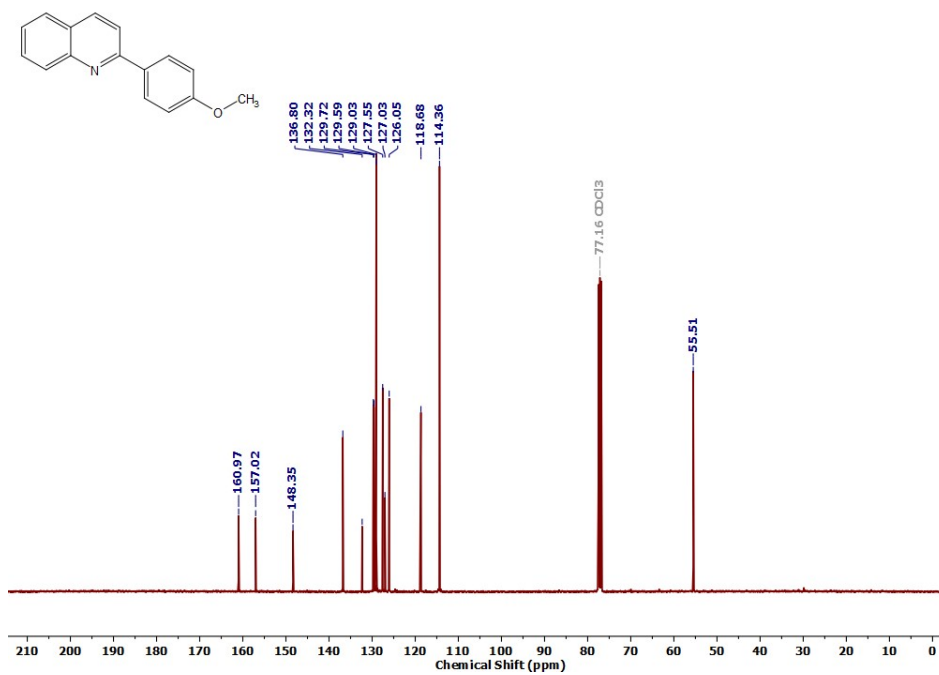

Figure S62:  $^{13}\text{C}$  NMR spectrum of **10f**



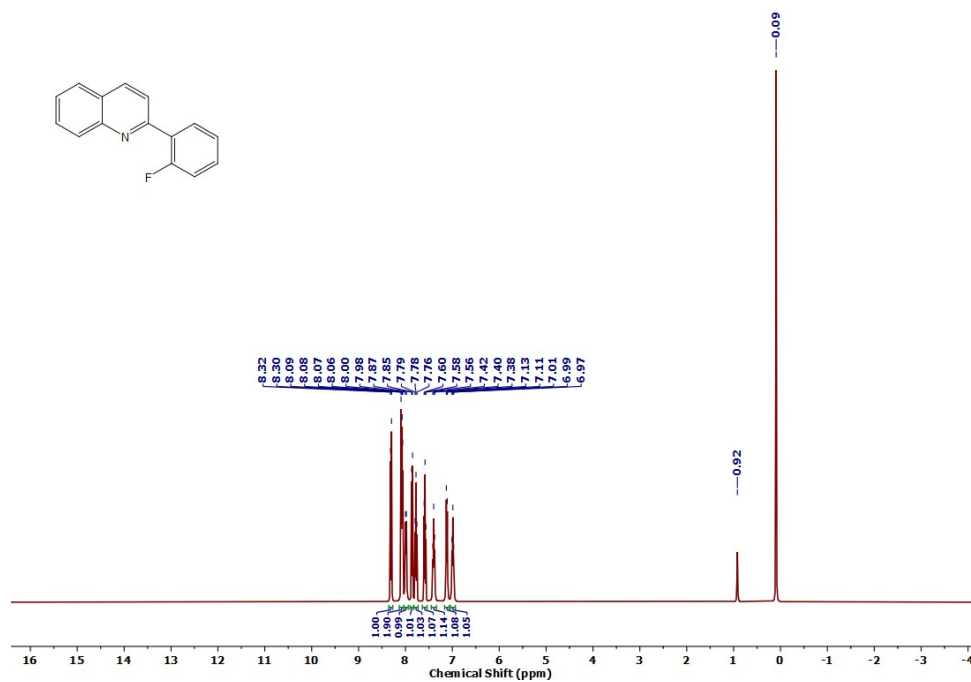

Figure S63: <sup>1</sup>H NMR spectrum of 10g

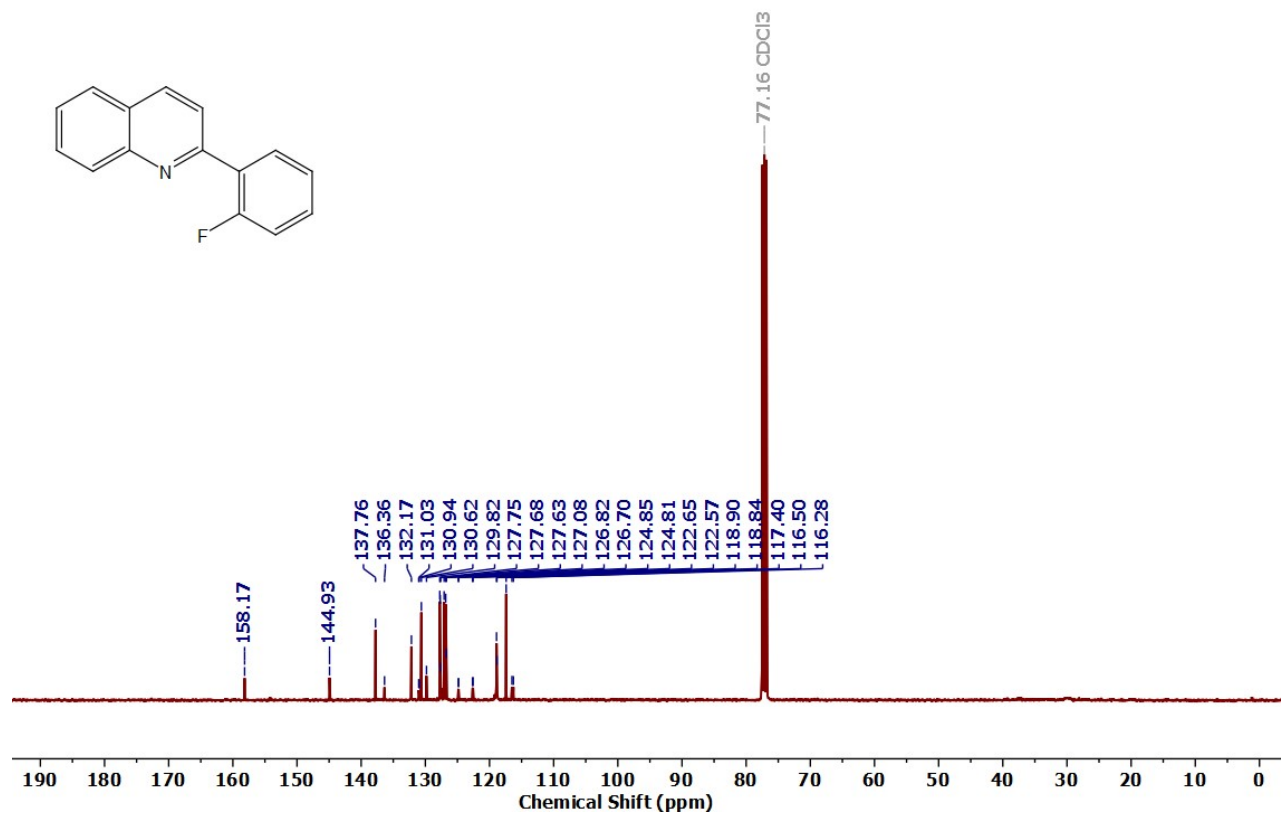

Figure S64: <sup>13</sup>C NMR spectrum of 10g

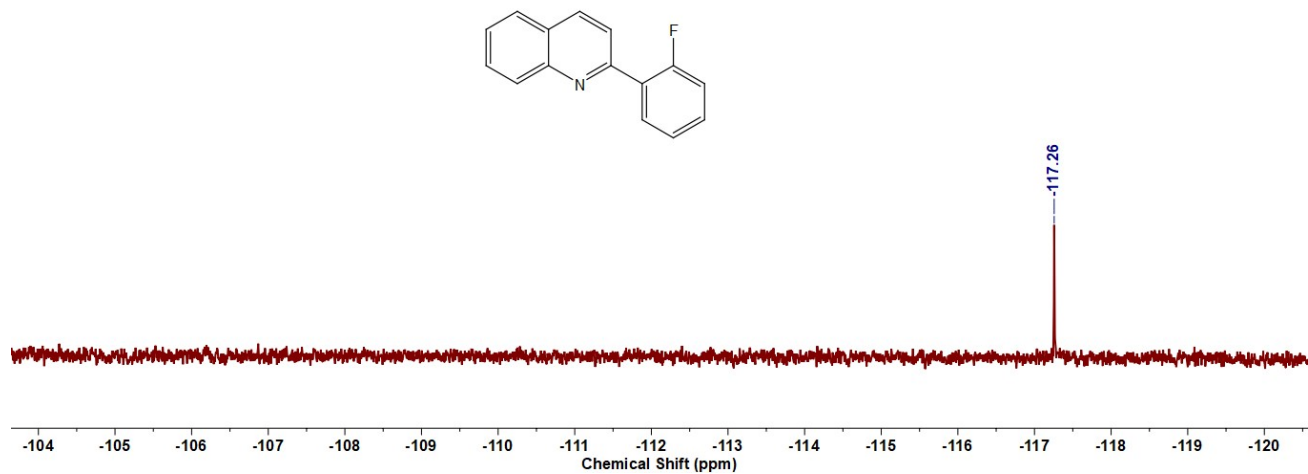

Figure S65:  $^{19}\text{F}$  NMR spectrum of 10g

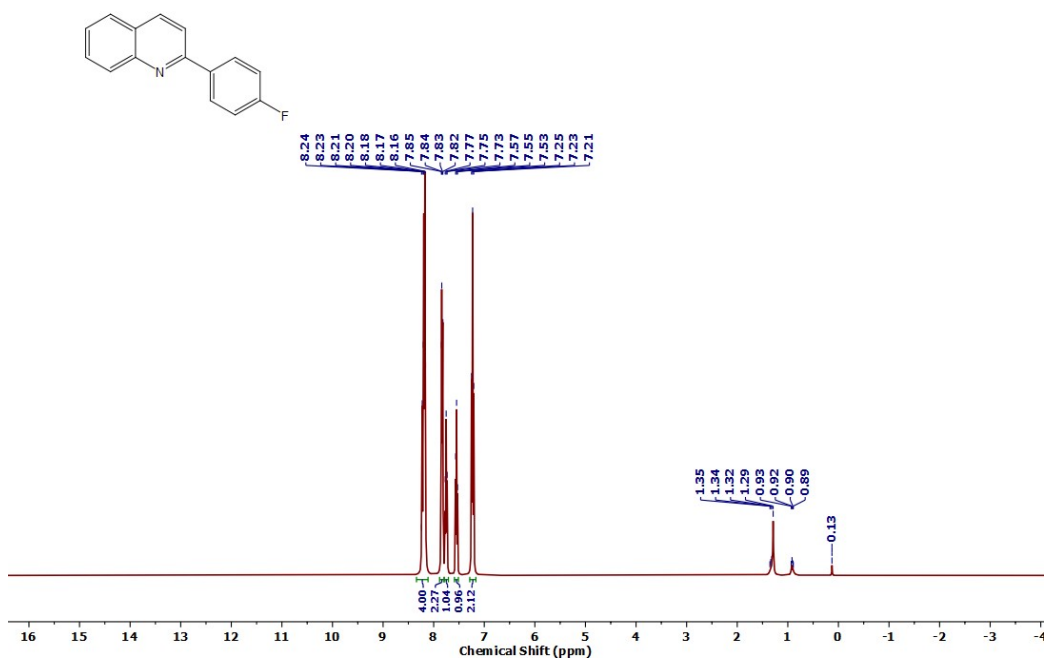

Figure S66:  $^1\text{H}$  NMR spectrum of 10h

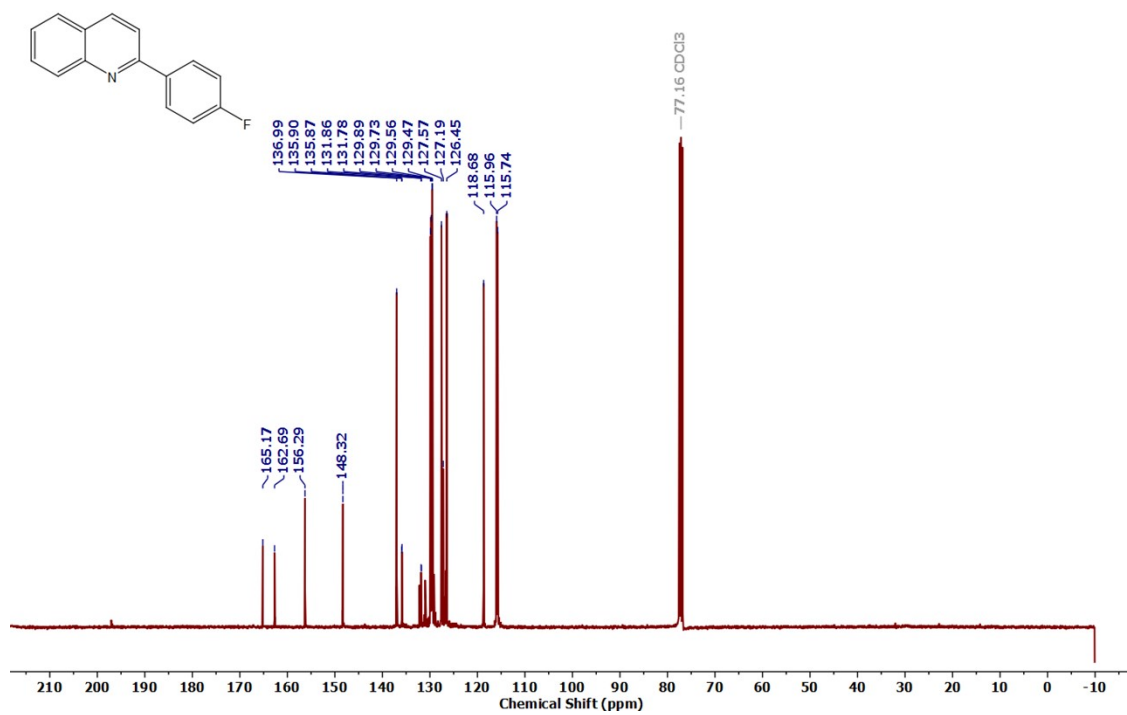

Figure S67: <sup>13</sup>C NMR spectrum of 10h

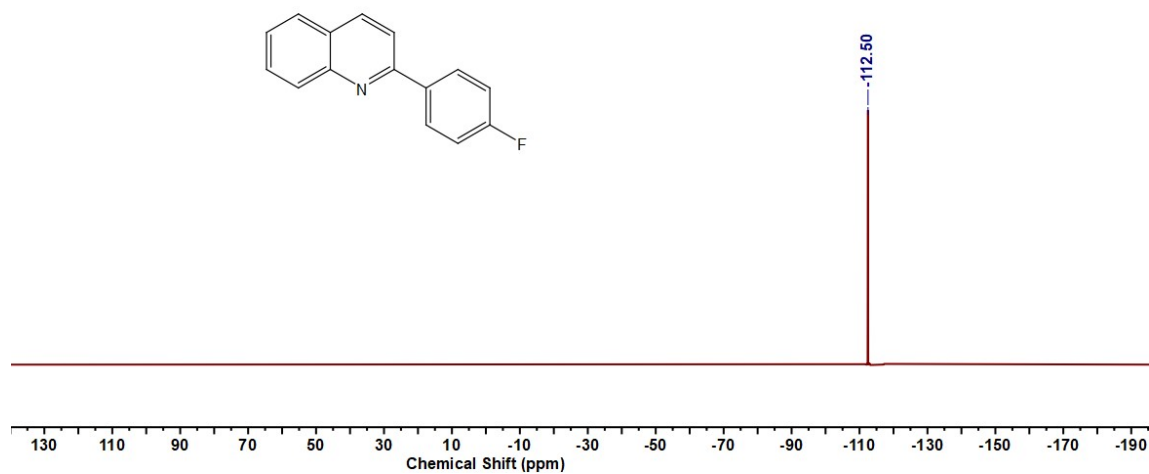

Figure S68: <sup>19</sup>F NMR spectrum of 10h

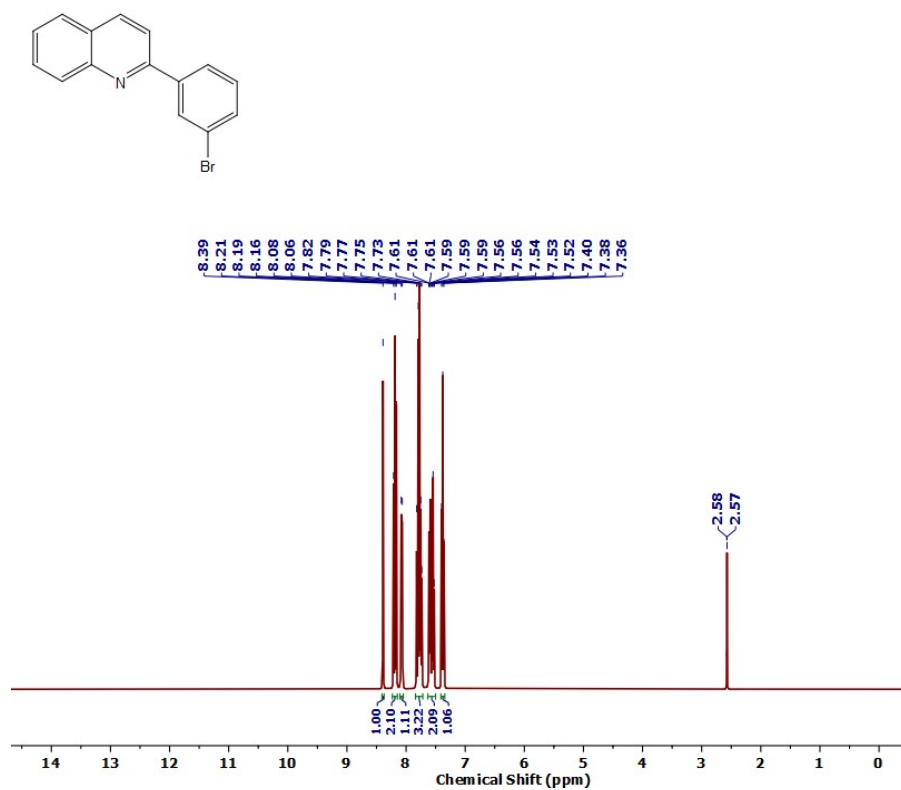

Figure S69:  $^1\text{H}$  NMR spectrum of 10i

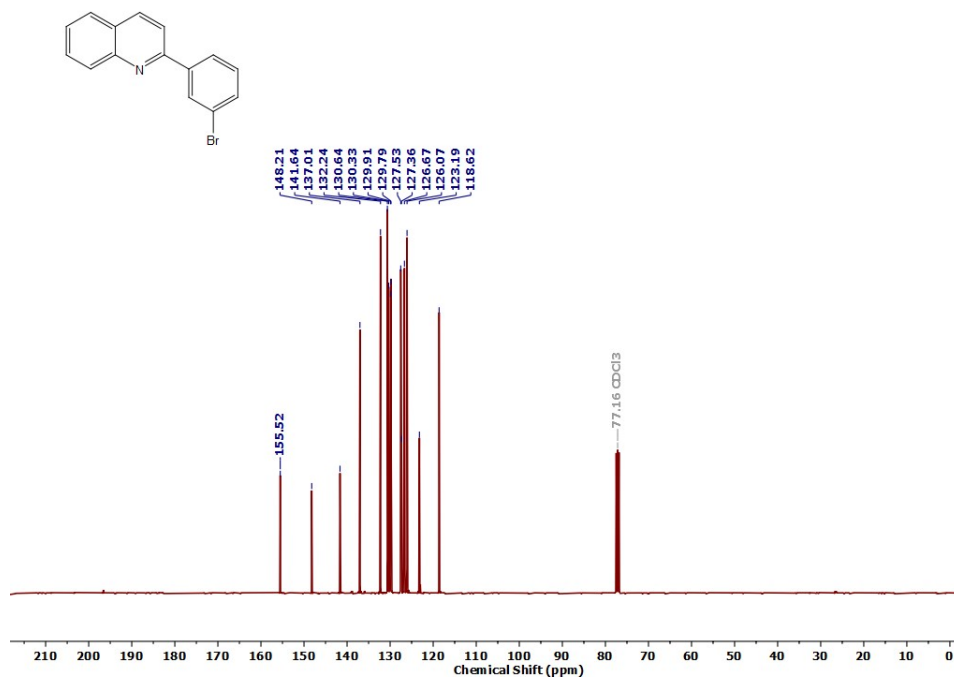

Figure S70:  $^{13}\text{C}$  NMR spectrum of 10i

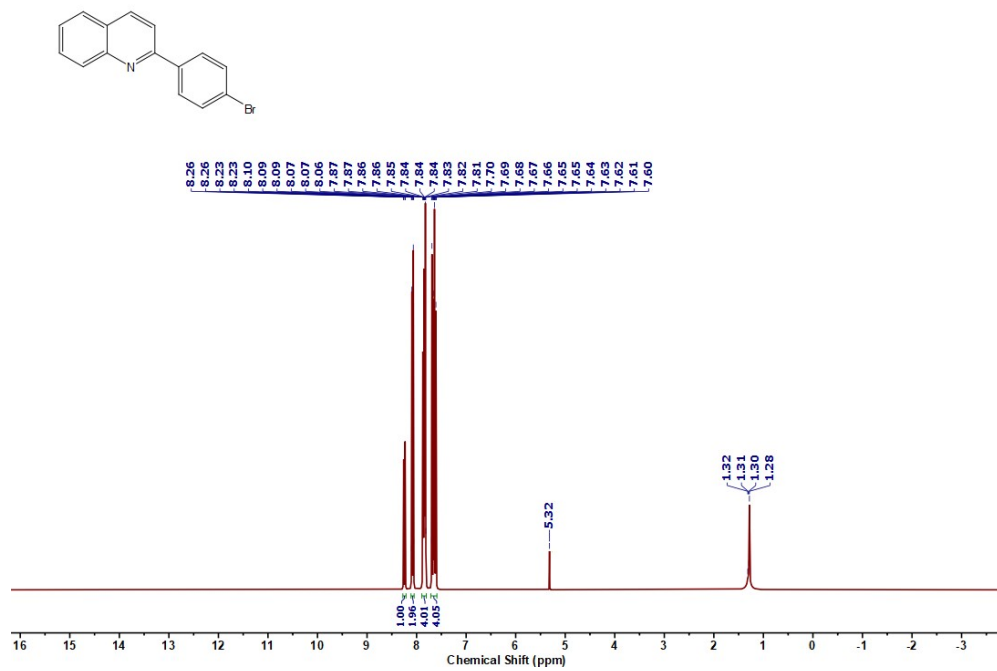

Figure S71:  $^1\text{H}$  NMR spectrum of **10j**

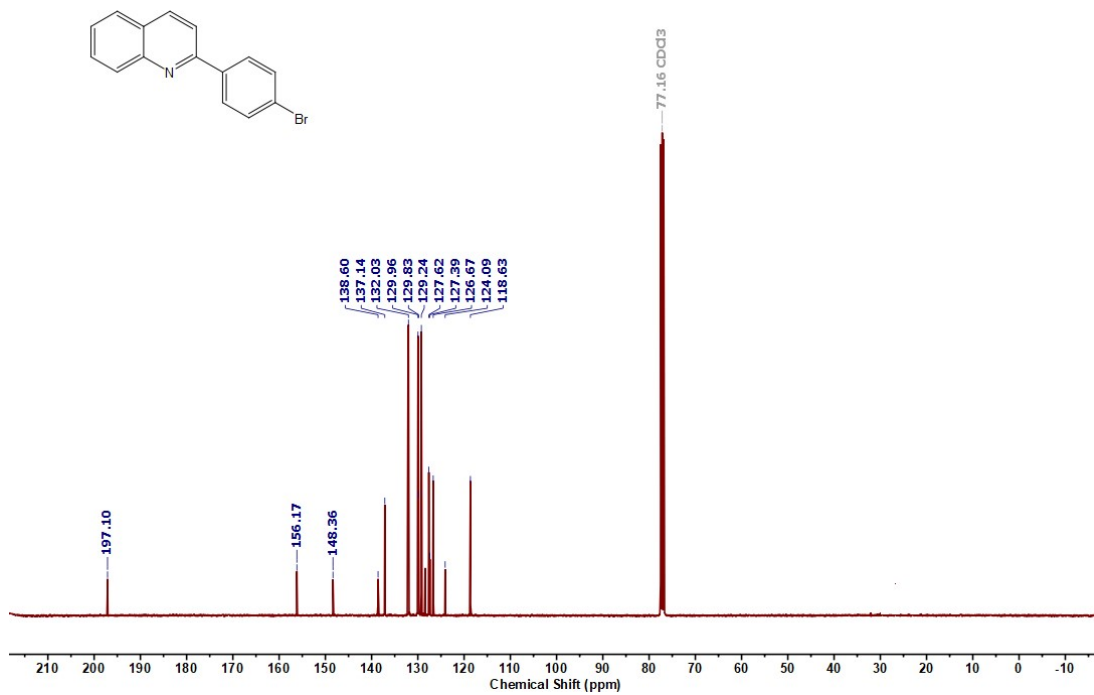

Figure S72:  $^{13}\text{C}$  NMR spectrum of **10j**





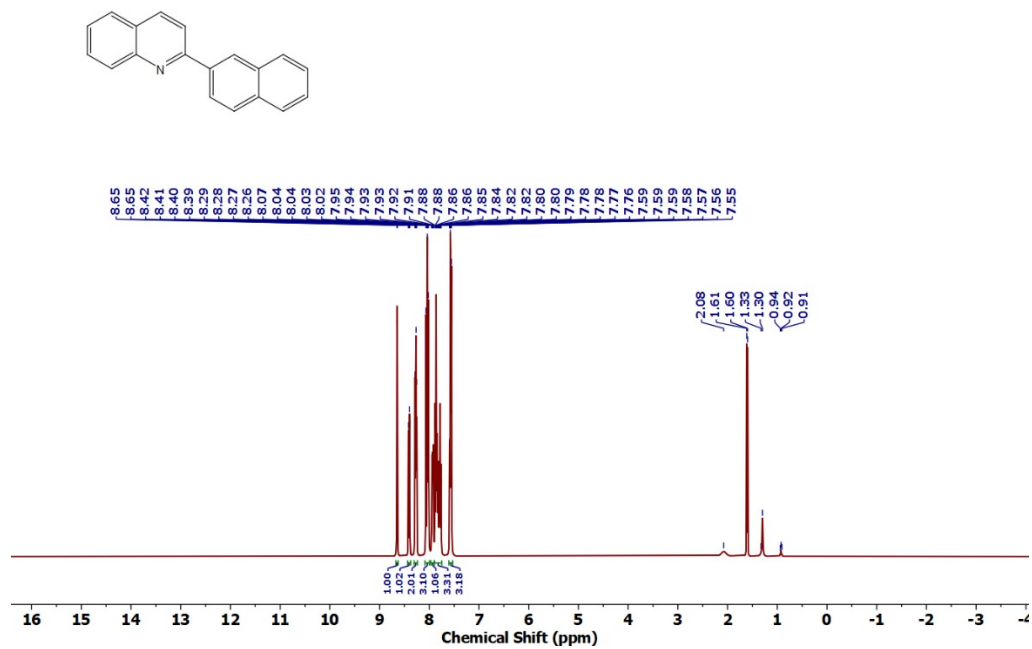

Figure S77: <sup>1</sup>H NMR spectrum of 10m

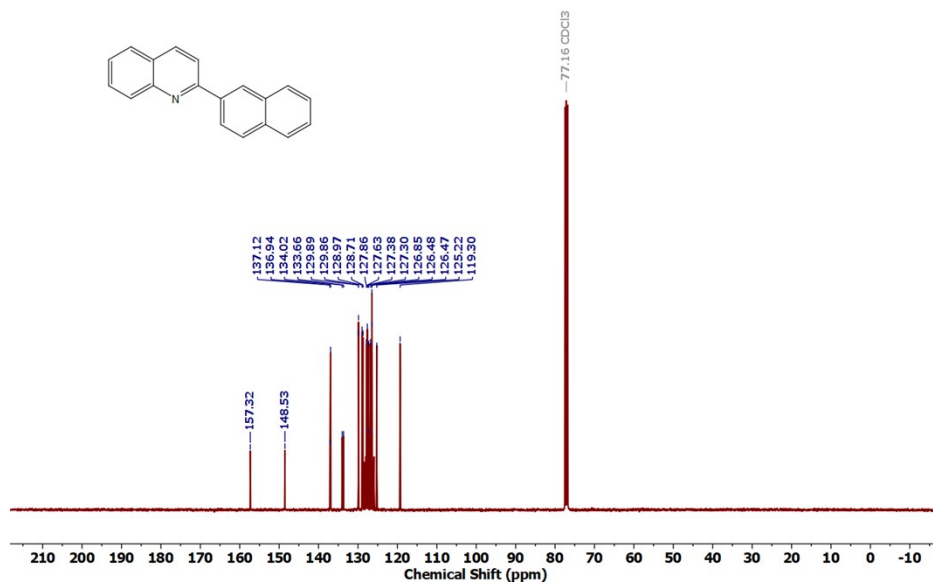

Figure S78: <sup>13</sup>C NMR spectrum of 10m



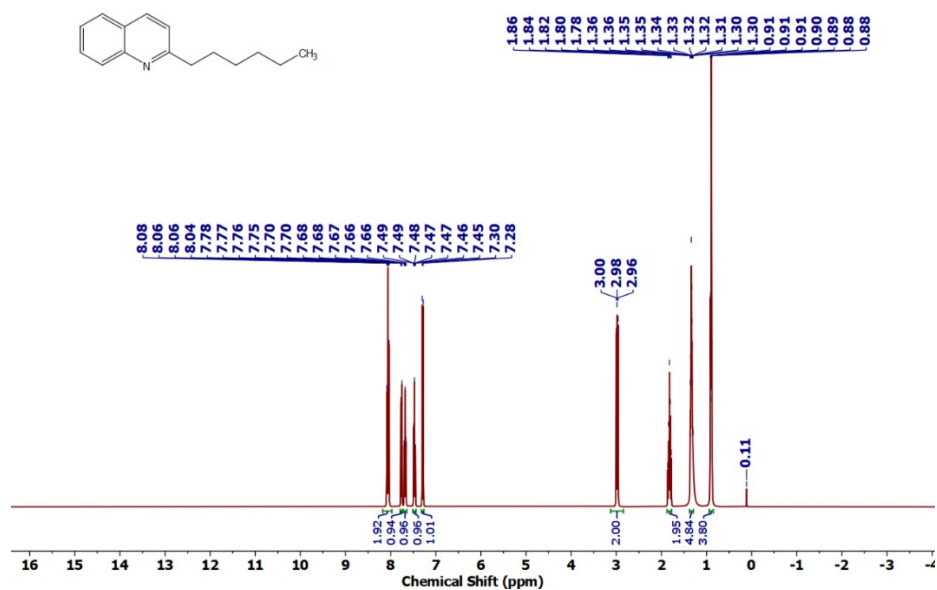

Figure S79: <sup>1</sup>H NMR spectrum of 10n

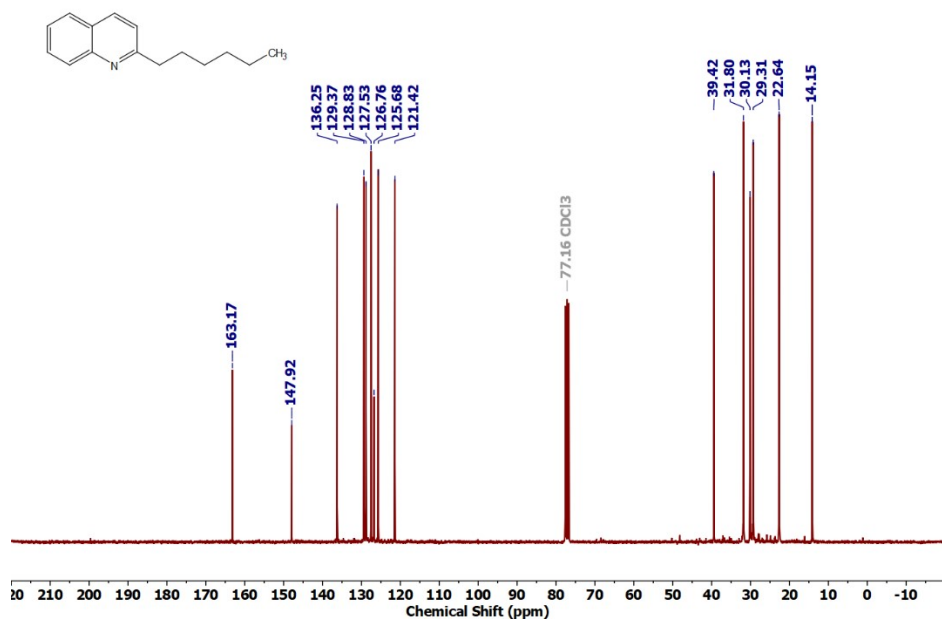

Figure S80: <sup>13</sup>C NMR spectrum of 10n

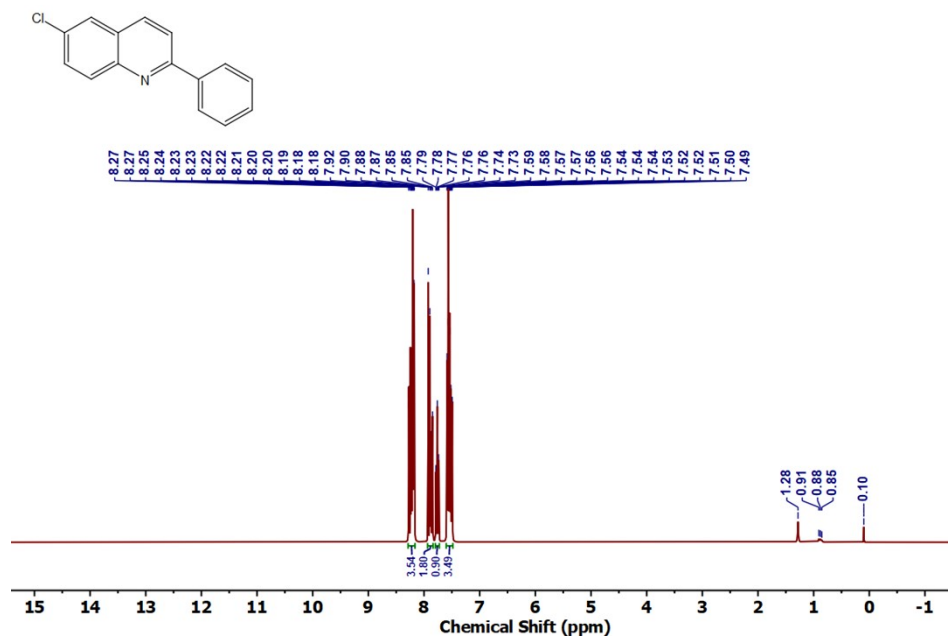

Figure S81: <sup>1</sup>H NMR spectrum of 10o

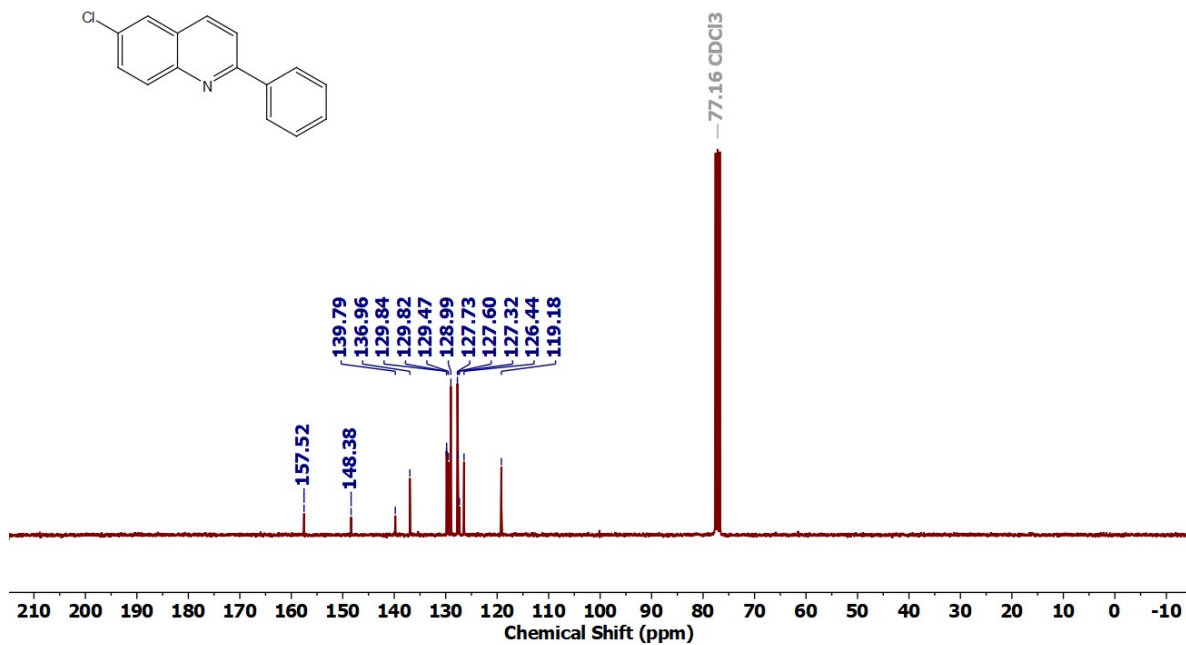

Figure S82: <sup>13</sup>C NMR spectrum of 10o

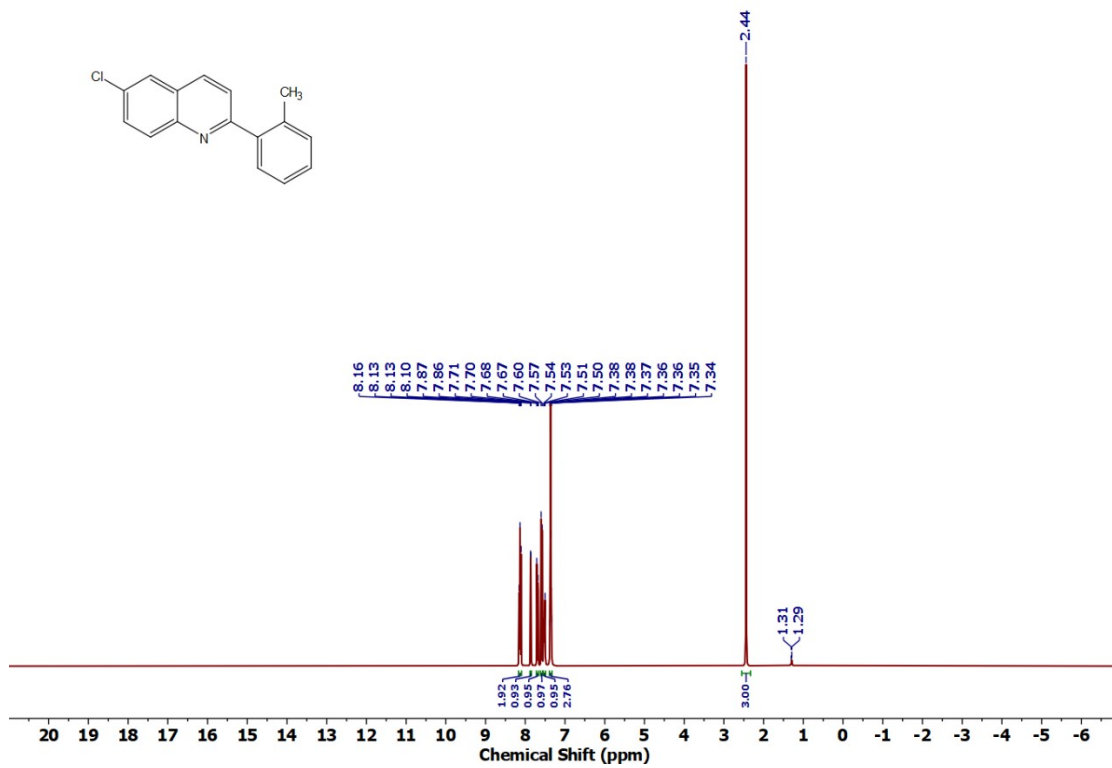

Figure S83: <sup>1</sup>H NMR spectrum of 10p

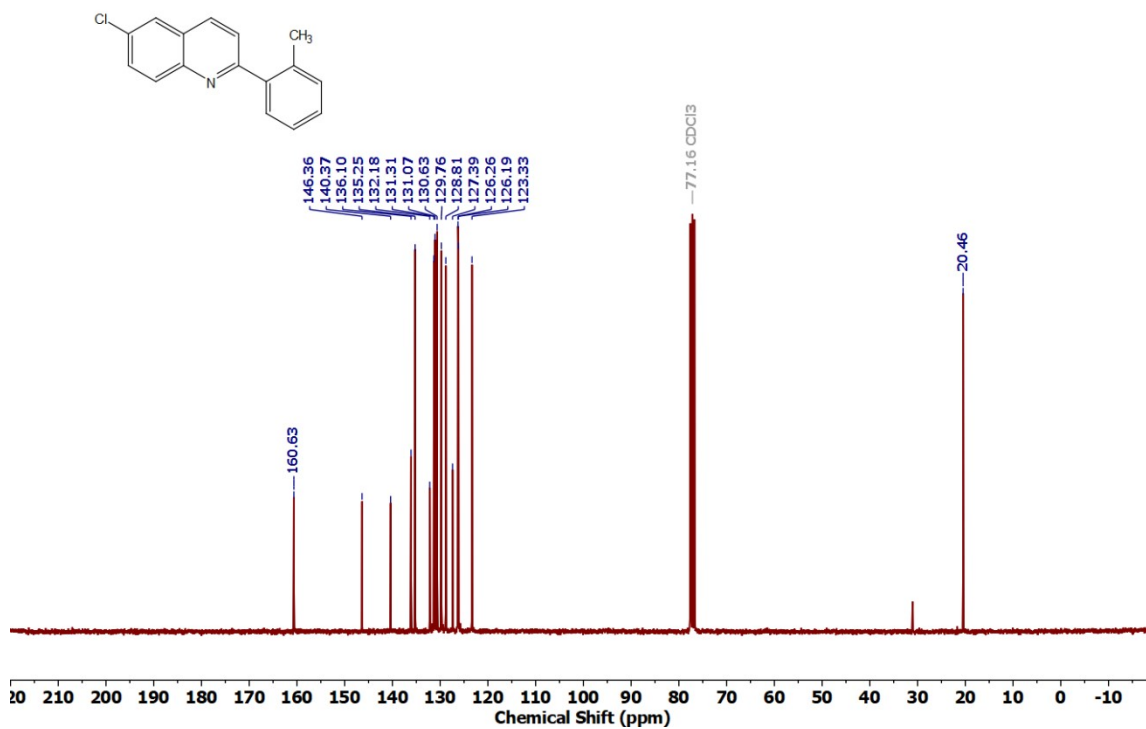

Figure S84:  $^{13}\text{C}$  NMR spectrum of **10p**

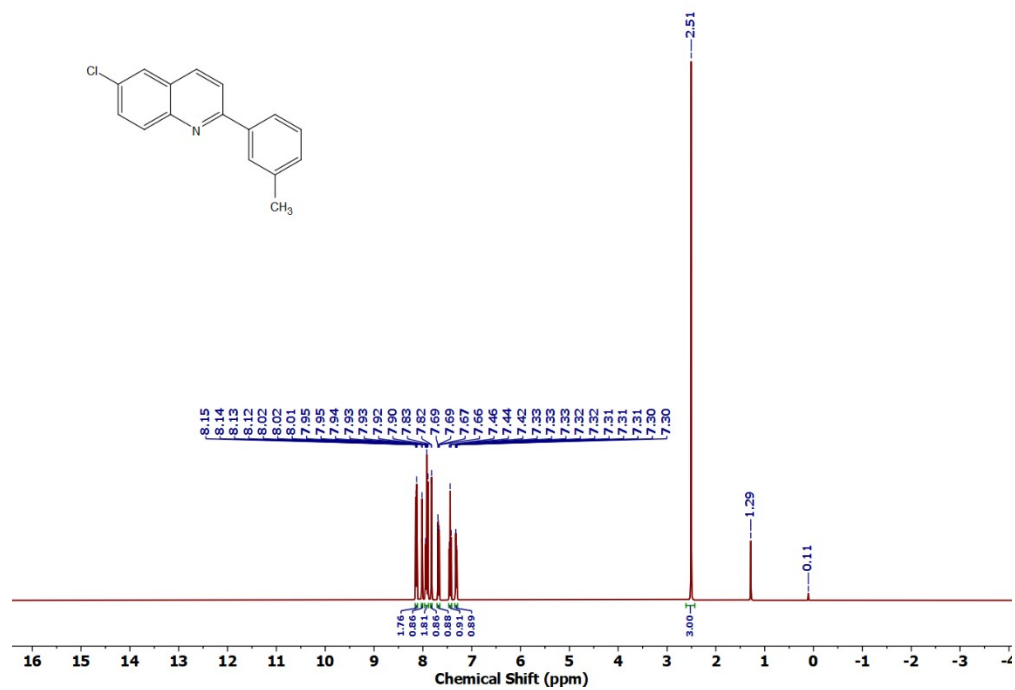

Figure S85:  $^1\text{H}$  NMR spectrum of **10q**

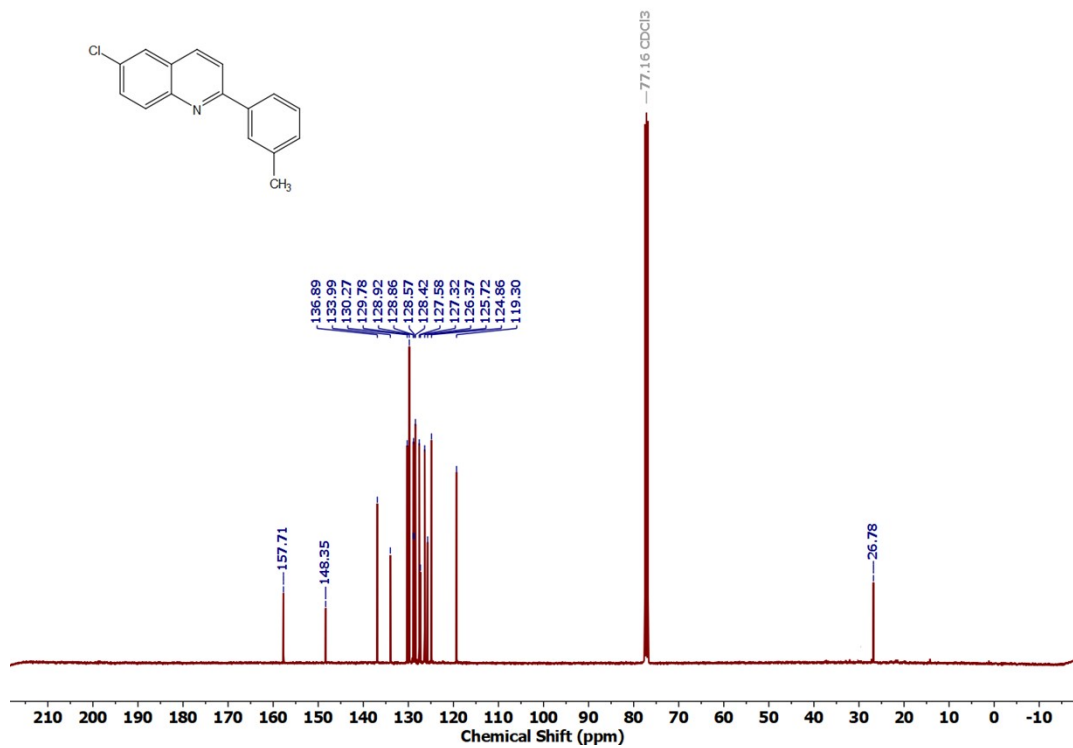

Figure S86:  $^{13}\text{C}$  NMR spectrum of **10q**

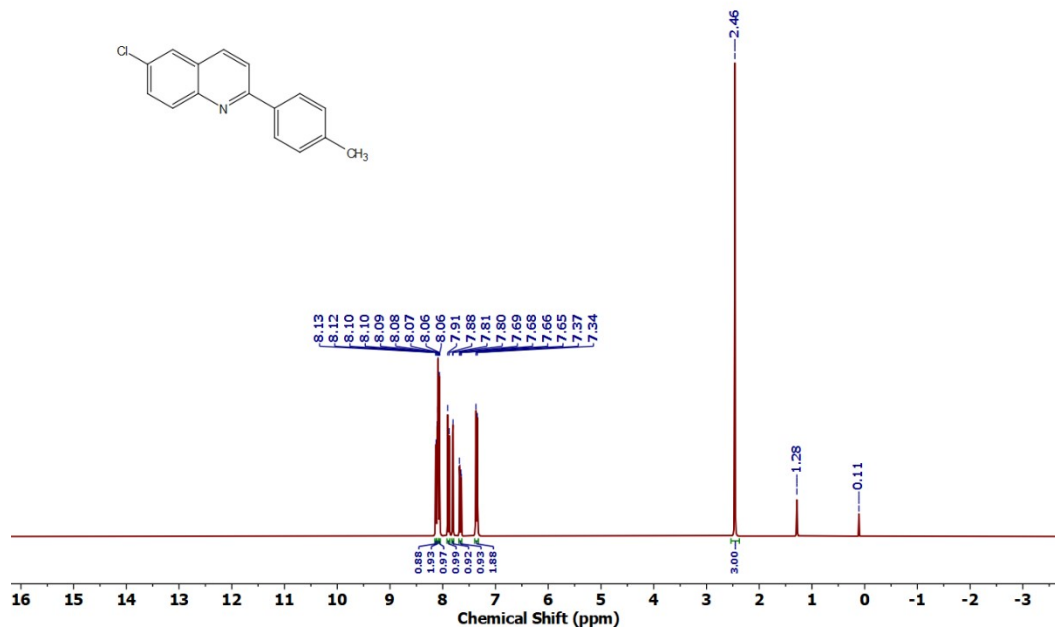

Figure S87:  $^1\text{H}$  NMR spectrum of 10r

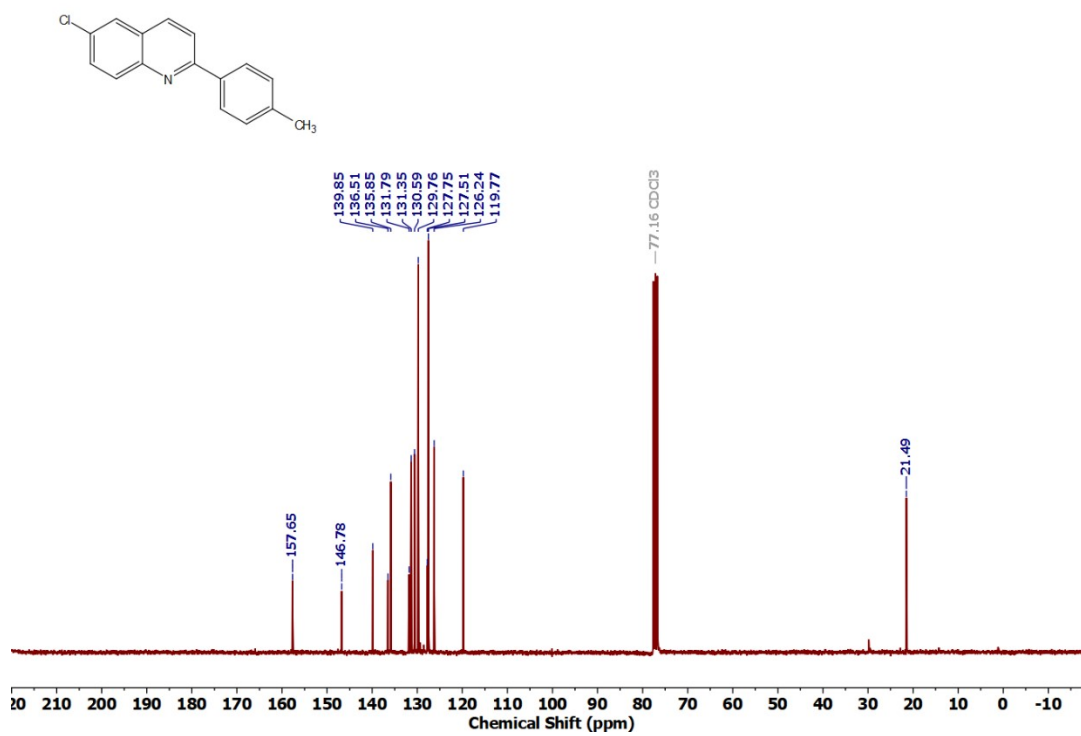

Figure S88:  $^{13}\text{C}$  NMR spectrum of 10r

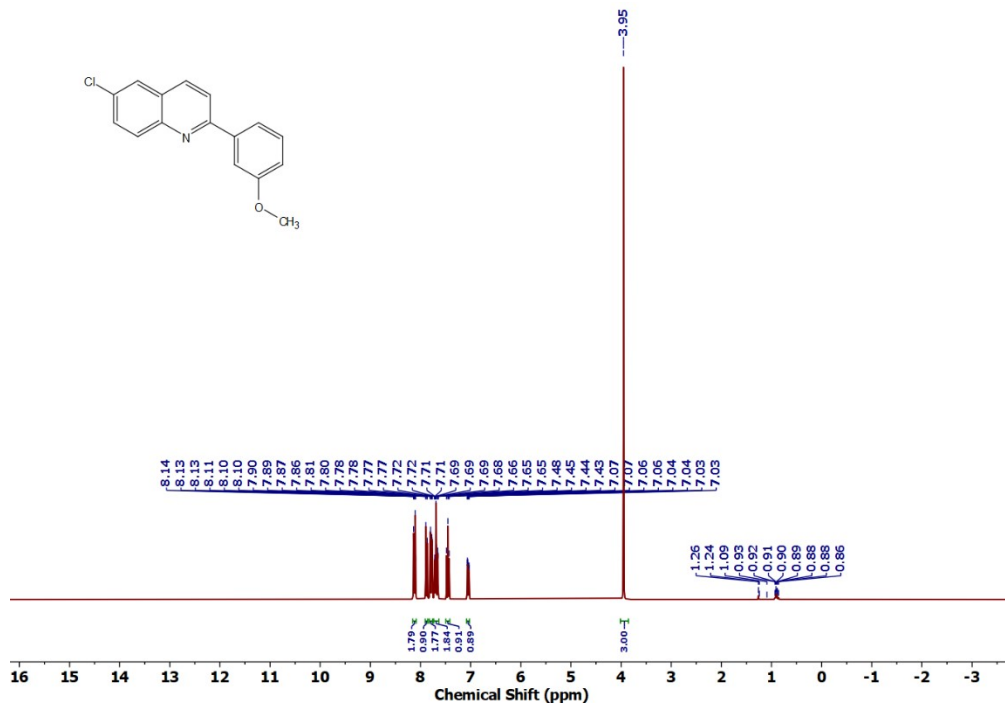

Figure S89:  $^1\text{H}$  NMR spectrum of 10s

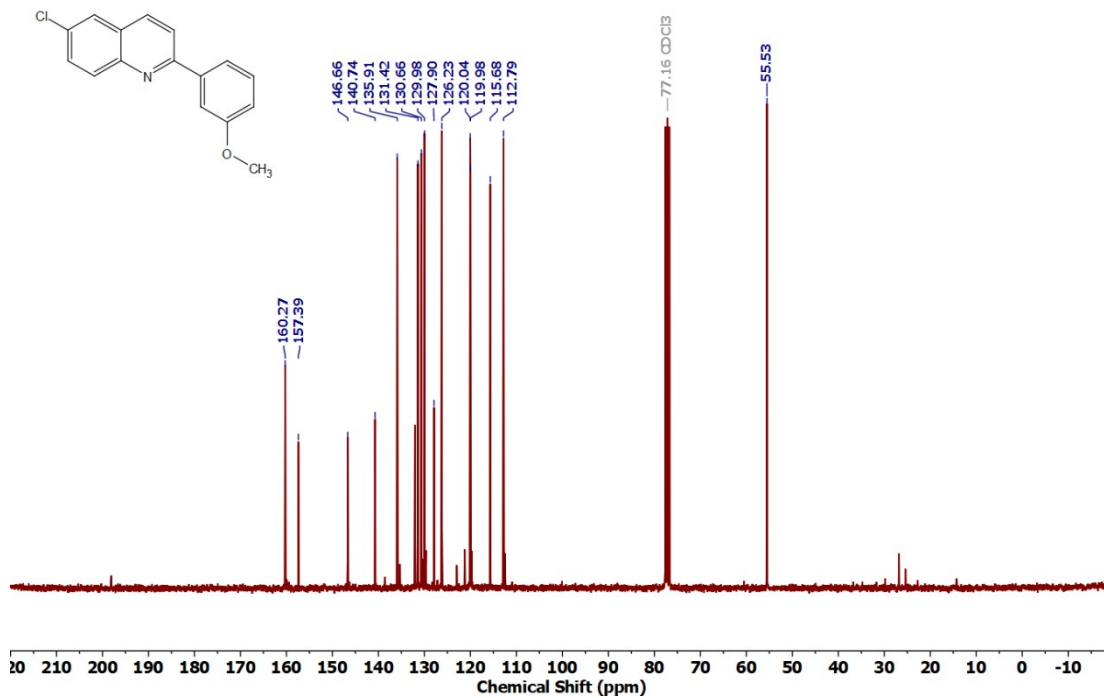

Figure S90:  $^{13}\text{C}$  NMR spectrum of 10s

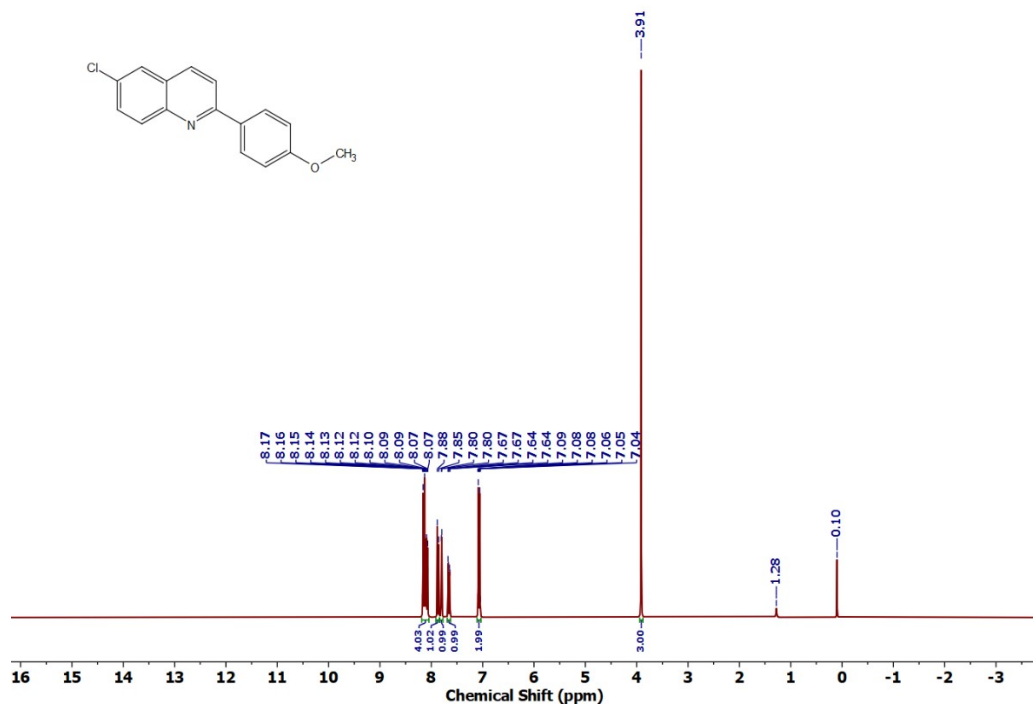

Figure S91:  $^1\text{H}$  NMR spectrum of 10t

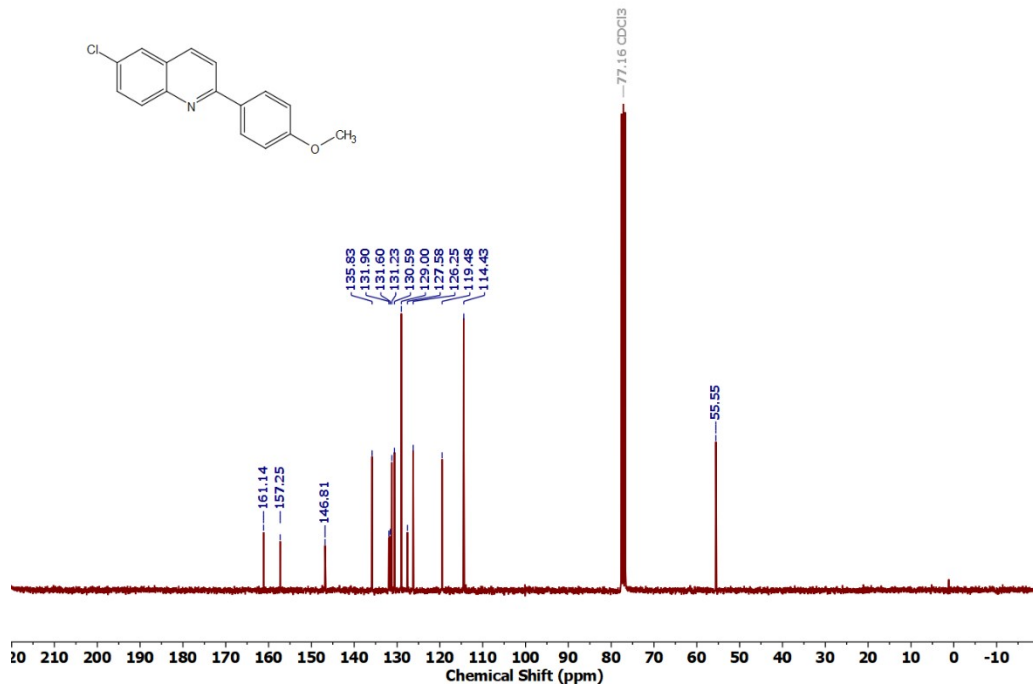

Figure S92:  $^{13}\text{C}$  NMR spectrum of 10t

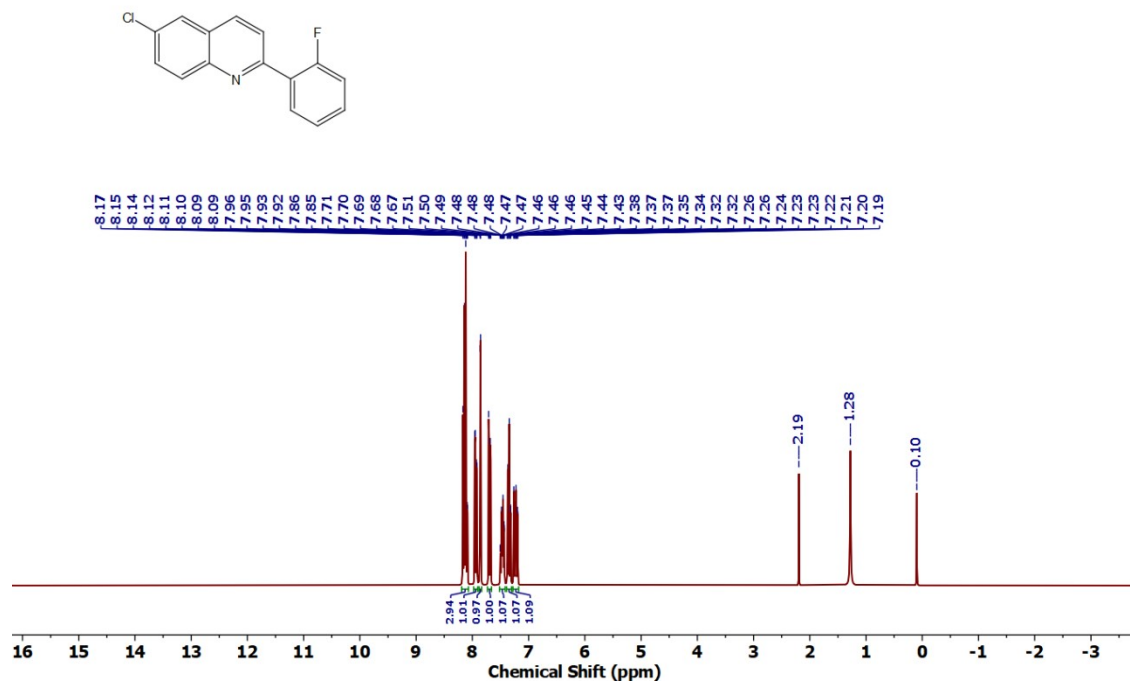

Figure S93: <sup>1</sup>H NMR spectrum of 10u



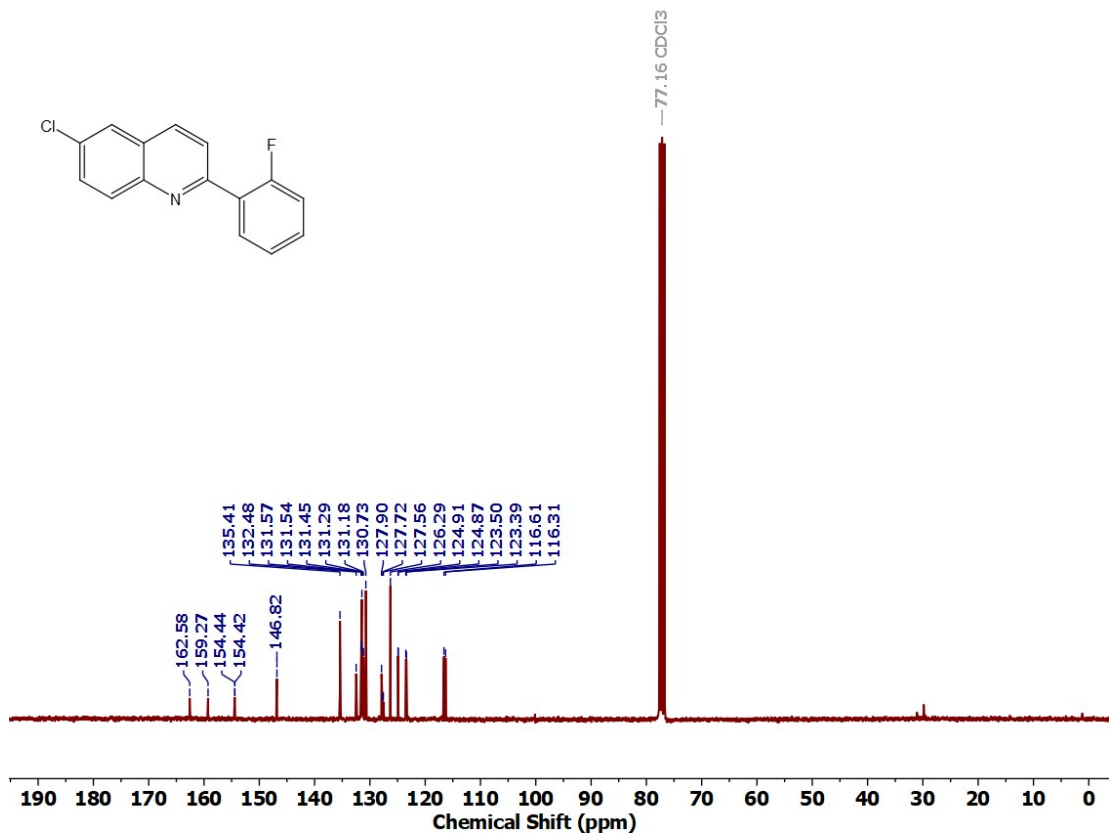

Figure S94: <sup>13</sup>C NMR spectrum of 10u

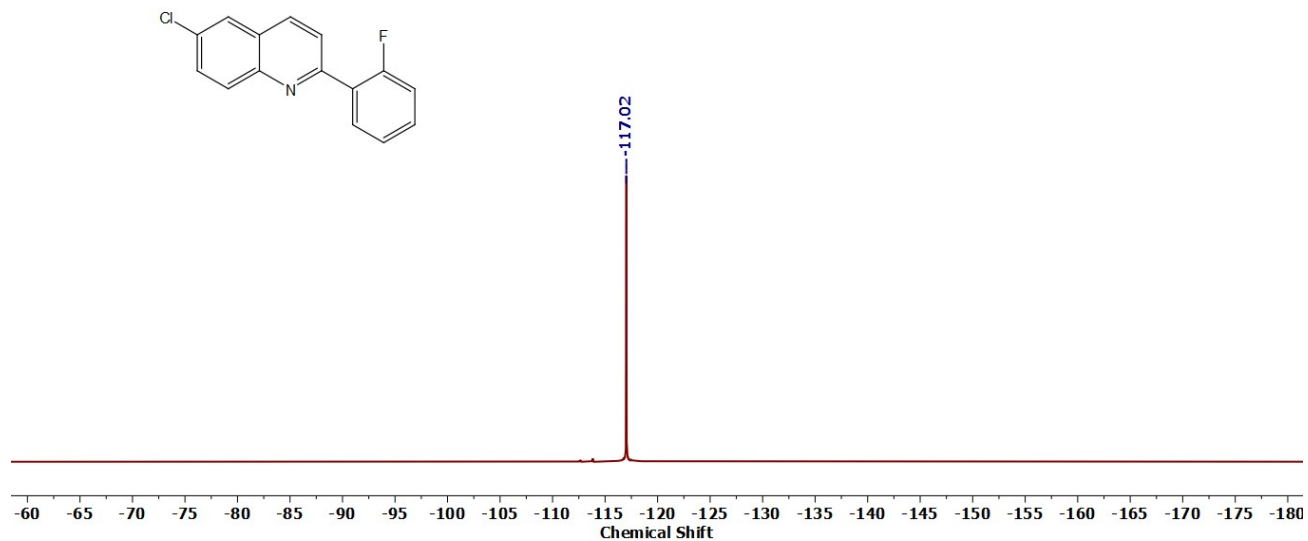

Figure S95: <sup>19</sup>F NMR spectrum of 10u

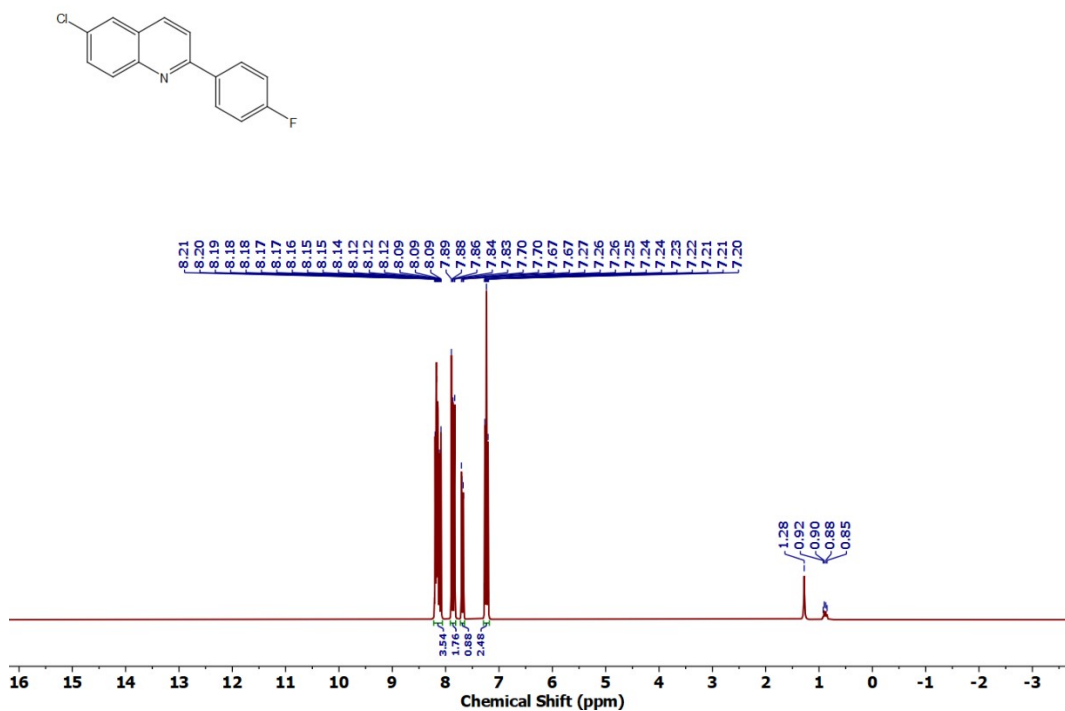

Figure S96: <sup>1</sup>H NMR spectrum of 10v

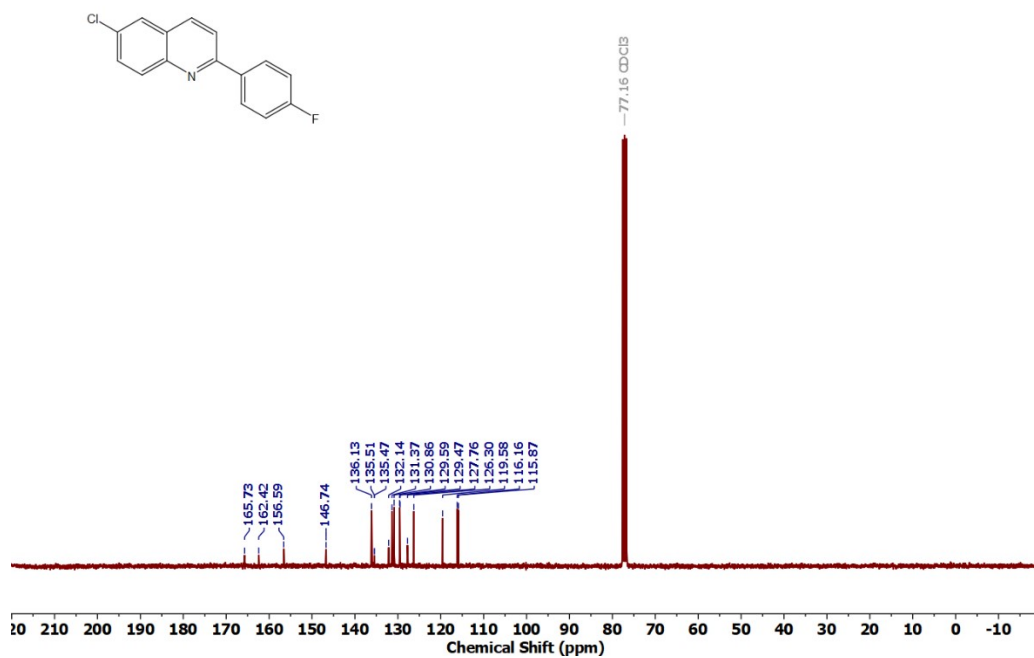

Figure S99: <sup>13</sup>C NMR spectrum of 10v

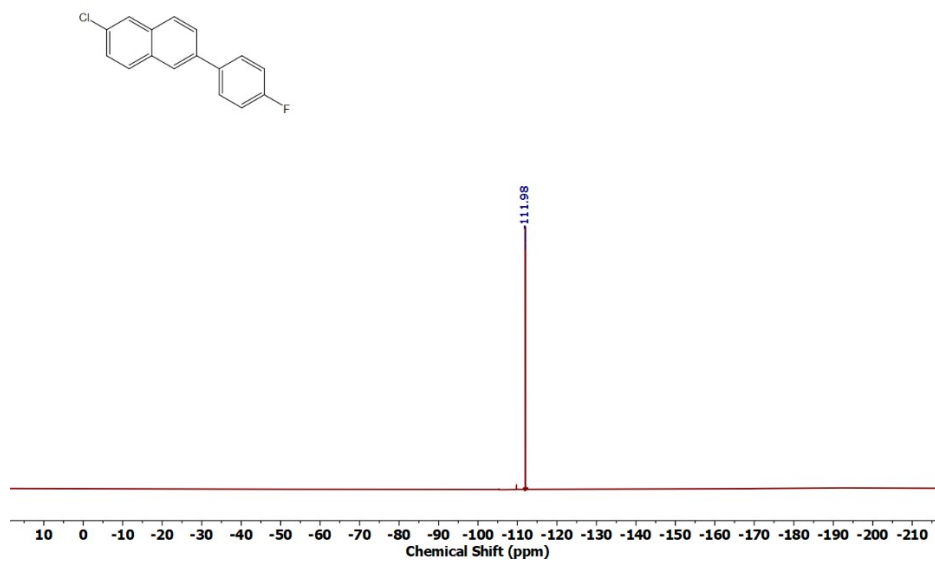

Figure S100:  $^{19}\text{F}$  NMR spectrum of 10v

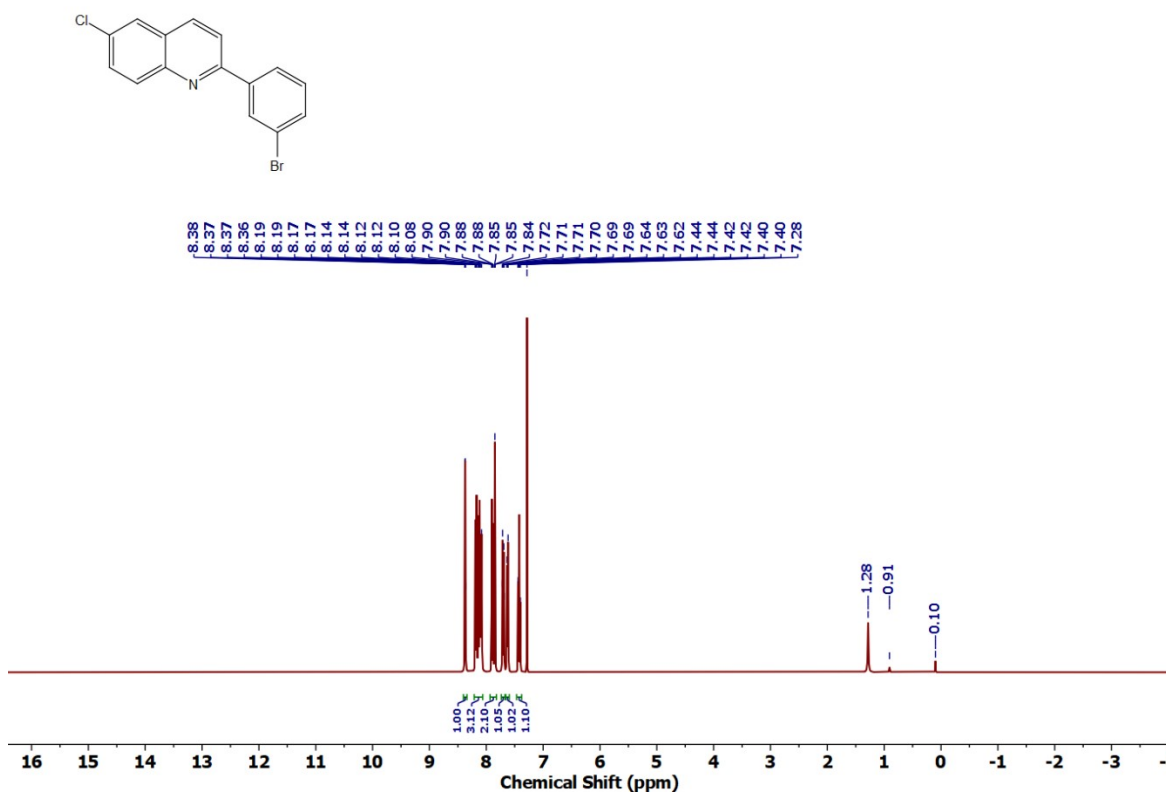

Figure S101:  $^1\text{H}$  NMR spectrum of 10w

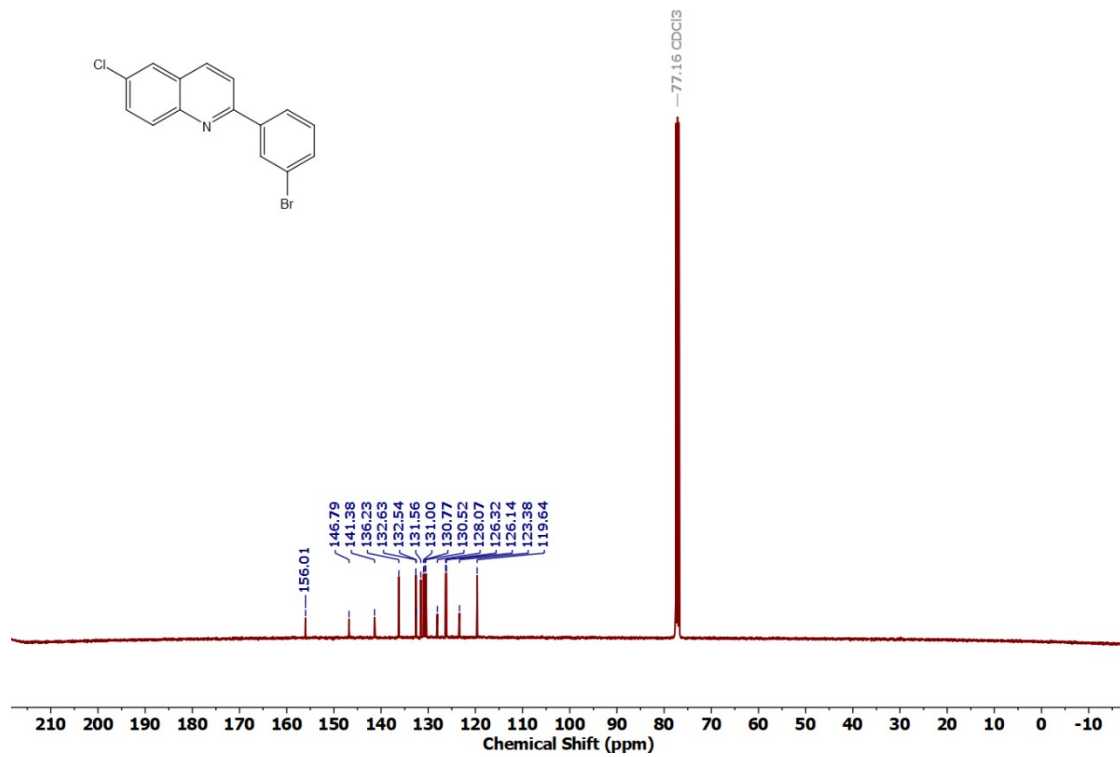

Figure S102: <sup>13</sup>C NMR spectrum of 10w

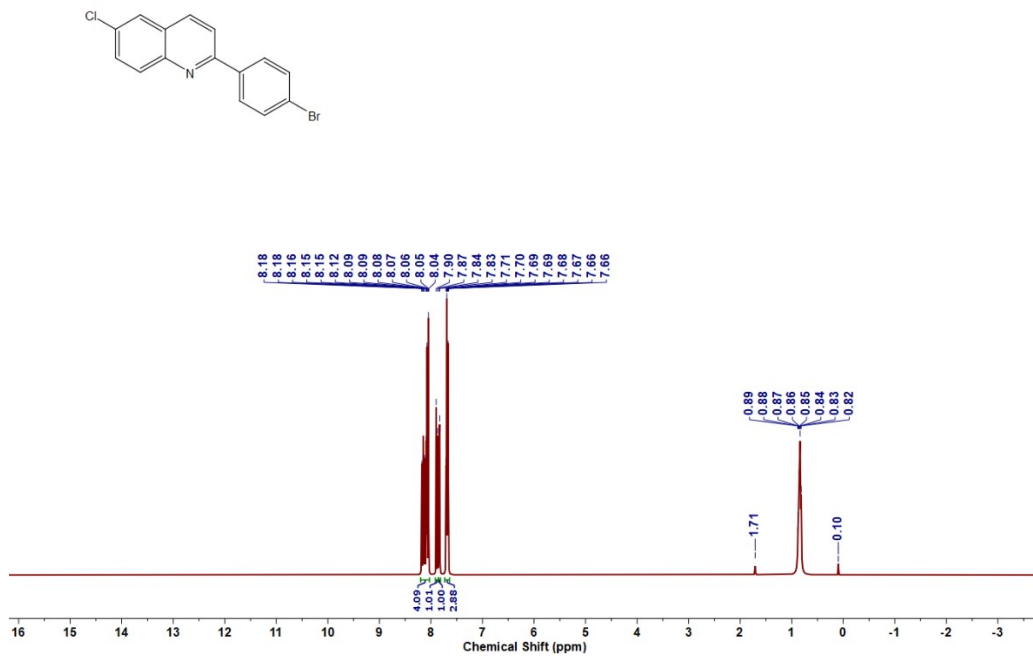

Figure S103: <sup>1</sup>H NMR spectrum of 10x

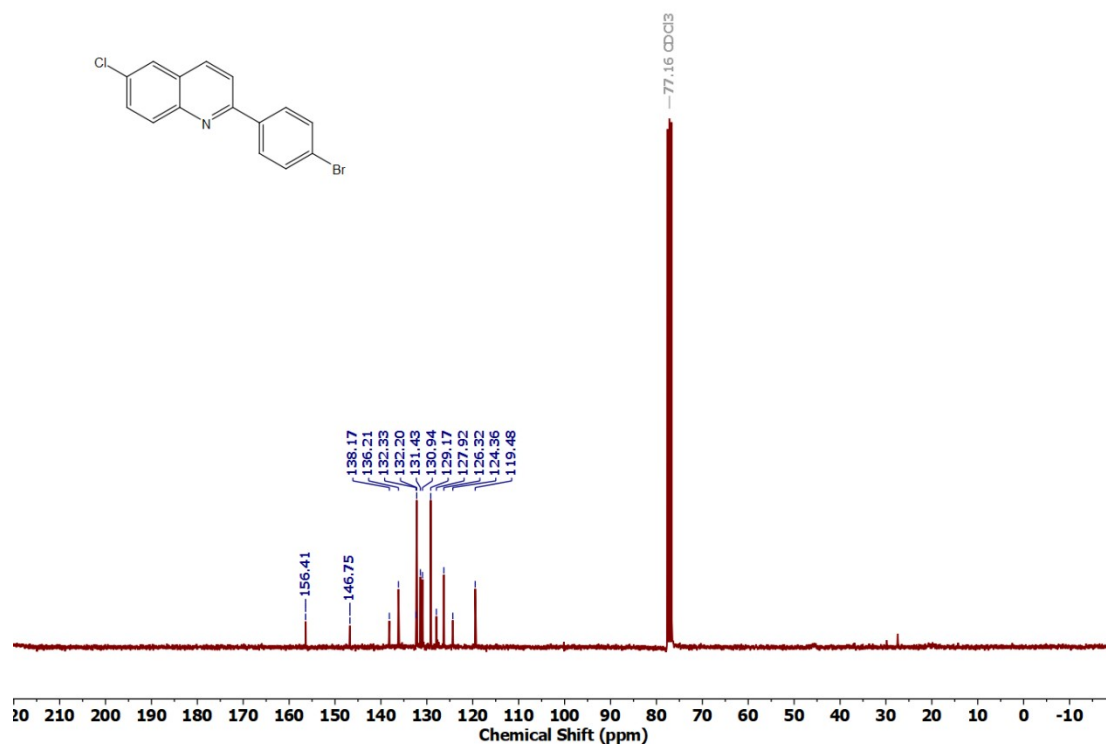

Figure S104: <sup>13</sup>C NMR spectrum of 10x

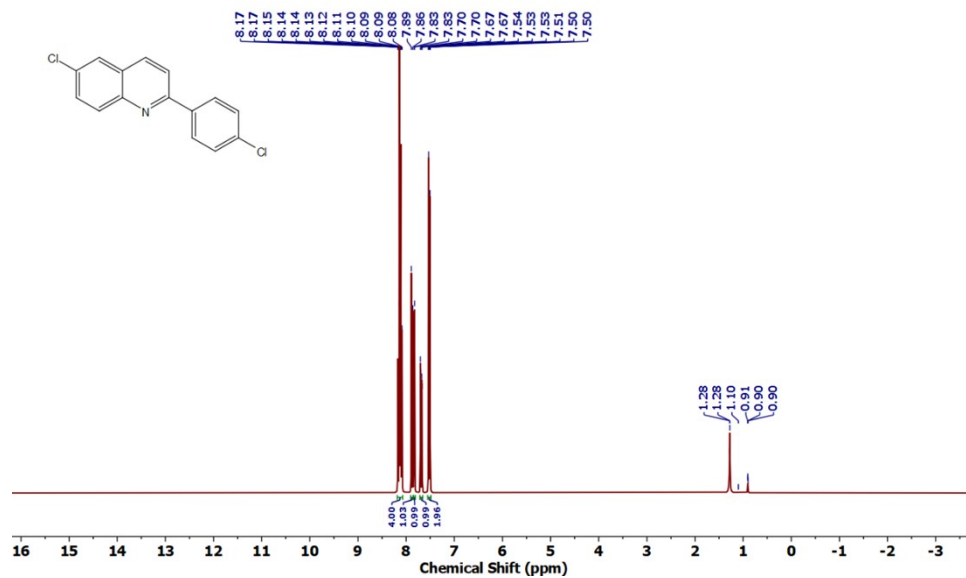

Figure S105: <sup>1</sup>H NMR spectrum of 10y

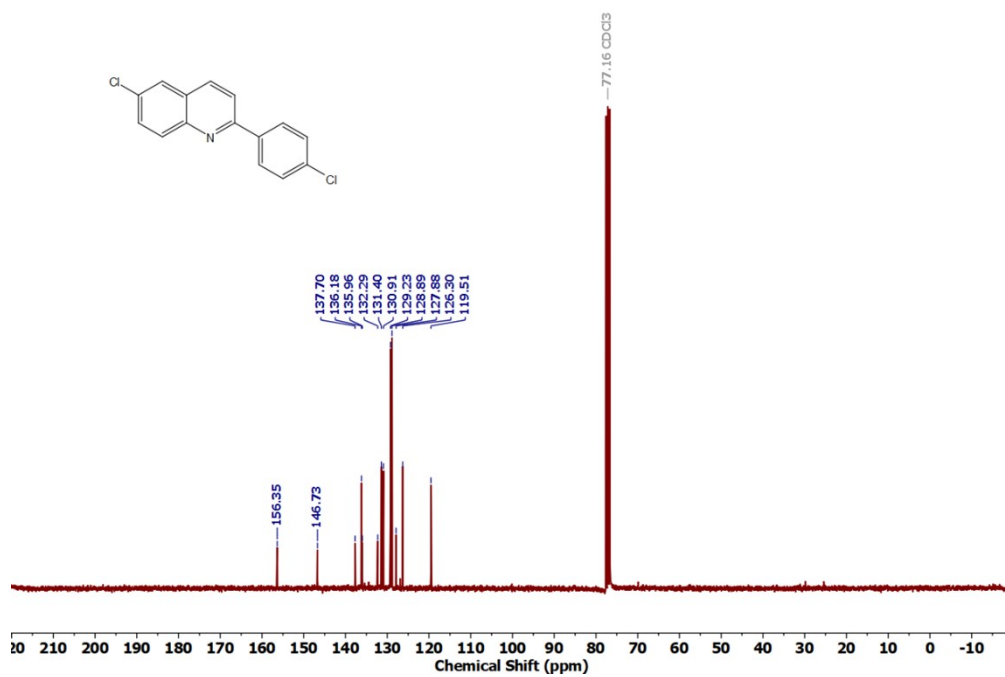

Figure S106: <sup>13</sup>C NMR spectrum of 10y

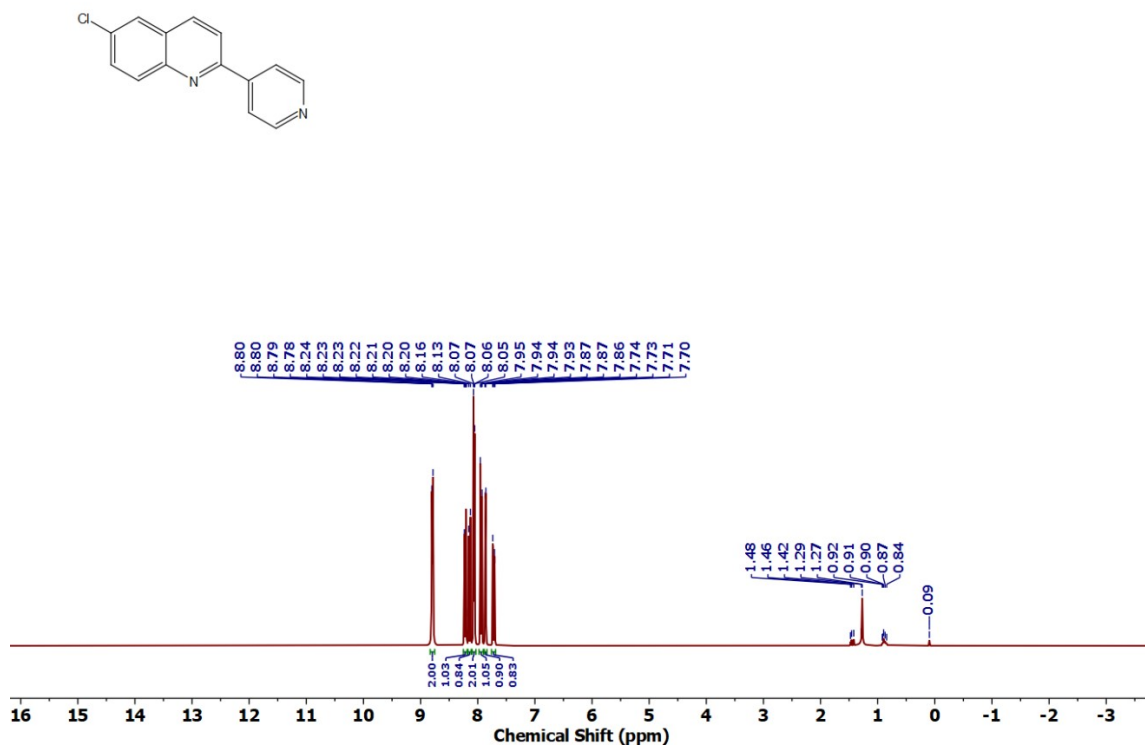

Figure S107: <sup>1</sup>H NMR spectrum of 10z

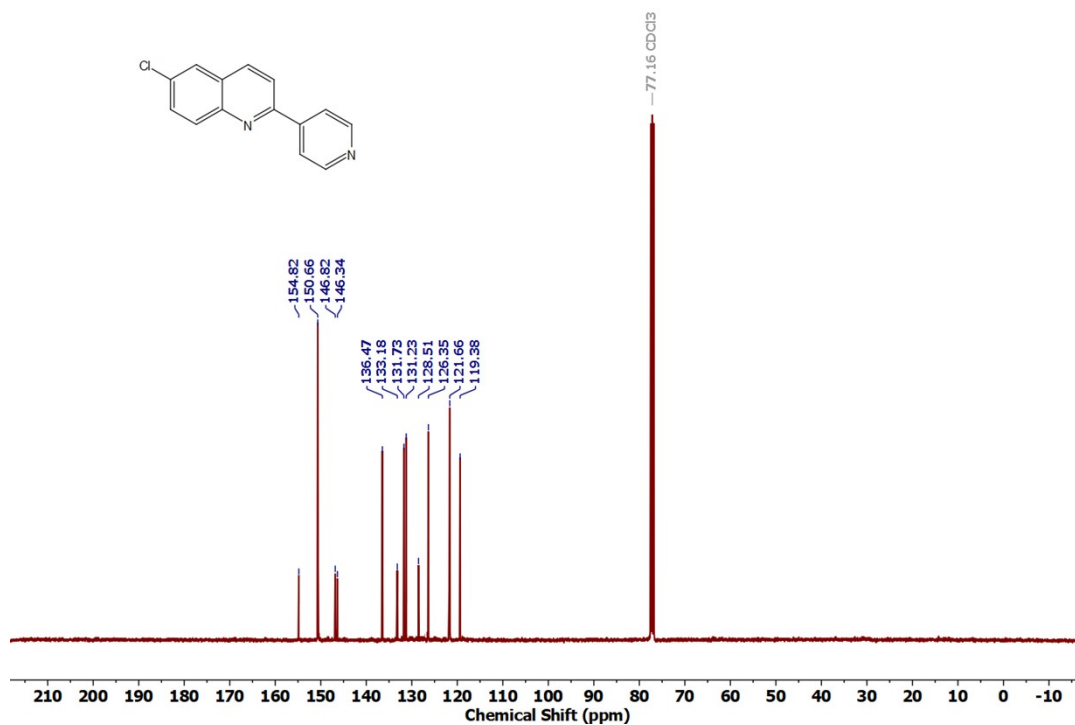

Figure S108: <sup>13</sup>C NMR spectrum of 10z

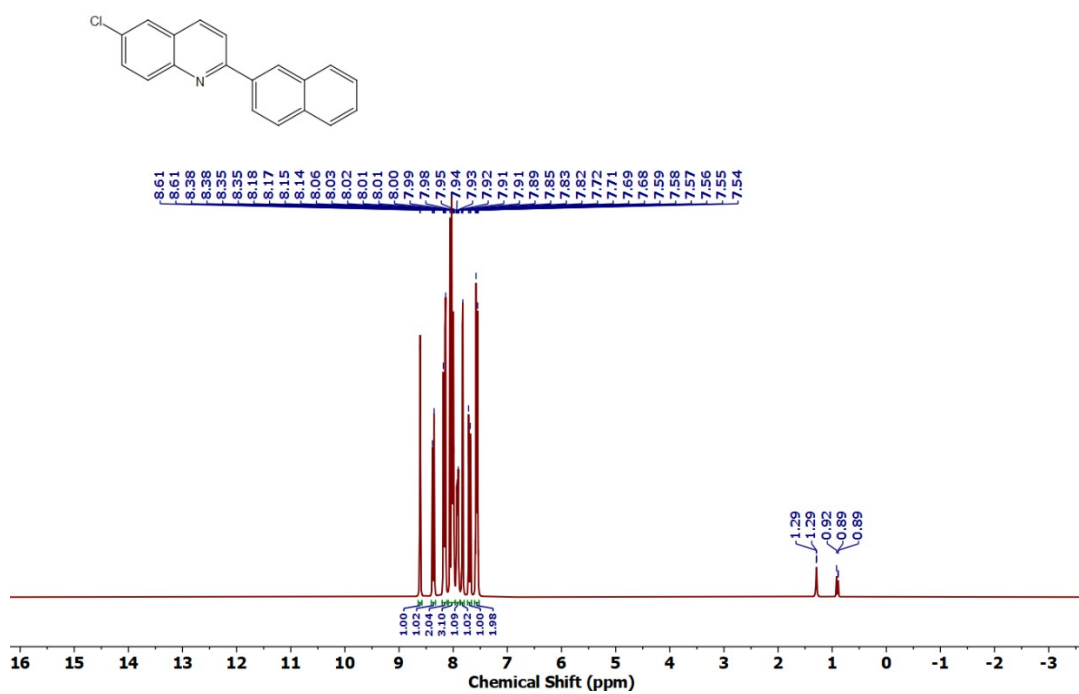

Figure S109: <sup>1</sup>H NMR spectrum of 10aa

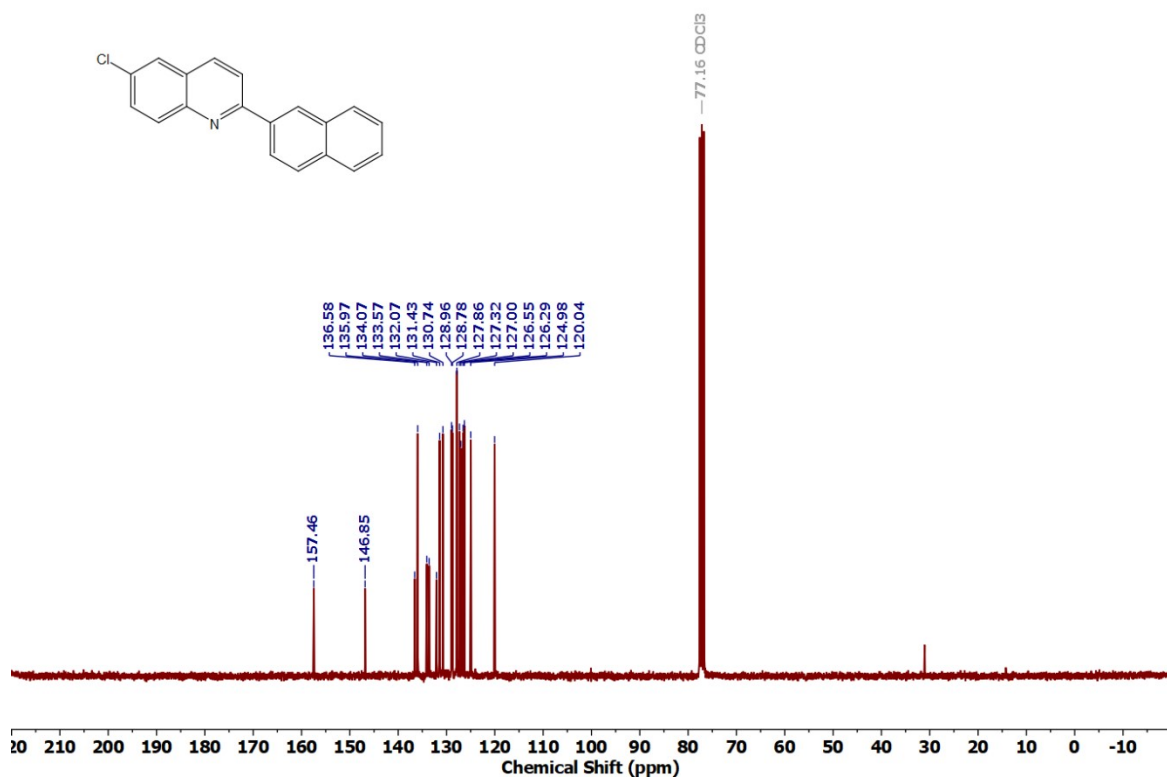

Figure S110: <sup>13</sup>C NMR spectrum of 10aa

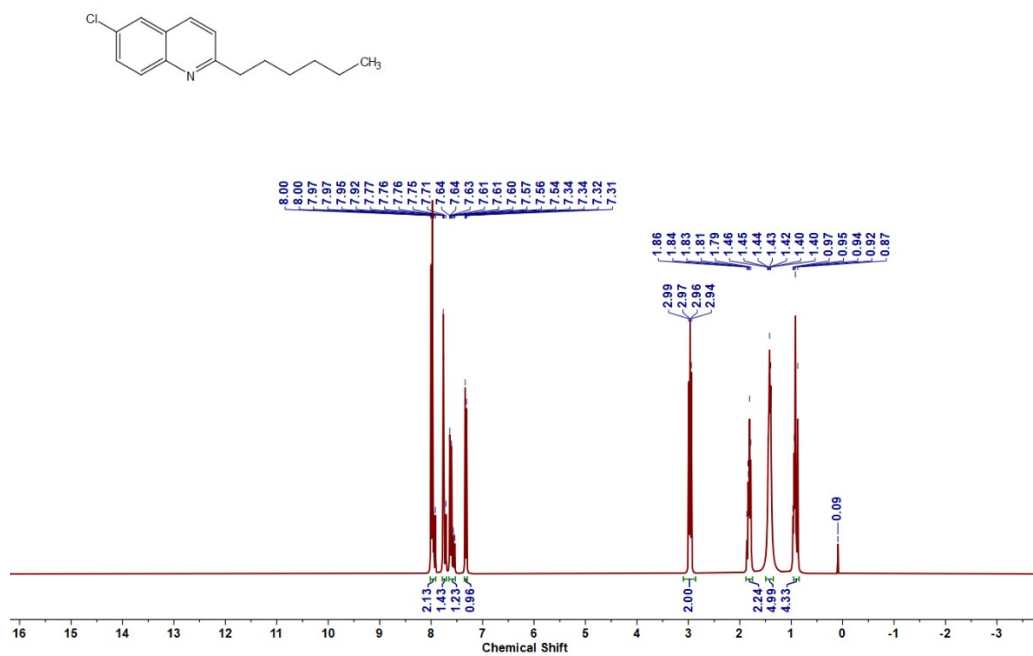

Figure S111: <sup>1</sup>H NMR spectrum of 10ab



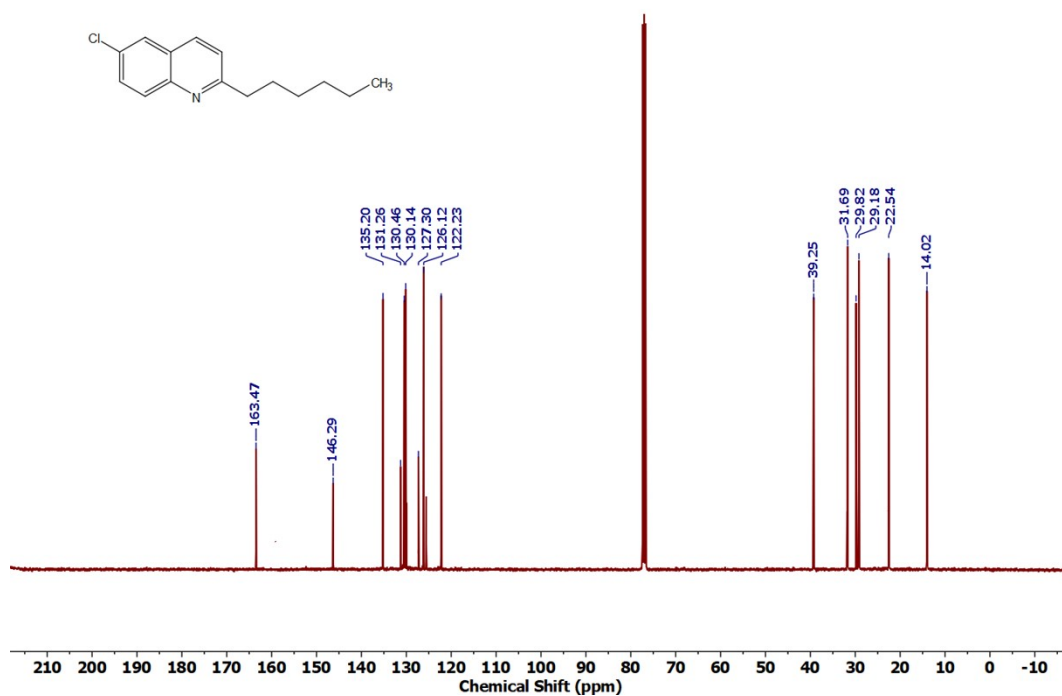

Figure S112:  $^{13}\text{C}$  NMR spectrum of **10ab**

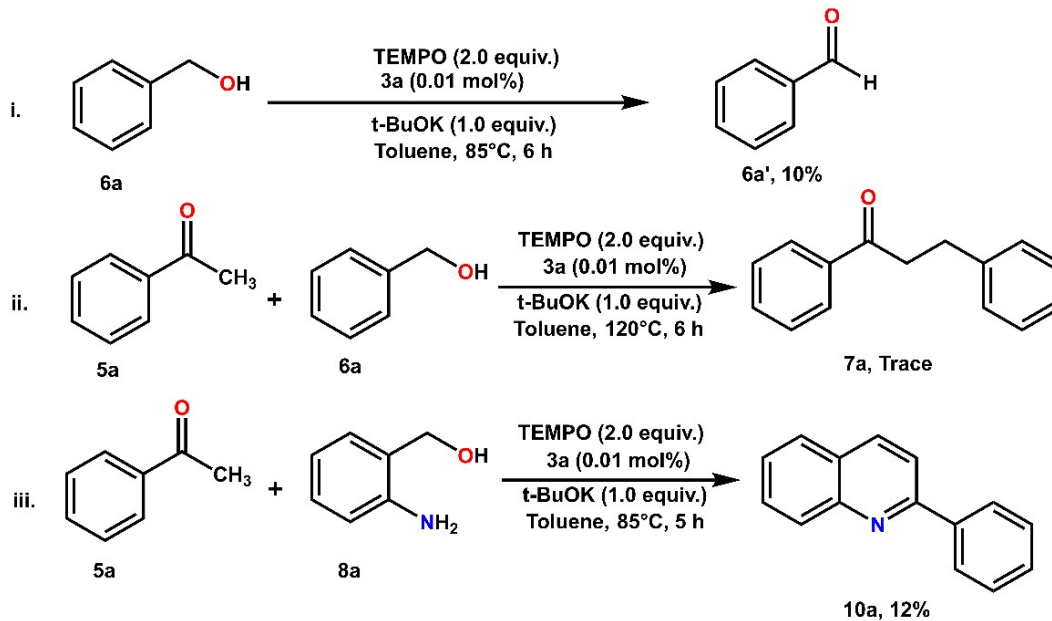

**Scheme S1:** Investigation of active participation of radical intermediate during catalytic transformation

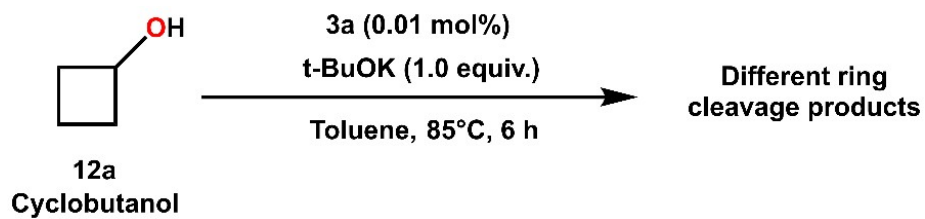

**Scheme S2:** Oxidation of radical clock substrate cyclobutanol under optimal condition

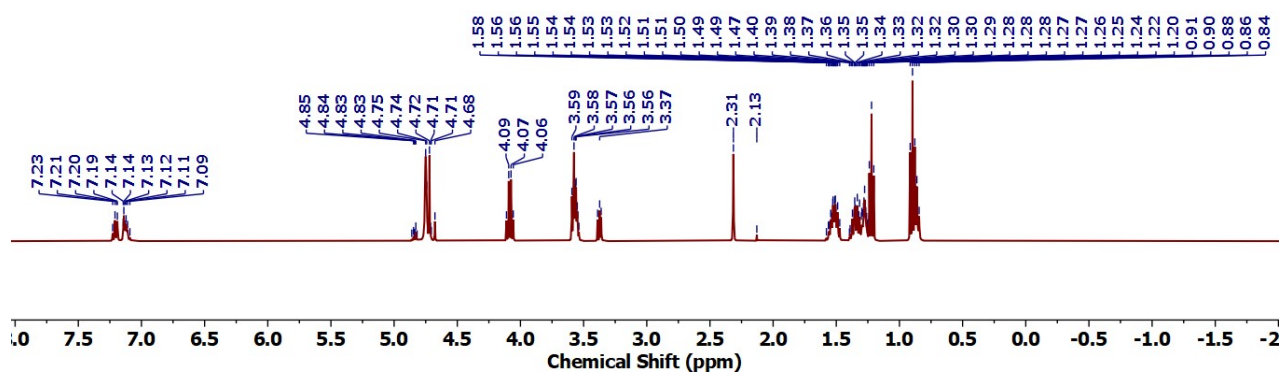

**Figure S113:**  $^1\text{H}$  NMR spectrum of reaction mixture of oxidation of cyclobutanol

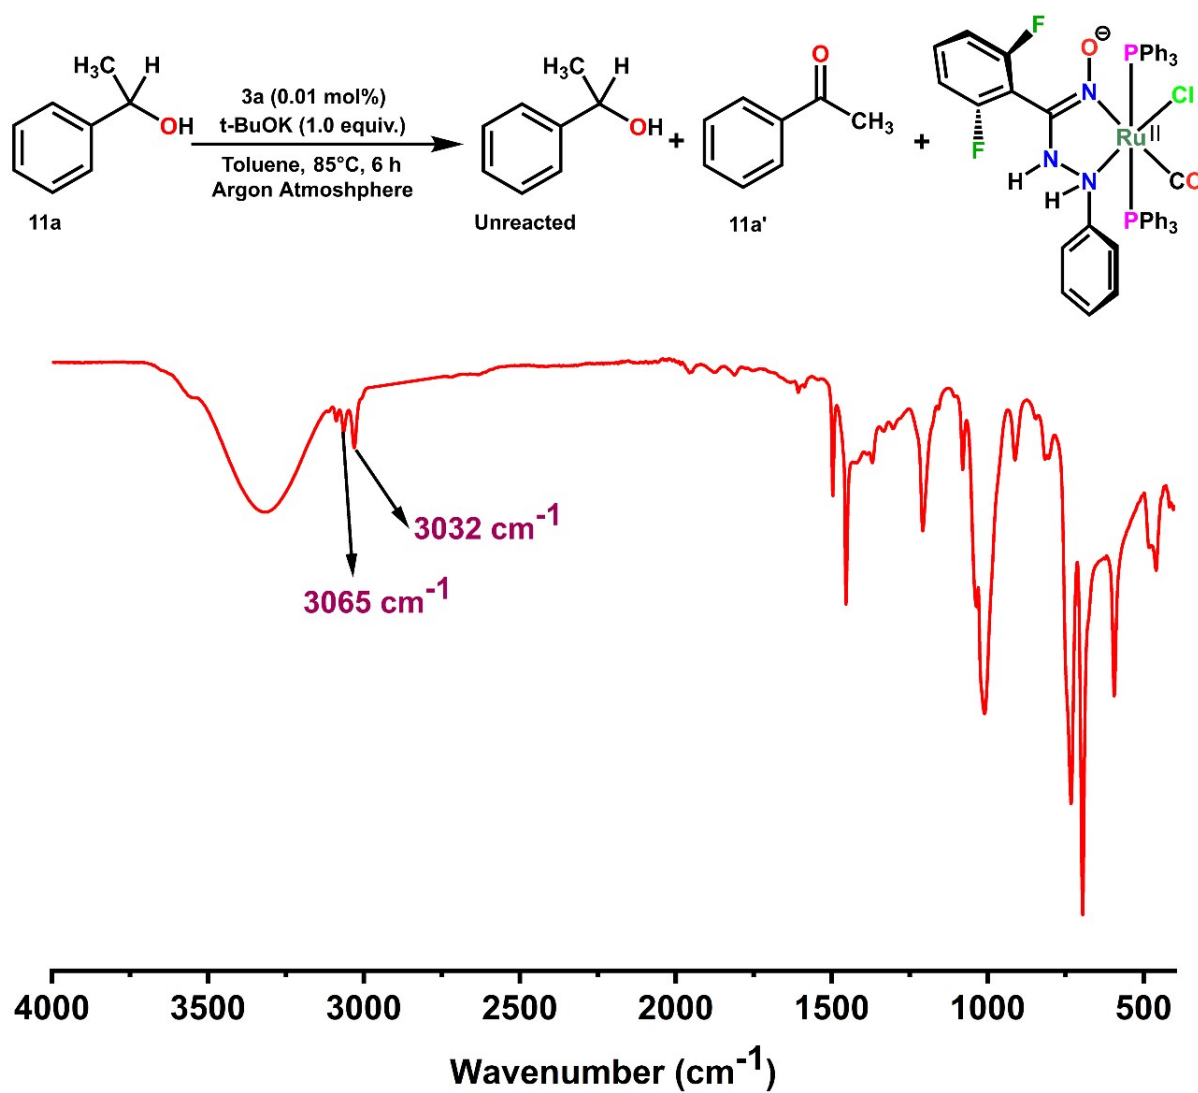

**Figure S114:** IR spectrum of the reaction mixture involving stoichiometric alcohol dehydrogenation of 1-phenylethanol (**11a**) under argon: involvement of azo/hydrizo redox couple with catalyst **3a**.

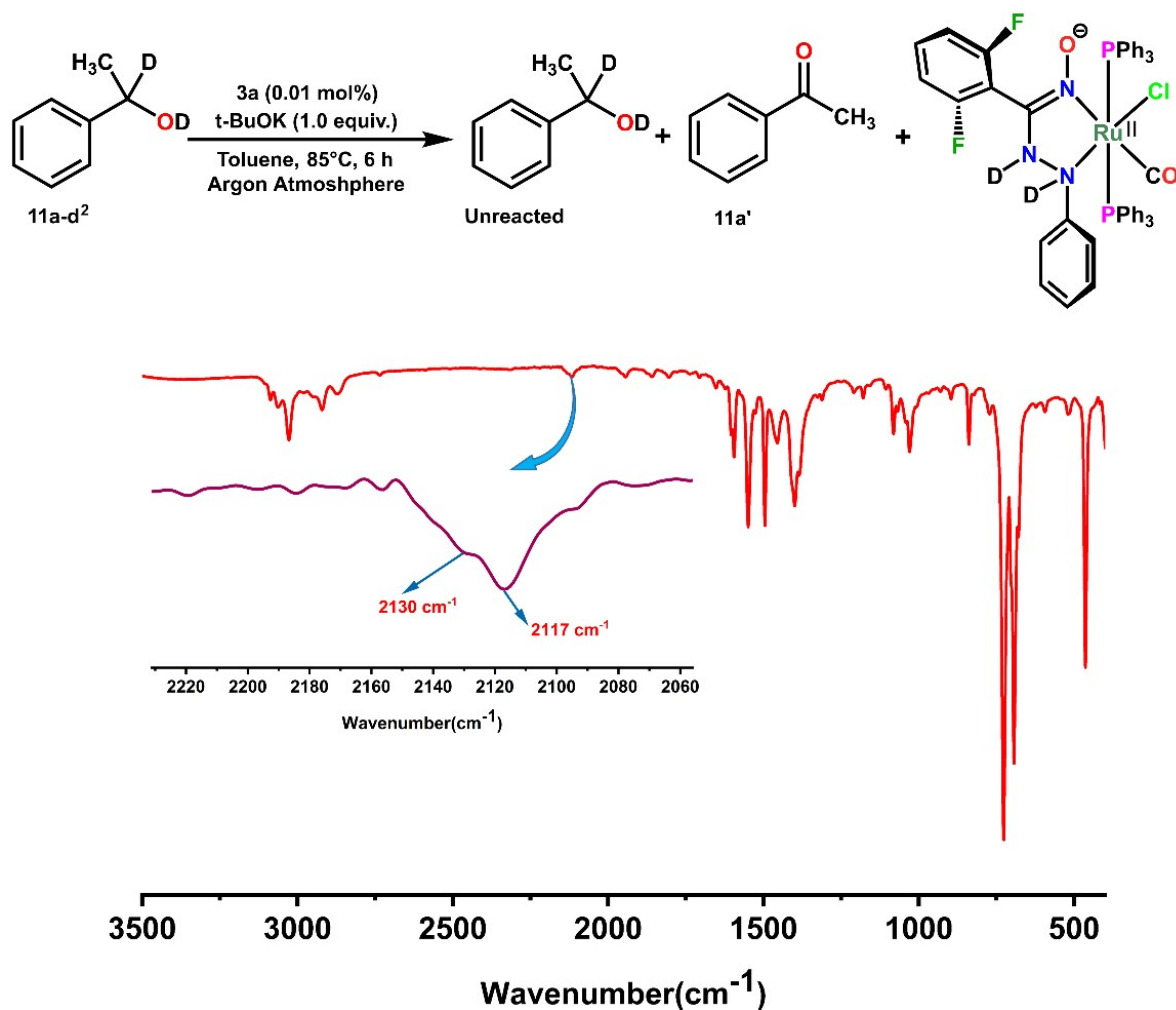

**Figure S115:** IR spectrum of the reaction mixture involving stoichiometric alcohol dehydrogenation of deuterated 1-phenylethanol (**11a-d<sup>2</sup>**) under argon: involvement of azo/hydrazo redox couple with catalyst **3a**.

#### Appendix: Supplementary data

X-ray crystallographic data of **1a**, **2a**, **3a**, **4a**, **10i** and **10t** have been deposited with the Cambridge Crystallographic Data Centre, (12 Union Road, Cambridge CB2 1EZ, UK, United Kingdom; fax: (+44) 1223-336-033; or email: [deposit@ccdc.cam.ac.uk](mailto:deposit@ccdc.cam.ac.uk)) under deposition number CCDC

2303590, 2303589, 2303602, 2303603, 2303607, 2303608 and can be access free of charge the Centre or via its website ( <http://www.ccdc.cam.ac.uk>).

### References:

1. SAINT, Data Reduction and Frame Integration Program for the CCD Area-Detector System. Bruker Analytical X-ray Systems, Madison, Wisconsin, USA, 1997–2006.
2. G.M. Sheldrick, SADABS, Program for Area Detector Absorption Correction, Institute for Inorganic Chemistry, University of Göttingen, Germany (1996).
3. G.M. Sheldrick, *Acta Crystallogr. Sect. C: Struct. Chem.*, 2015, **71**, 3-8.
4. O.V. Dolomanov, L.J. Bourhis, R.J. Gildea, J.A.K. Howard, H. Puschmann, *J. Appl. Cryst.*, 2009, **42**, 339-341.
5. A.D. Becke, *J. Chem. Phys.*, 1993, **98**, 5648-5652.
6. C. Lee, W. Yang, R.G. Parr, *Phys. Rev. B: Condens. Matter*, 1988, **37**, 785-789.
7. M. J. Frisch, G. W. Trucks, H. B. Schlegel, G. E. Scuseria, M. A. Robb, J. R. Cheeseman, G. Scalmani, V. Barone, B. Mennucci, G. A. Petersson, H. Nakatsuji, M. Caricato, X. Li, H. P. Hratchian, A. F. Izmaylov, J. Bloino, G. Zheng, J. L. Sonnenberg, M. Hada, M. Ehara, K. Toyota, R. Fukuda, J. Hasegawa, M. Ishida, T. Nakajima, Y. Honda, O. Kitao, H. Nakai, T. Vreven, J. A. Montgomery Jr., J. E. Peralta, F. Ogliaro, M. Bearpark, J. J. Heyd, E. Brothers, K. N. Kudin, V. N. Staroverov, R. Kobayashi, J. Normand, K. Raghavachari, A. Rendell, J. C. Burant, S. S. Iyengar, J. Tomasi, M. Cossi, N. Rega, J. M. Millam, M. Klene, J. E. Knox, J. B. Cross, V. Bakken, C. Adamo, J. Jaramillo, R. Gomperts, R. E. Stratmann, O. Yazyev, A. J. Austin, R. Cammi, C. Pomelli, J. W. Ochterski, R. L. Martin, K. Morokuma, V. G. Zakrzewski, G. A. Voth, P. Salvador, J. J. Dannenberg, S. Dapprich, A. D. Daniels, O. Farkas, J. B. Foresman, J. V. Ortiz, J.

- Cioslowski, D. J. Fox, GAUSSIAN 09 (Revision A.01), Gaussian, Inc., Wallingford, CT, (2009).
8. J. Autschbach, T. Ziegler, S.J.A. Gisbergen, E.J. Baerends, *J. Chem. Phys.*, 2002, **116**, 6930-6940.
  9. K.L. Bak, P. Jørgensen, T. Helgaker, K. Rund, H.J.A. Jensen, *J. Chem. Phys.*, 1993, **98**, 8873-8887.
  10. T. Helgaker, P. Jørgensen, *J. Chem. Phys.*, 1991, **95**, 2595-2601.
  11. E.K.U. Gross, W. Kohn, *Adv. Quantum Chem.*, 1990, **21**, 255-291.
  12. M. Cossi, N. Rega, G. Scalmani, V. Barone, *J. Comput. Chem.*, 2003, **24**, 669-681.
  13. M. Cossi, V. Barone, *J. Chem. Phys.*, 2001, **115**, 4708-4717.
  14. V. Barone, M. Cossi, *J. Phys. Chem. A*, 1998, **102**, 1995-2001.
  15. T. Liu, H.X. Zhang, B.H. Xia, *J. Phys. Chem. A*, 2007, **111**, 8724-8730.
  16. A. Albertino, C. Garino, S. Ghiani, *J. Organomet. Chem.*, 2007, **692**, 1377-1391.
  17. X. Zhou, H.X. Zhang, Q.J. Pan, B.H. Xia, *J. Phys. Chem. A*, 2005, **109**, 8809-8818.
  18. X. Zhou, A.M. Ren, J.K. Feng, *J. Organomet. Chem.*, 2005, **690**, 338-347.
  19. P.J. Hay, W.R. Wadt, *J. Chem. Phys.*, 1985, **82**, 299-310.
  20. P.J. Hay, W.R. Wadt, Ab Initio effective core potentials for molecular calculations. Potentials for the transition metal atoms Sc to Hg, *J. Chem. Phys.* 82 (1985) 270–283.
  21. M.S. Gordon, J.S. Binkley, J.A. Pople, W.J. Pietro, W.J. Hehre, *J. Am. Chem. Soc.*, 1982, **104**, 2797-2803.
  22. J.S. Binkley, J.A. Pople, W.J. Hehre, *J. Am. Chem. Soc.*, 1980, **102**, 939-947.
  23. N.M. O'Boyle, A.L. Tenderholt, K.M. Langner, *J. Comput. Chem.*, 2008, **29**, 839-845.
